# Supplementary material for: Small but Powerful, the Primary Endosymbiont of Moss Bugs, Candidatus Evansia muelleri, Holds a Reduced Genome with Large Biosynthetic Capabilities
Source: PubMed Central journal article supplement (PMC4122945; doi:10.1093/gbe/evu149), 2014-07-10

# Figure S1

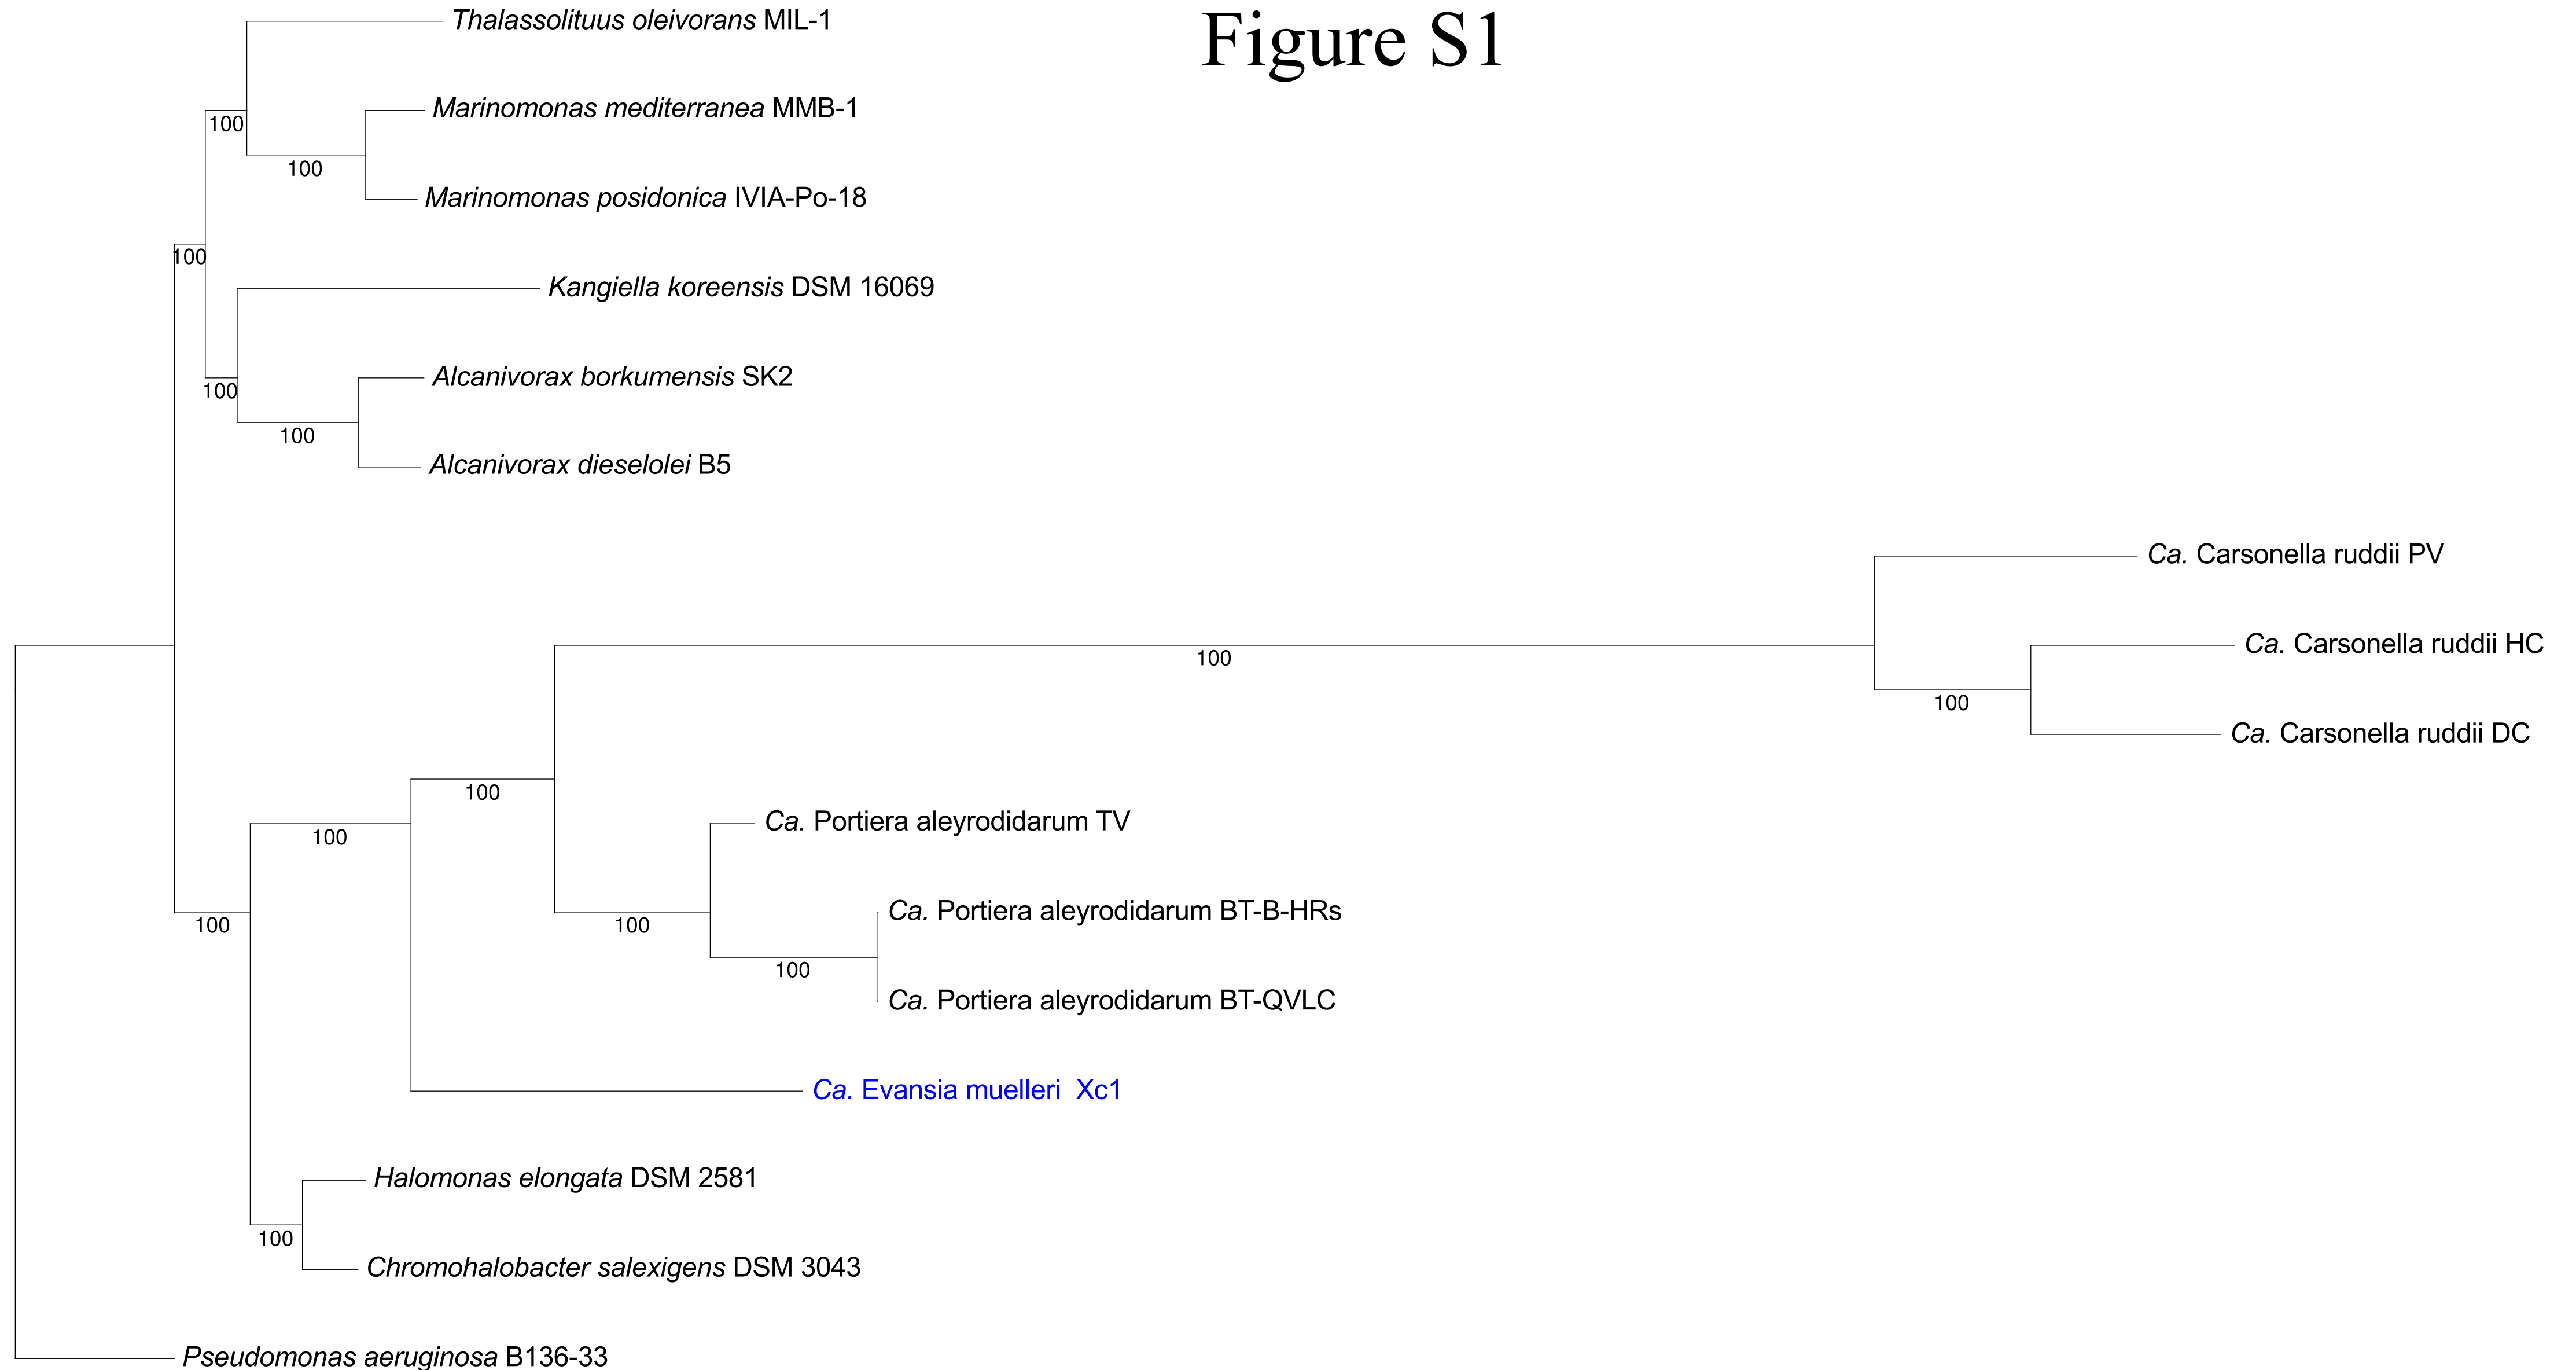

# Energy production and conversion

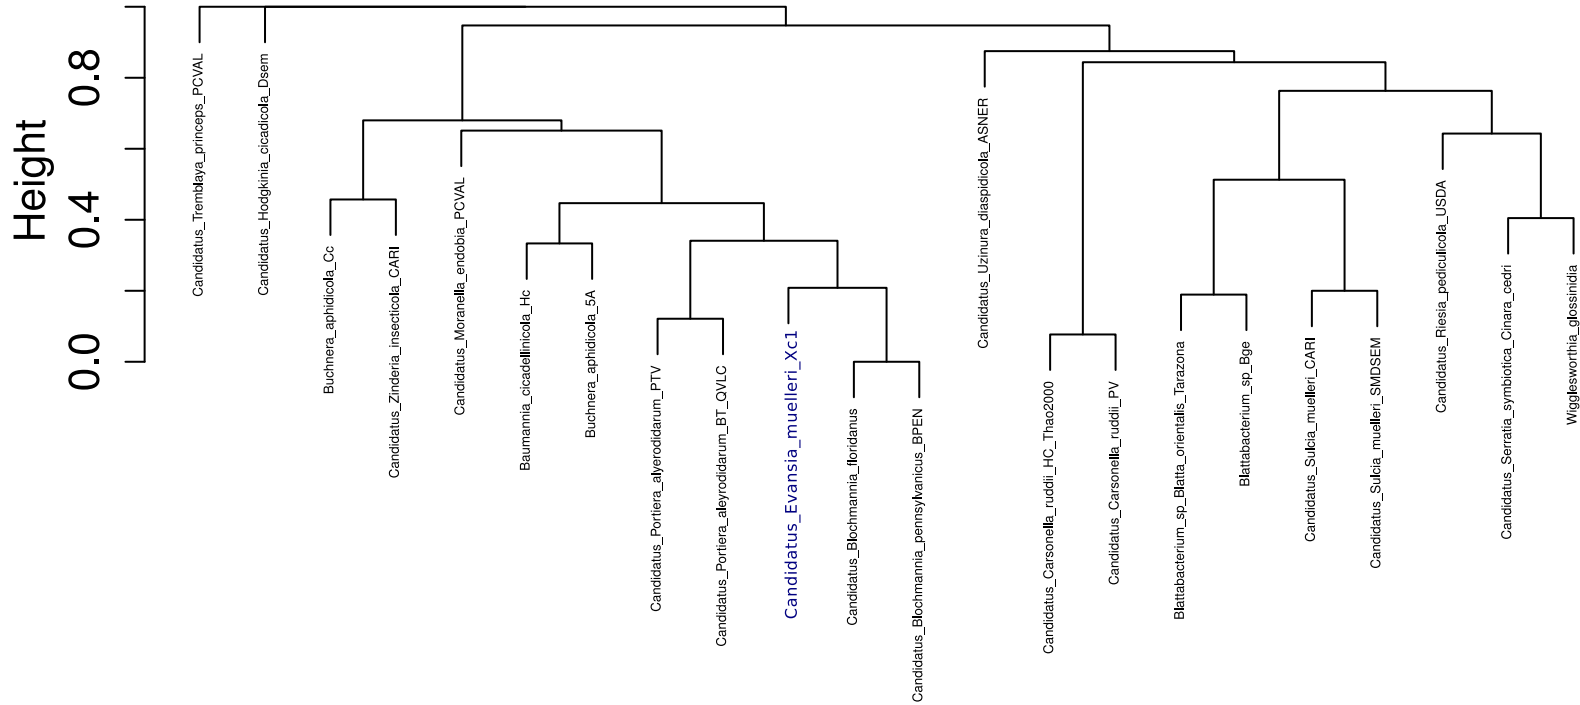

Figure S3

## Amino acid transport and metabolism

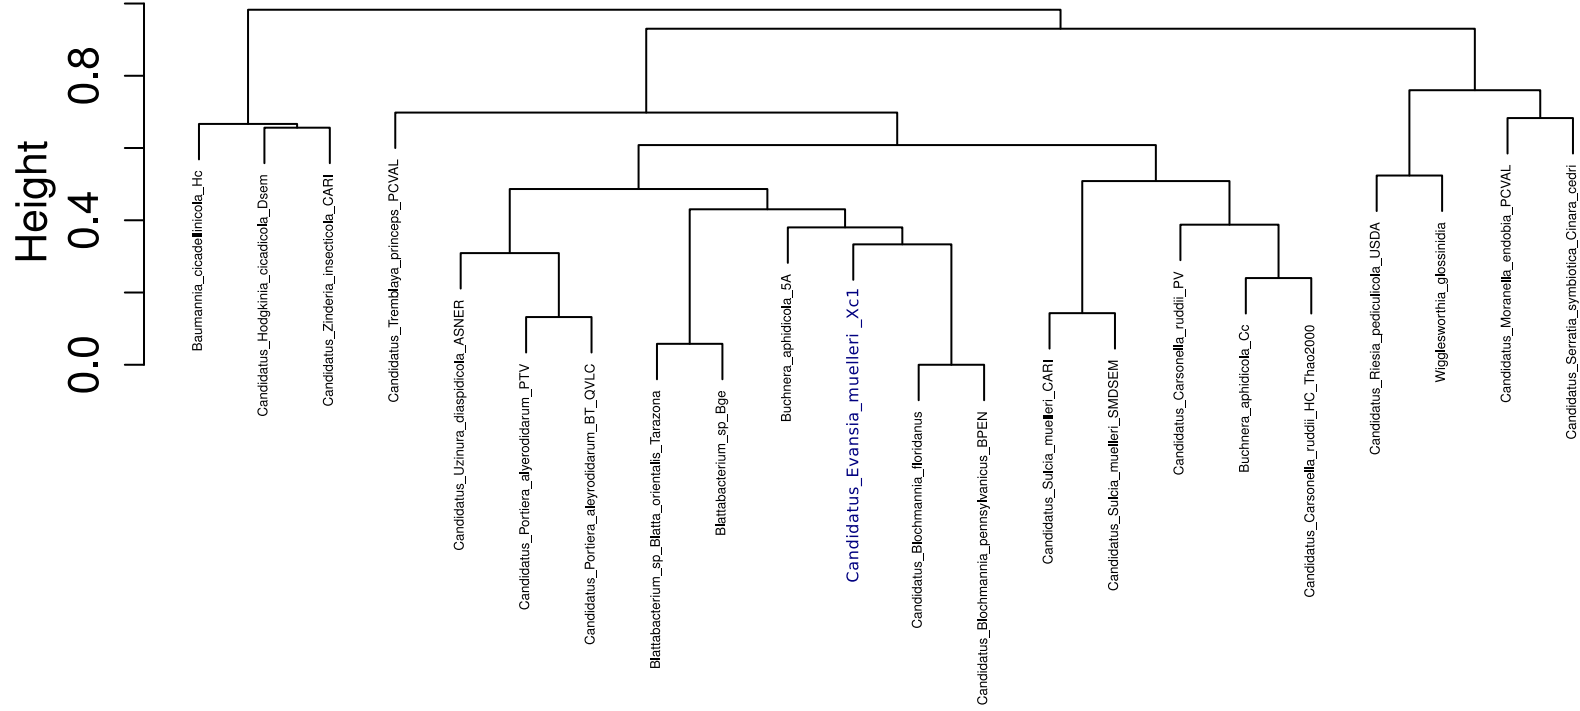

# Coenzyme transport and metabolism

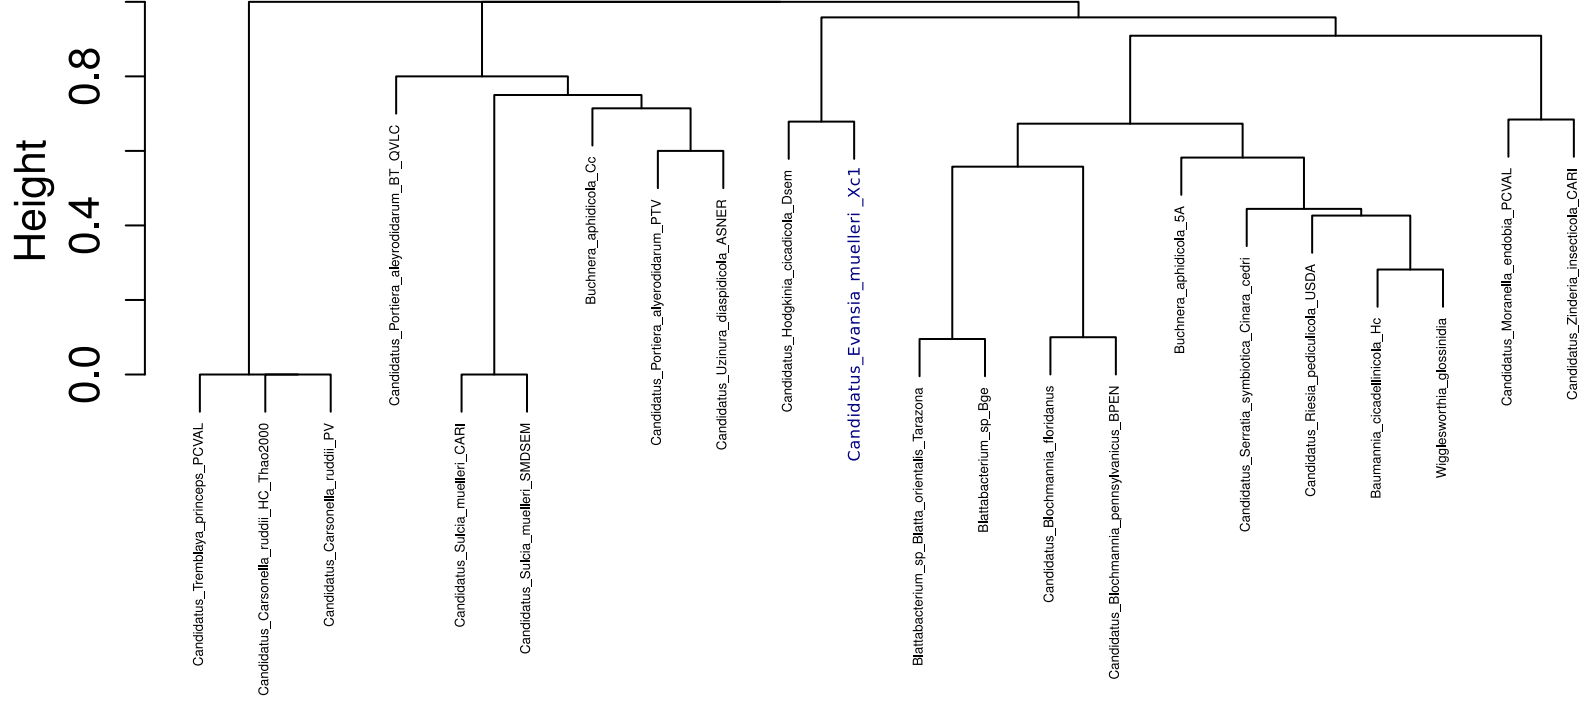

Figure S5

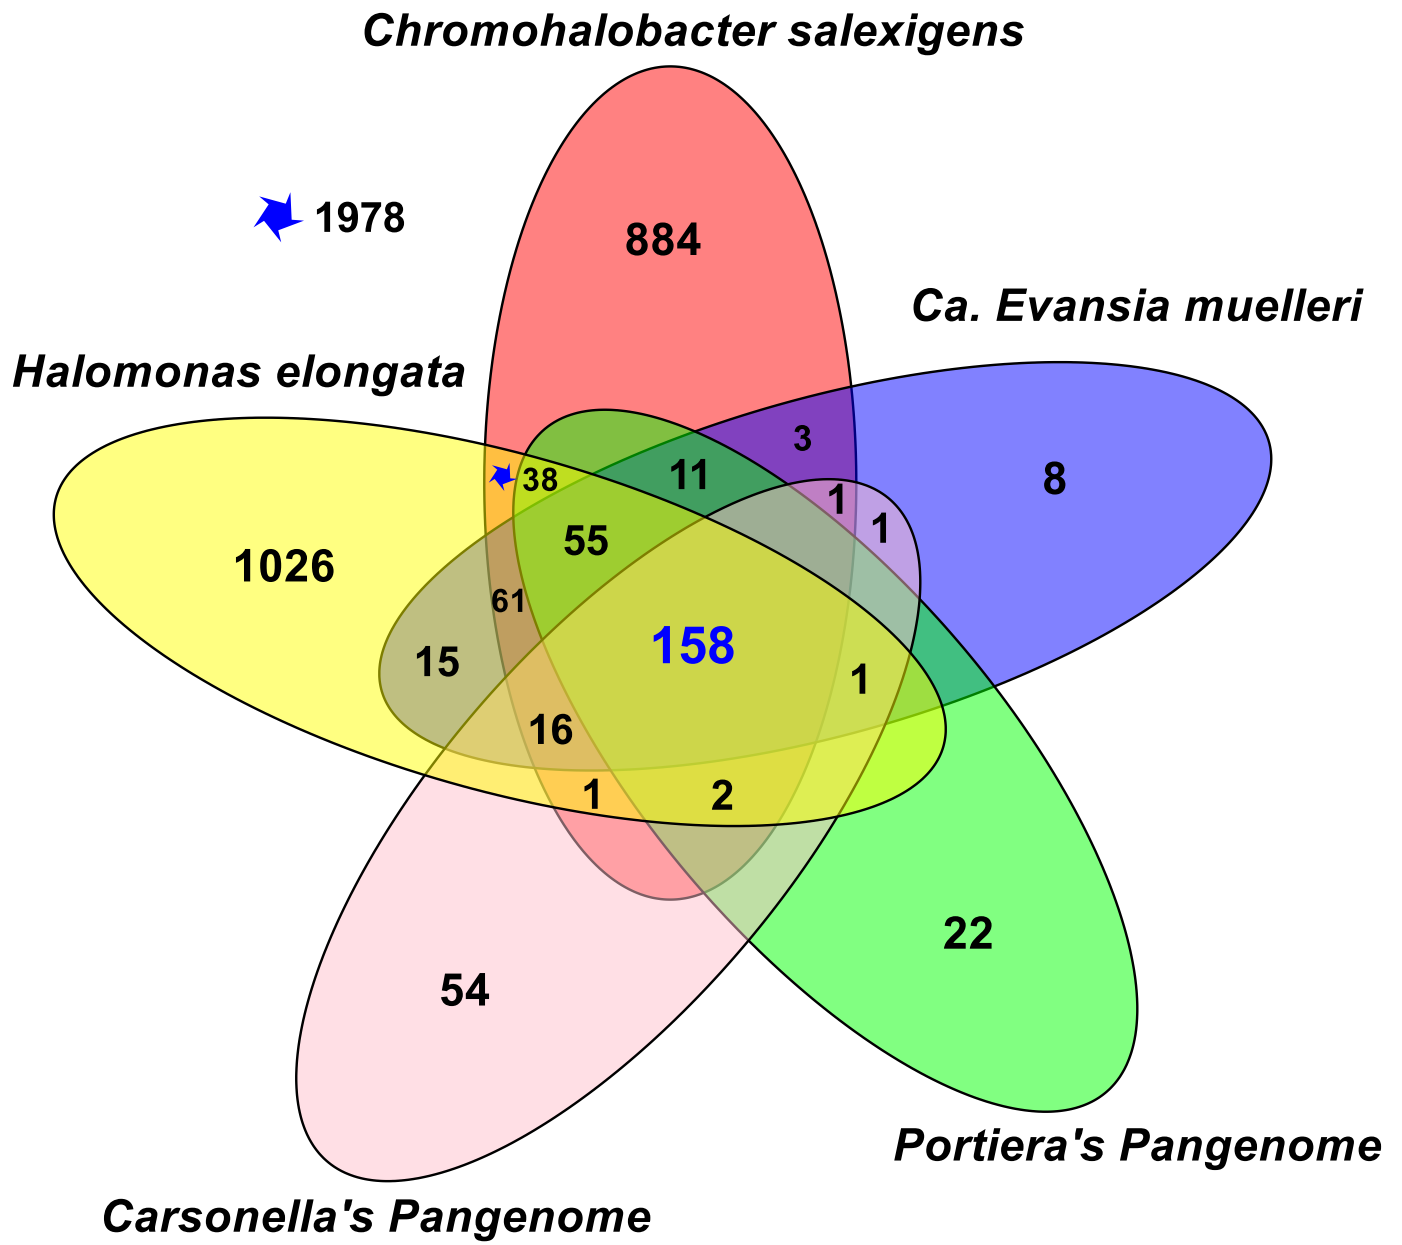

Supplement: supp_evu149_Supplementary_file_1.pdf [file supp_evu149_Supplementary_file_1.pdf]
