# Supplementary material for: Small but Powerful, the Primary Endosymbiont of Moss Bugs, Candidatus Evansia muelleri, Holds a Reduced Genome with Large Biosynthetic Capabilities
Source: PubMed Central journal article supplement (PMC4122945; doi:10.1093/gbe/evu149), 2014-07-10
Supplement: supp_evu149_Supplementary_file_2.pdf [file supp_evu149_Supplementary_file_2.pdf]

# ArgG

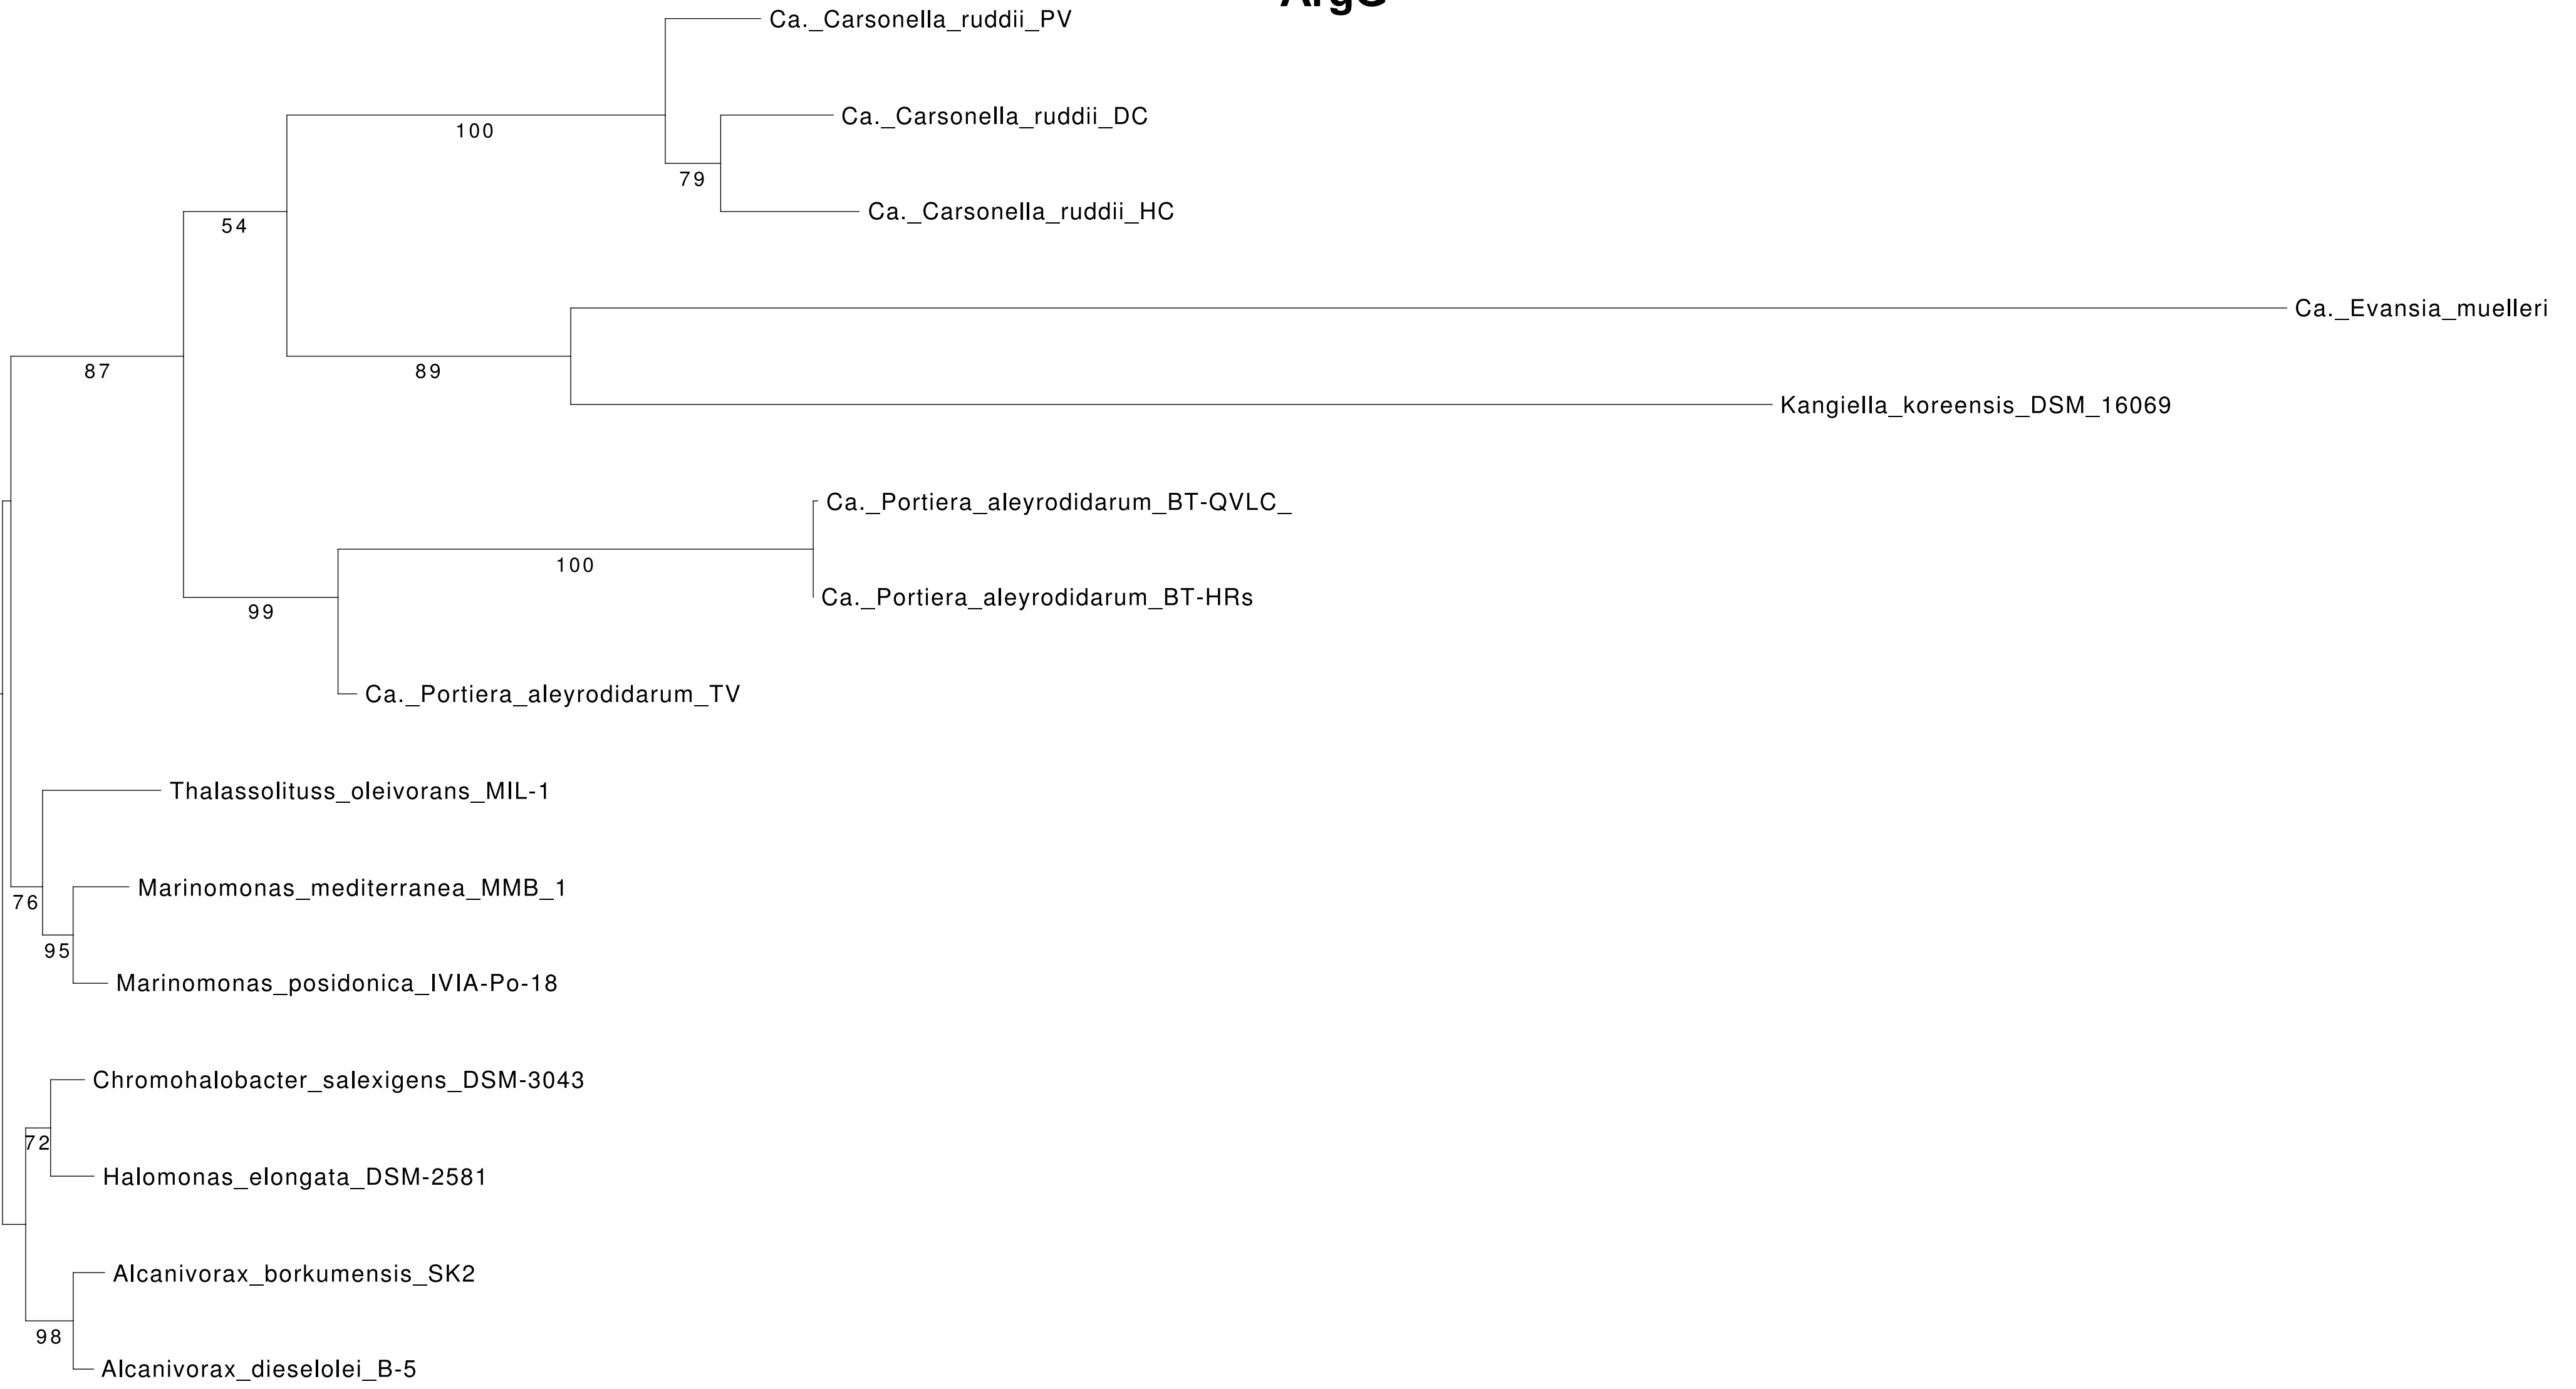

0.1

# AroC

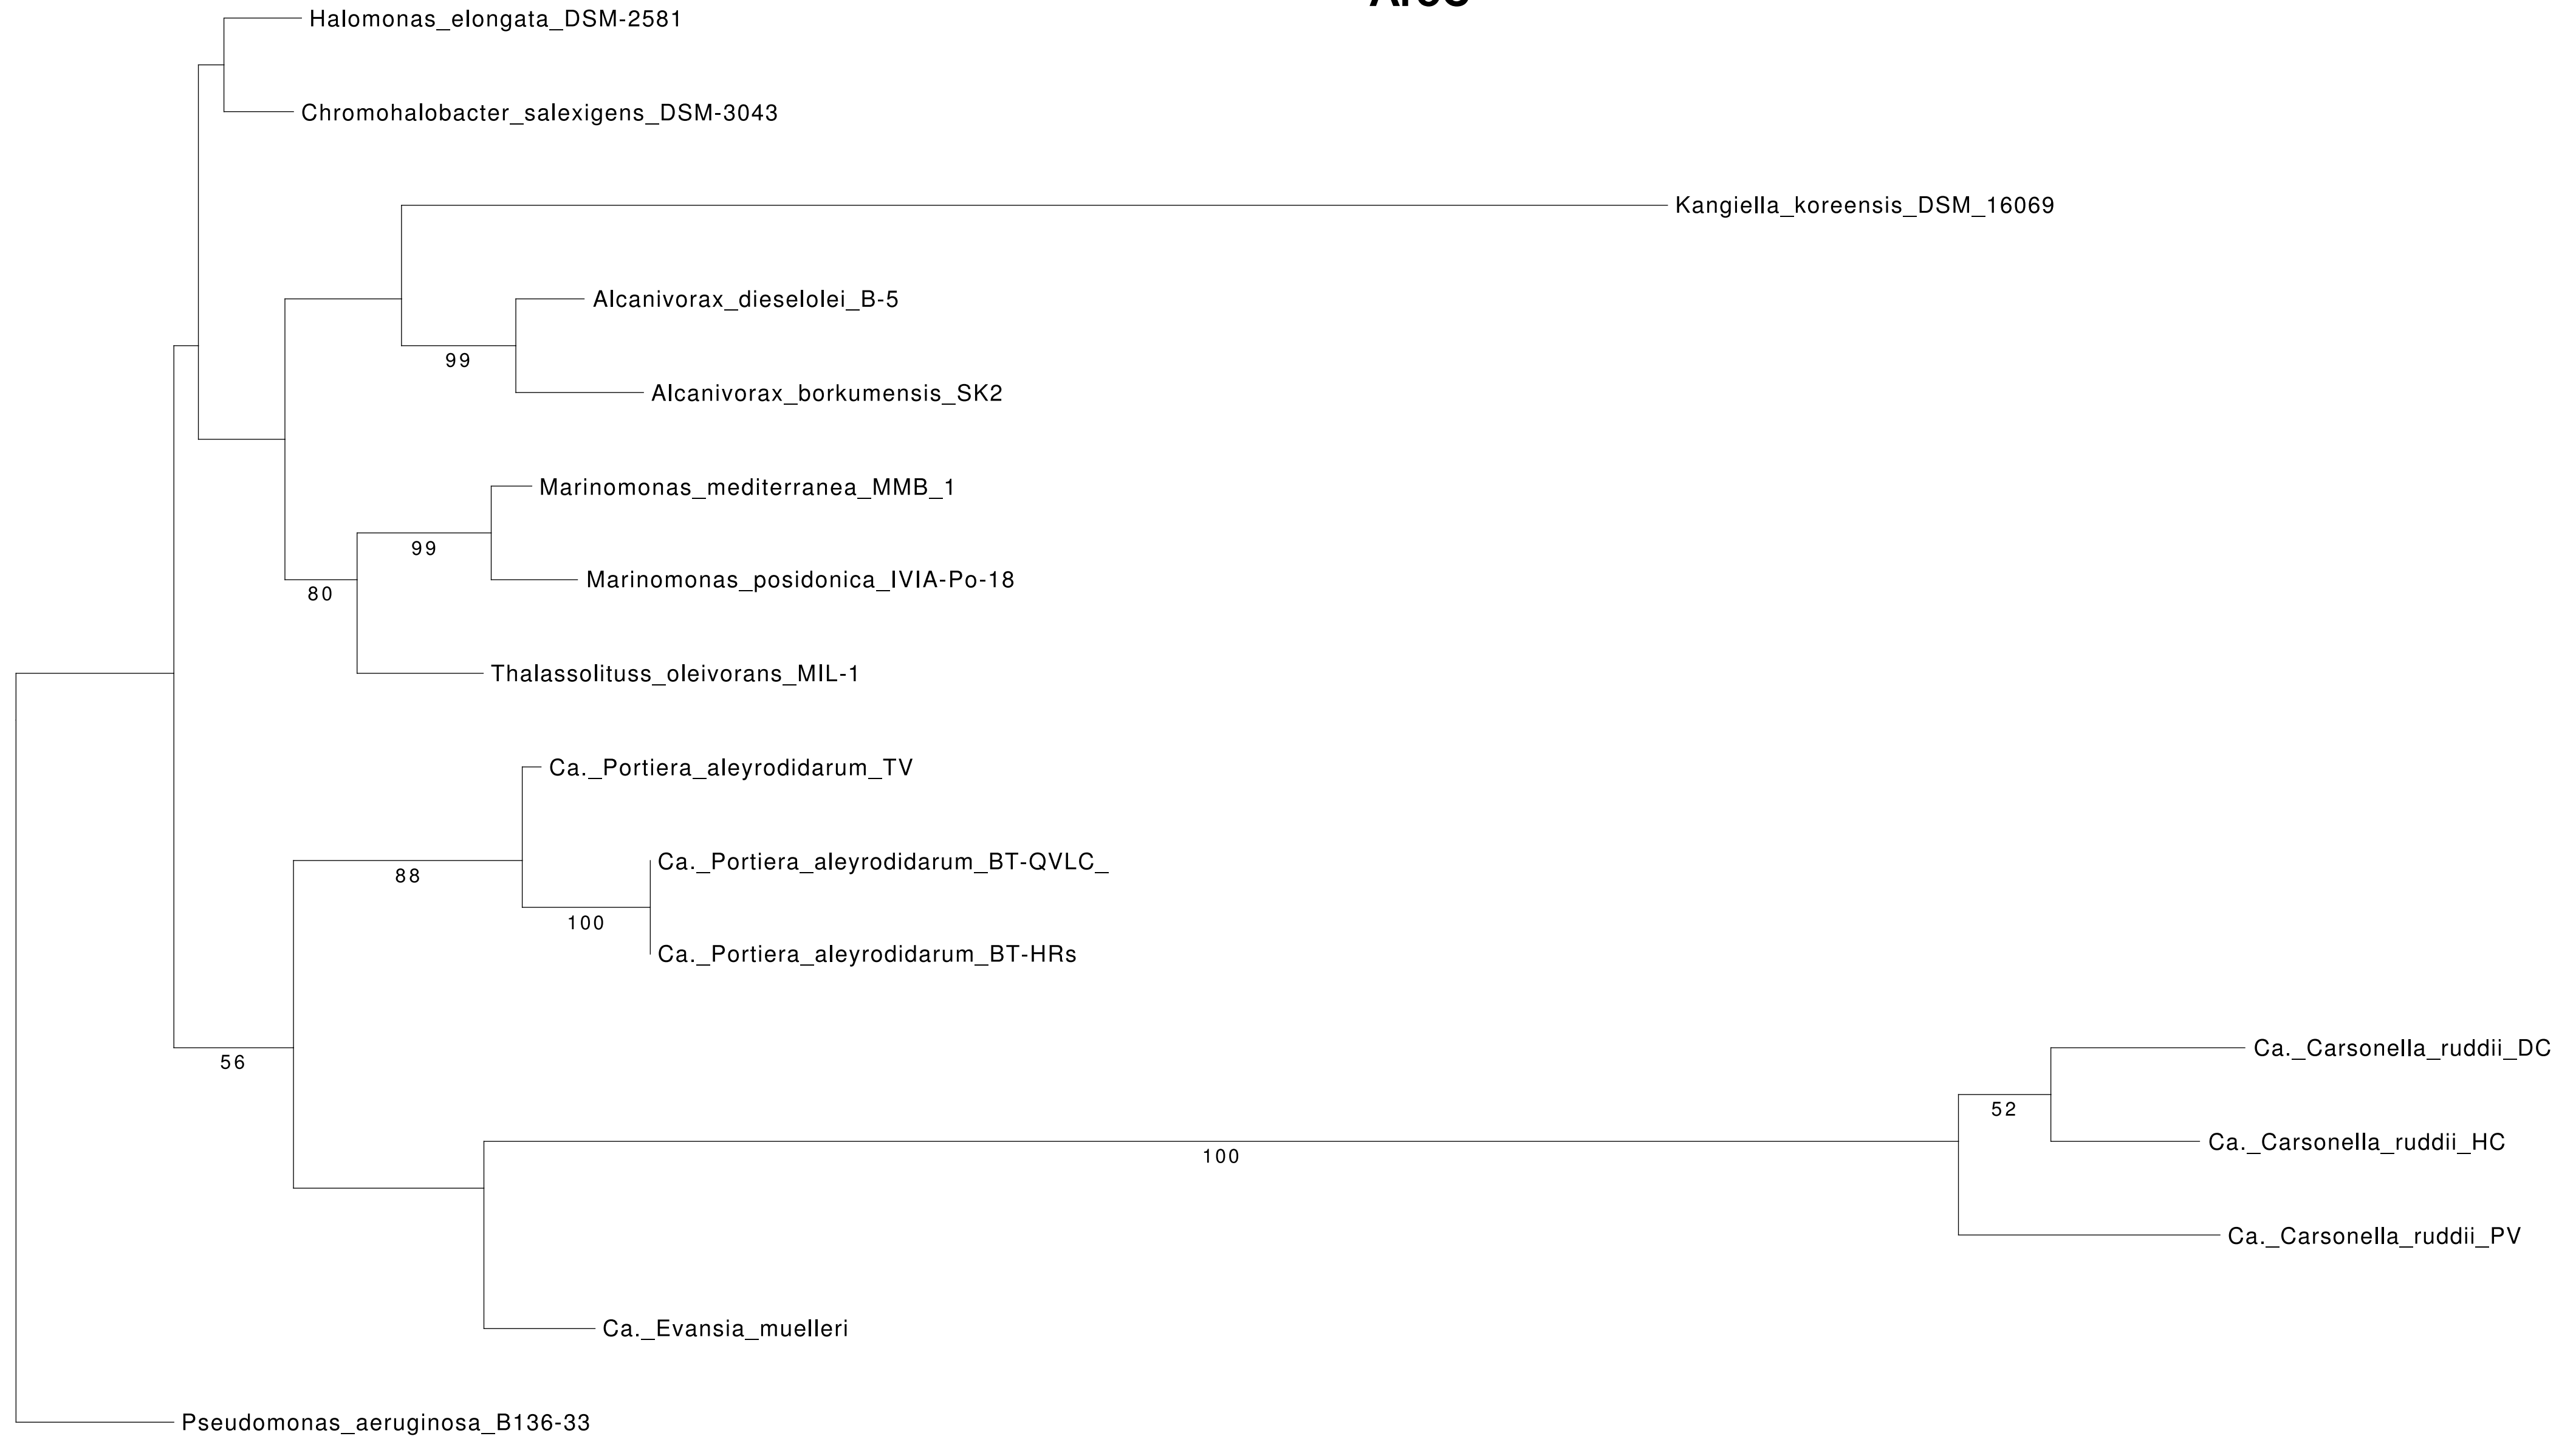

# AtpA

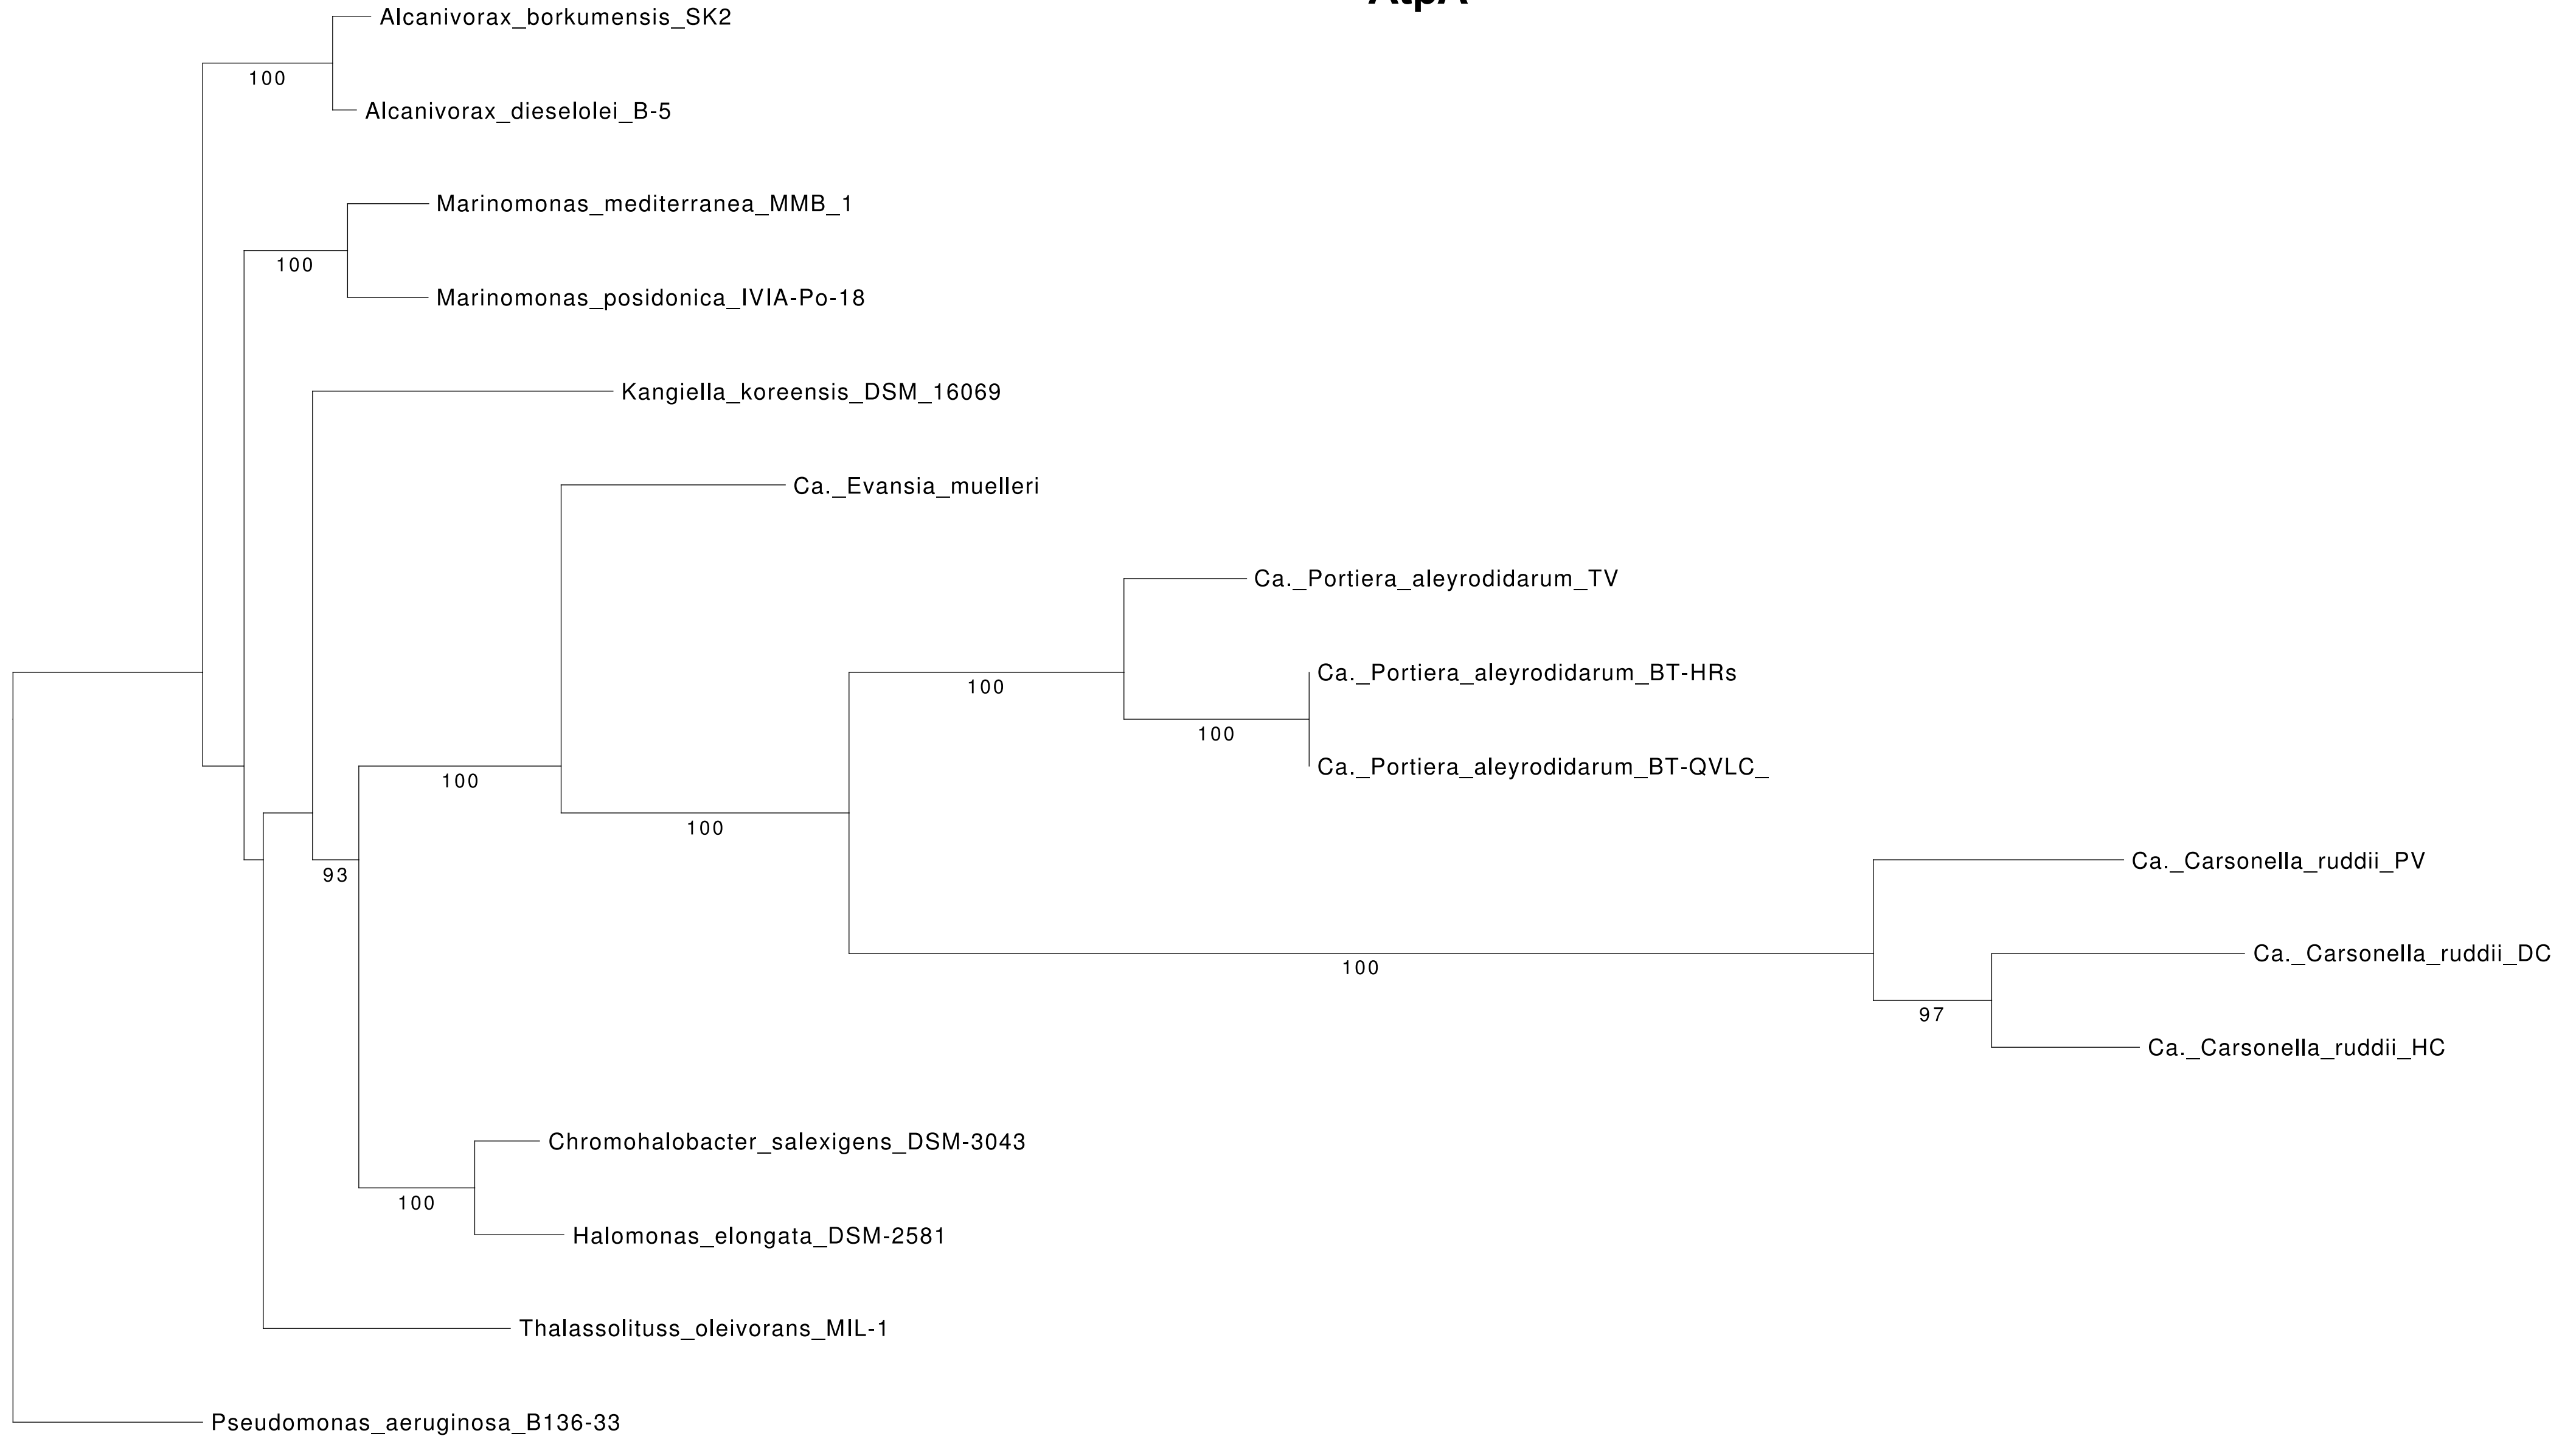

# AtpD

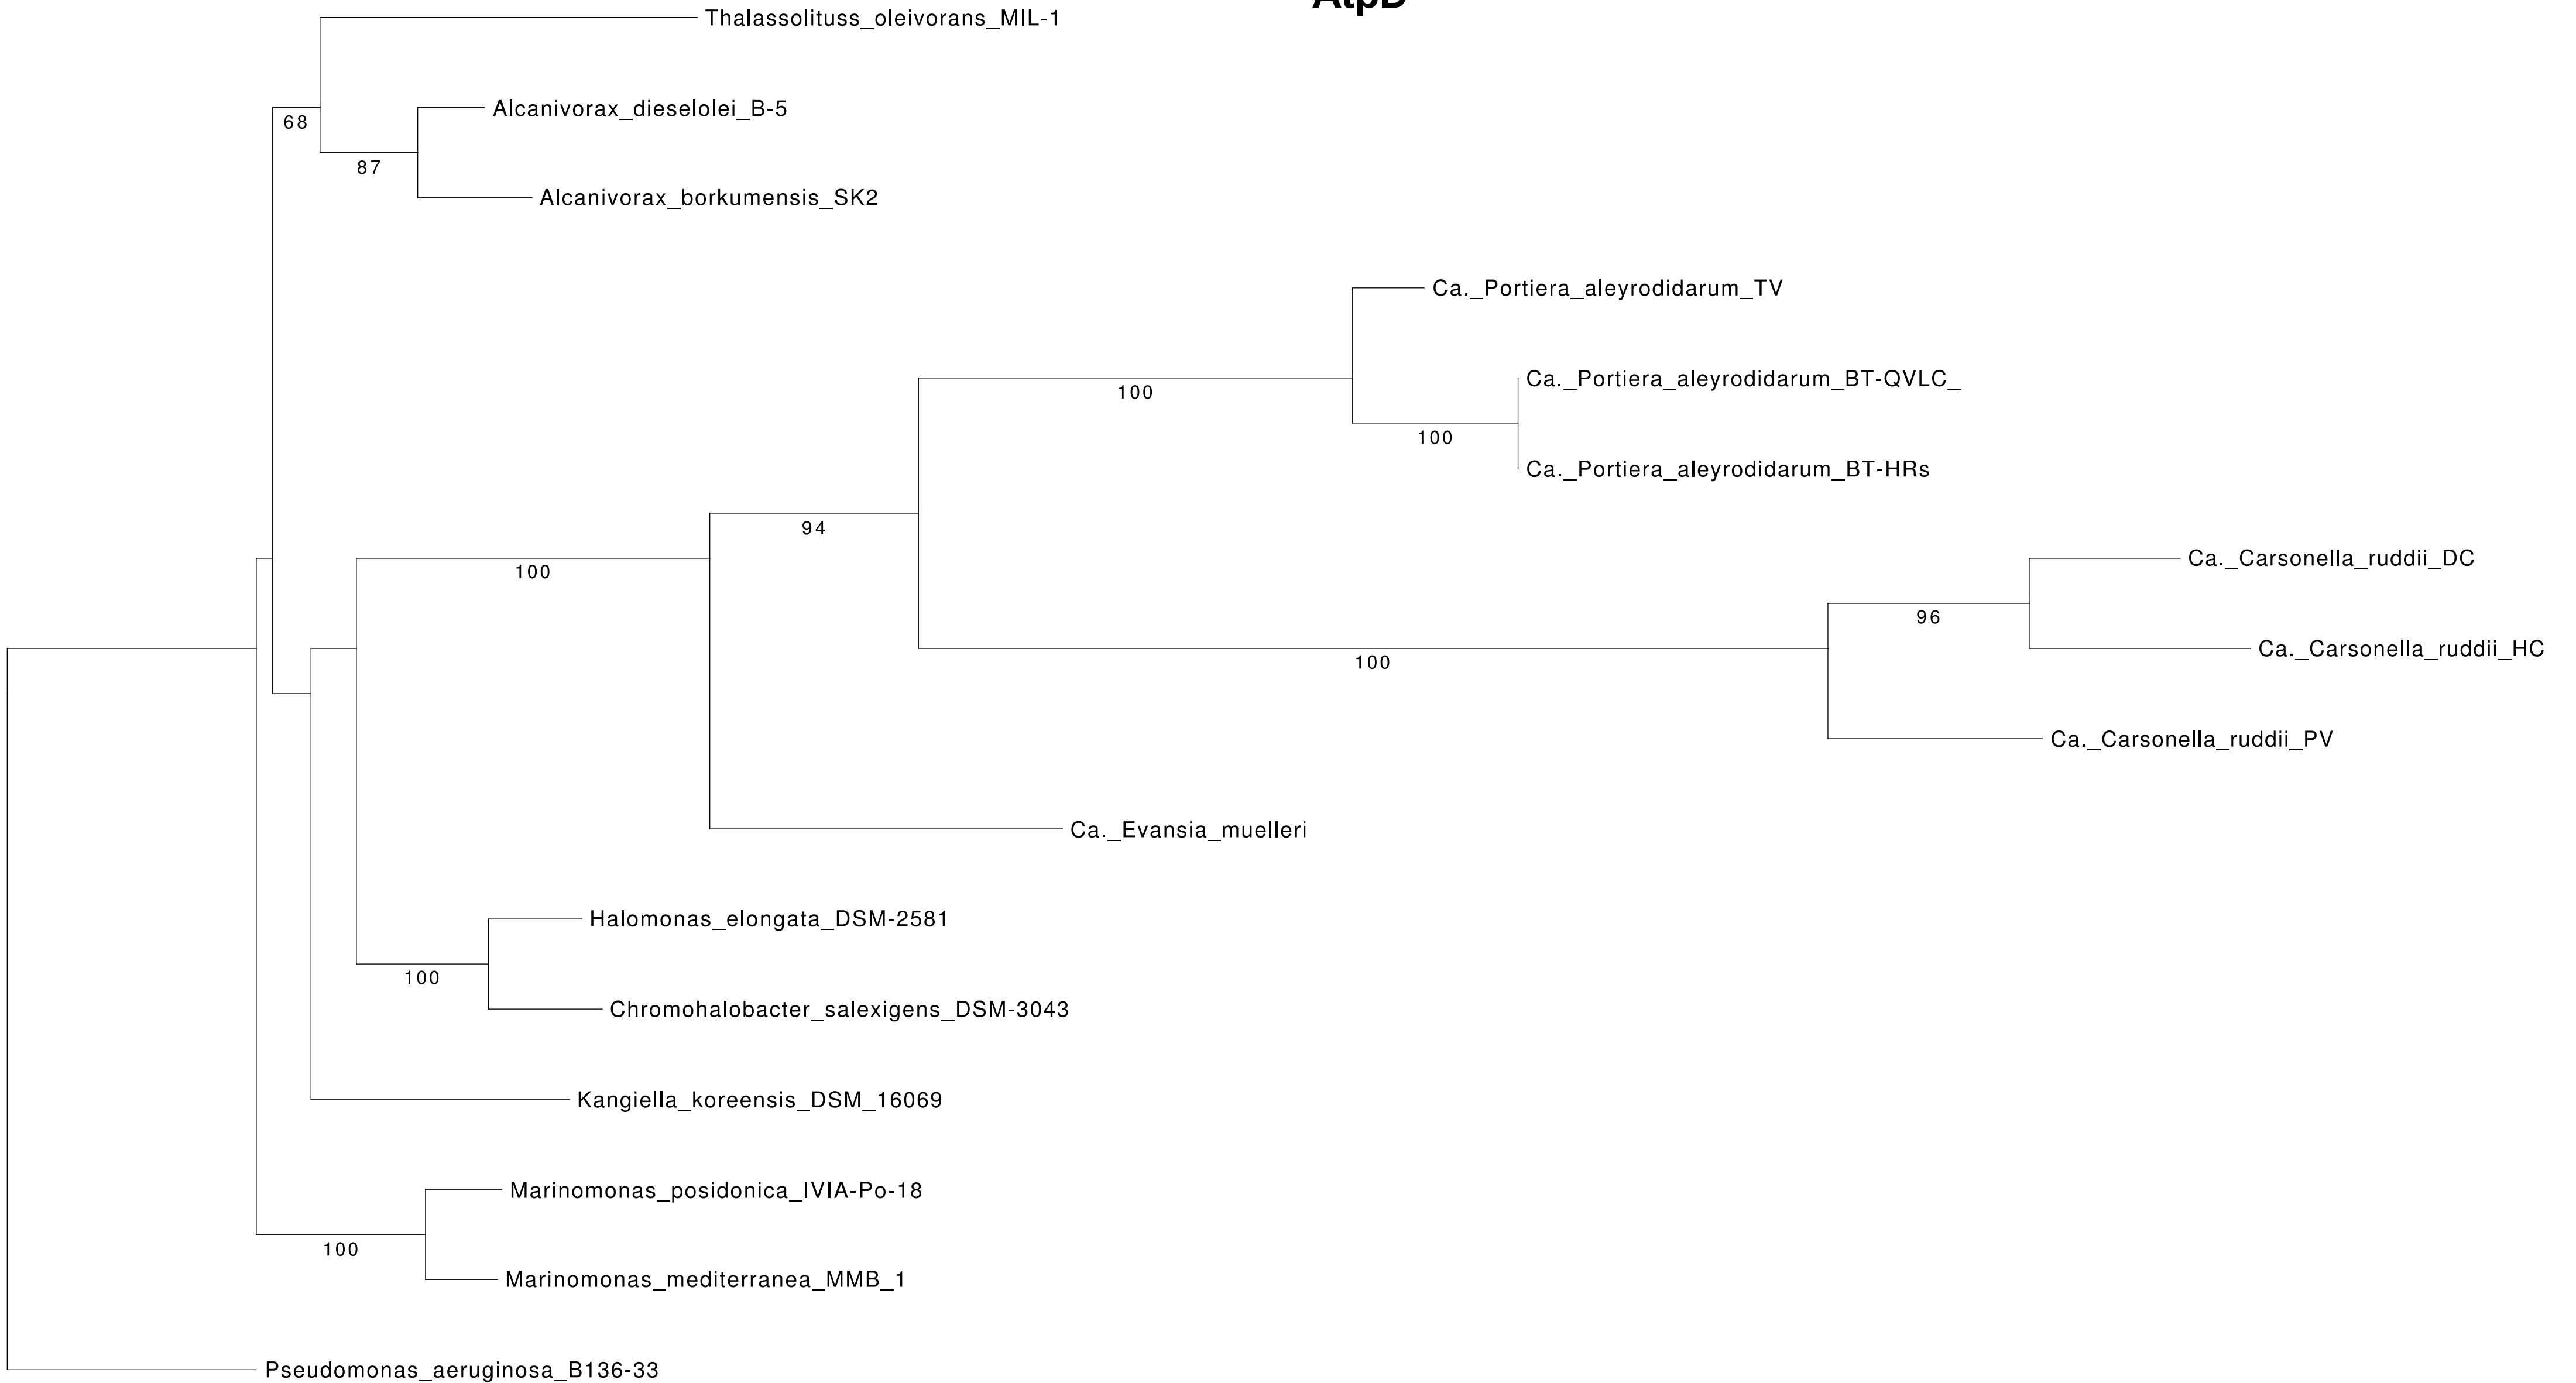

# CarB

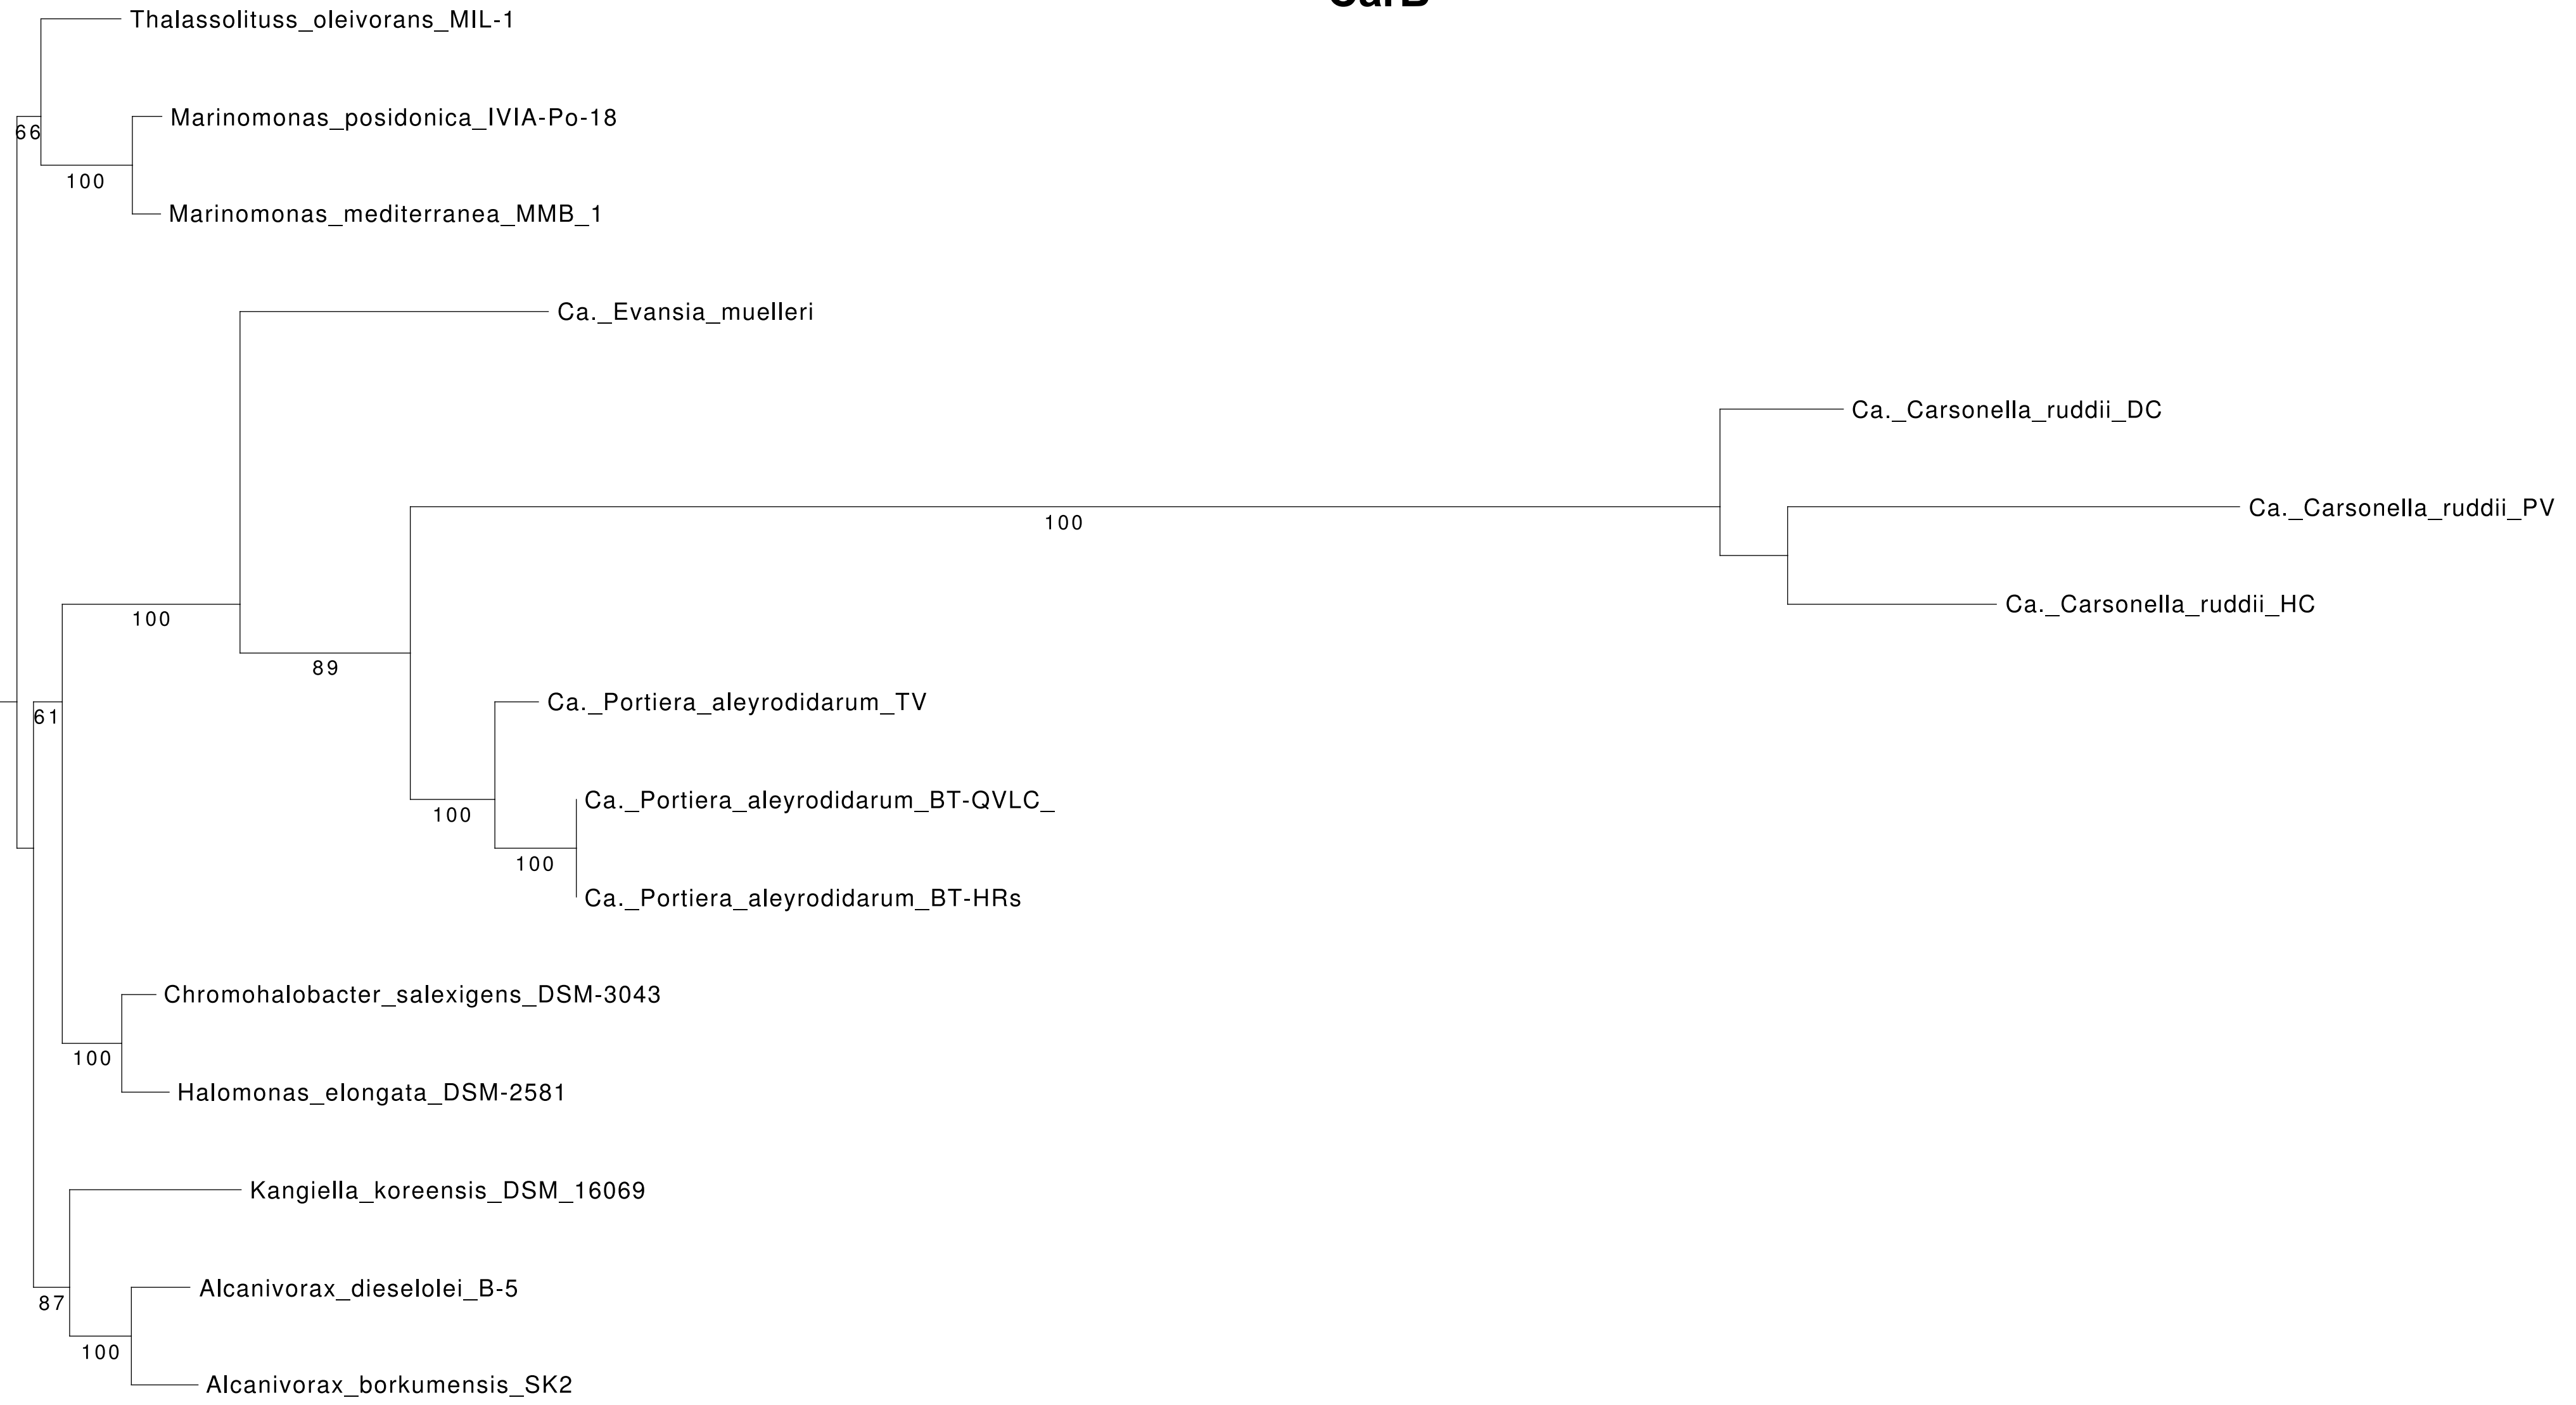

0.1

# DnaB

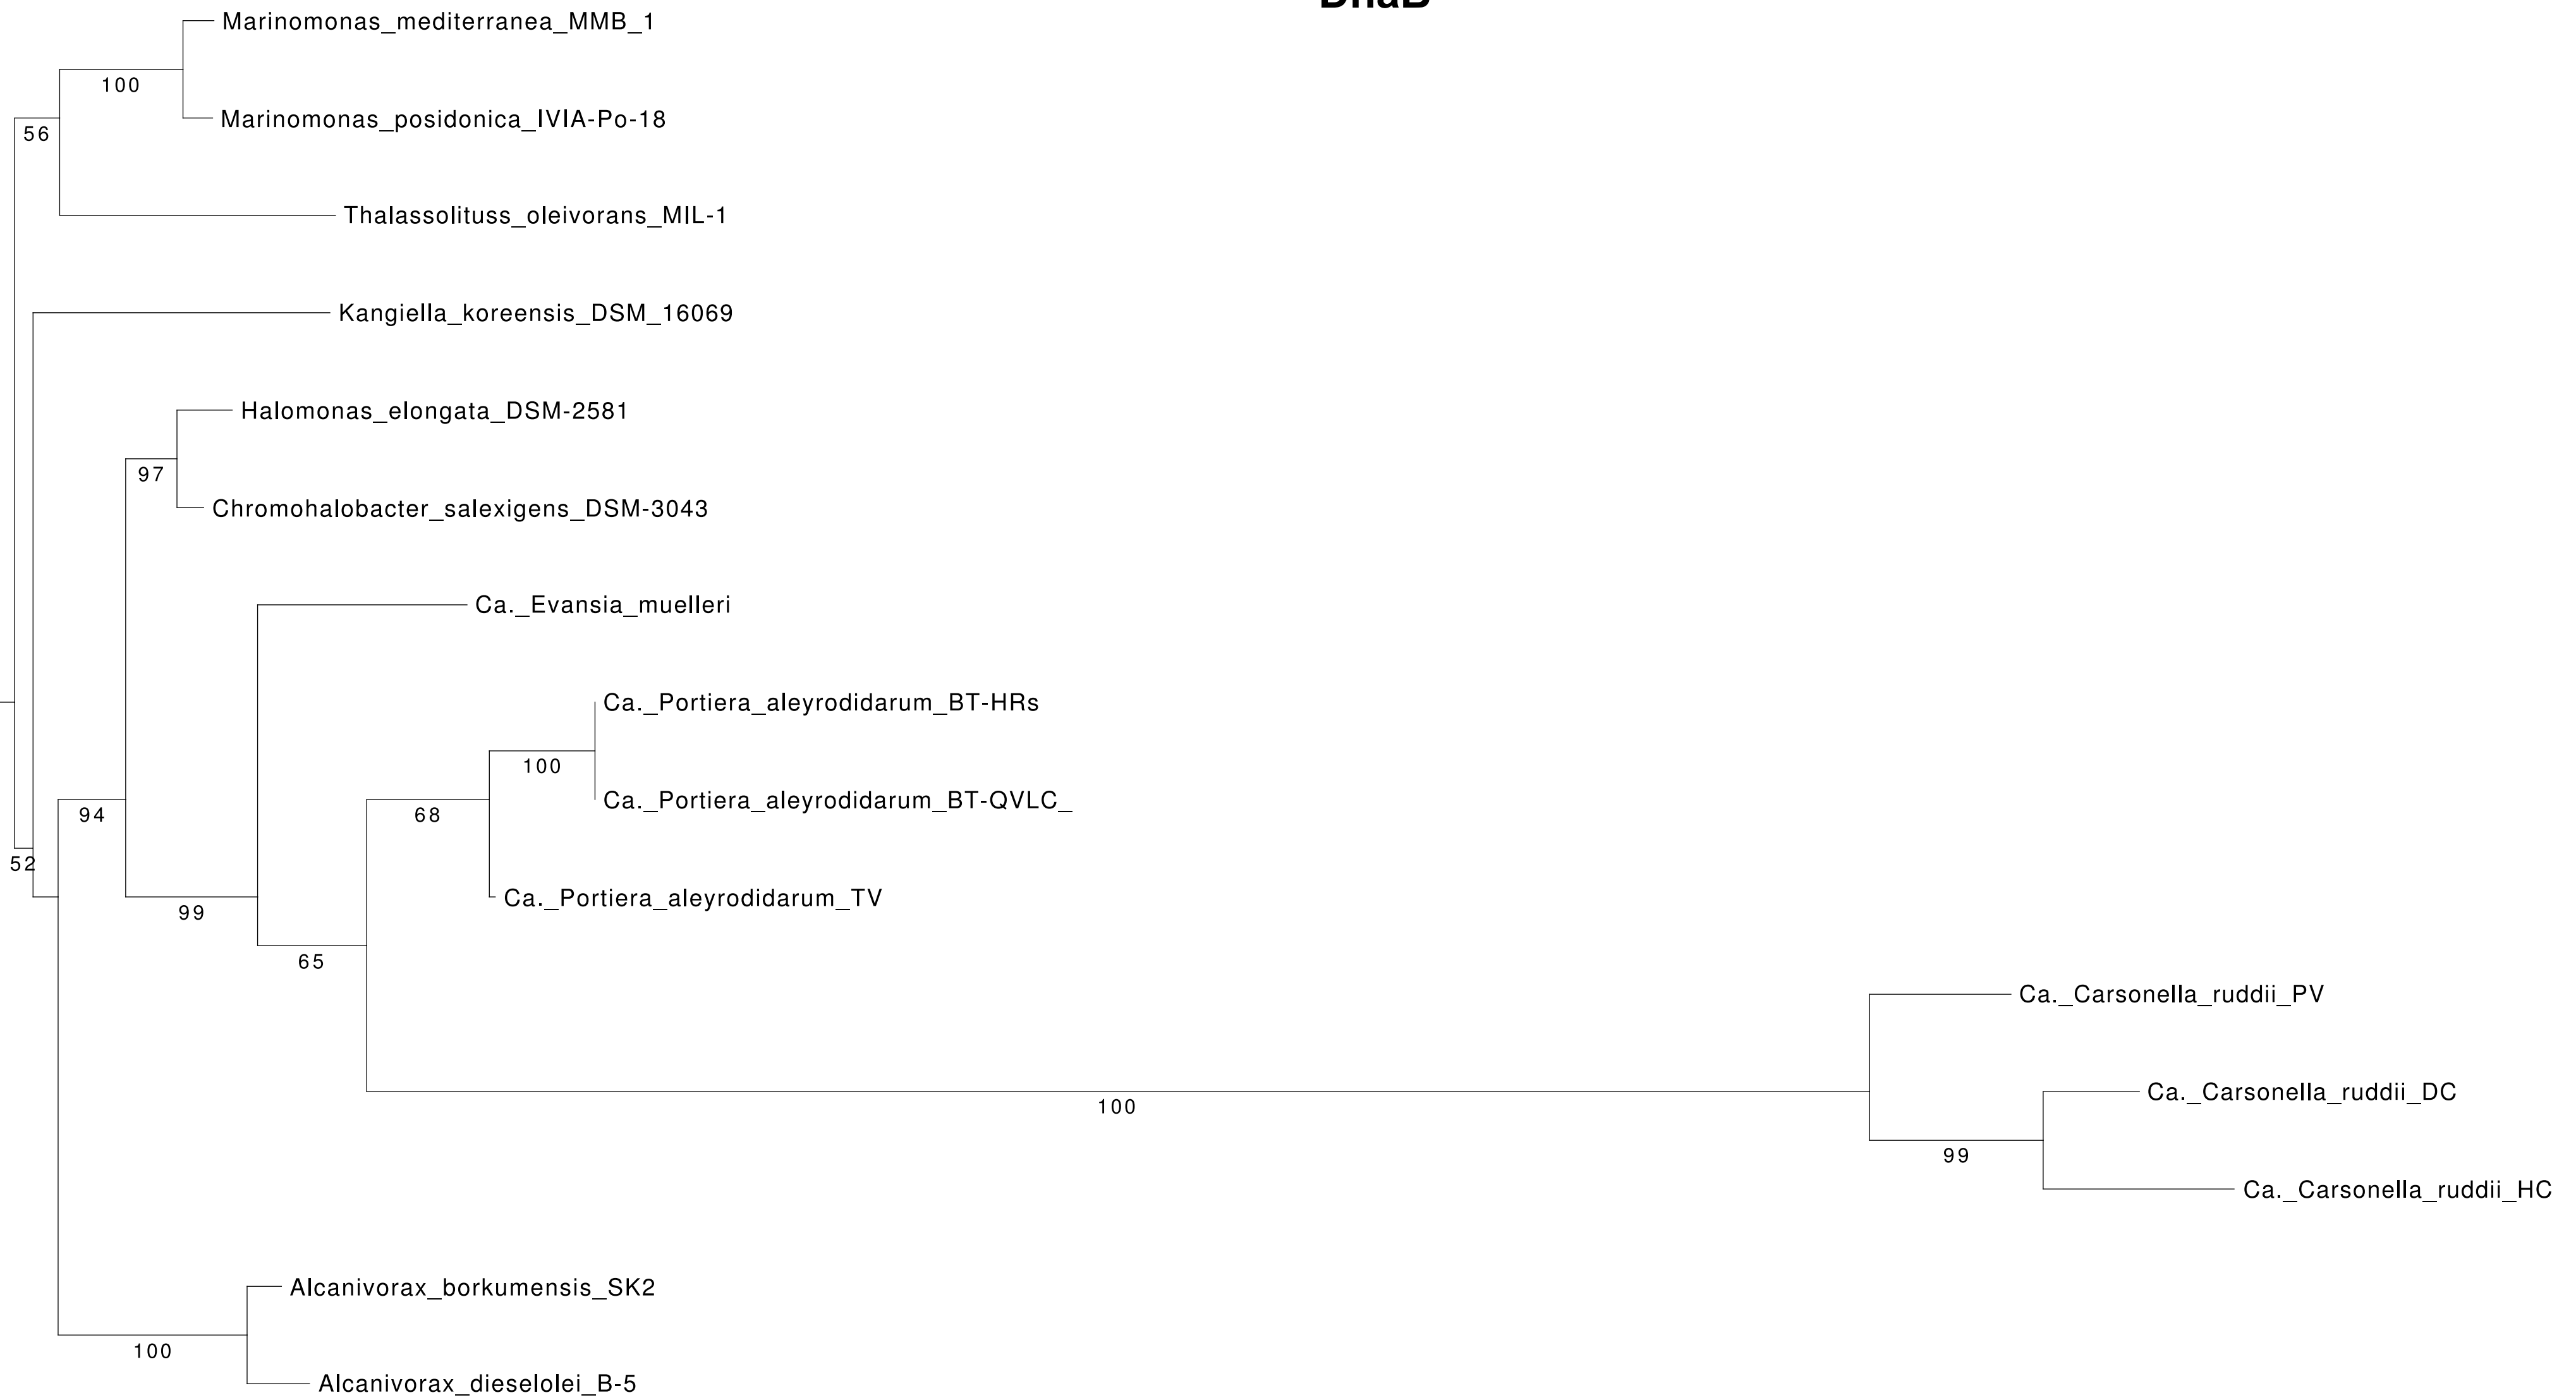

0.1

# DnaE

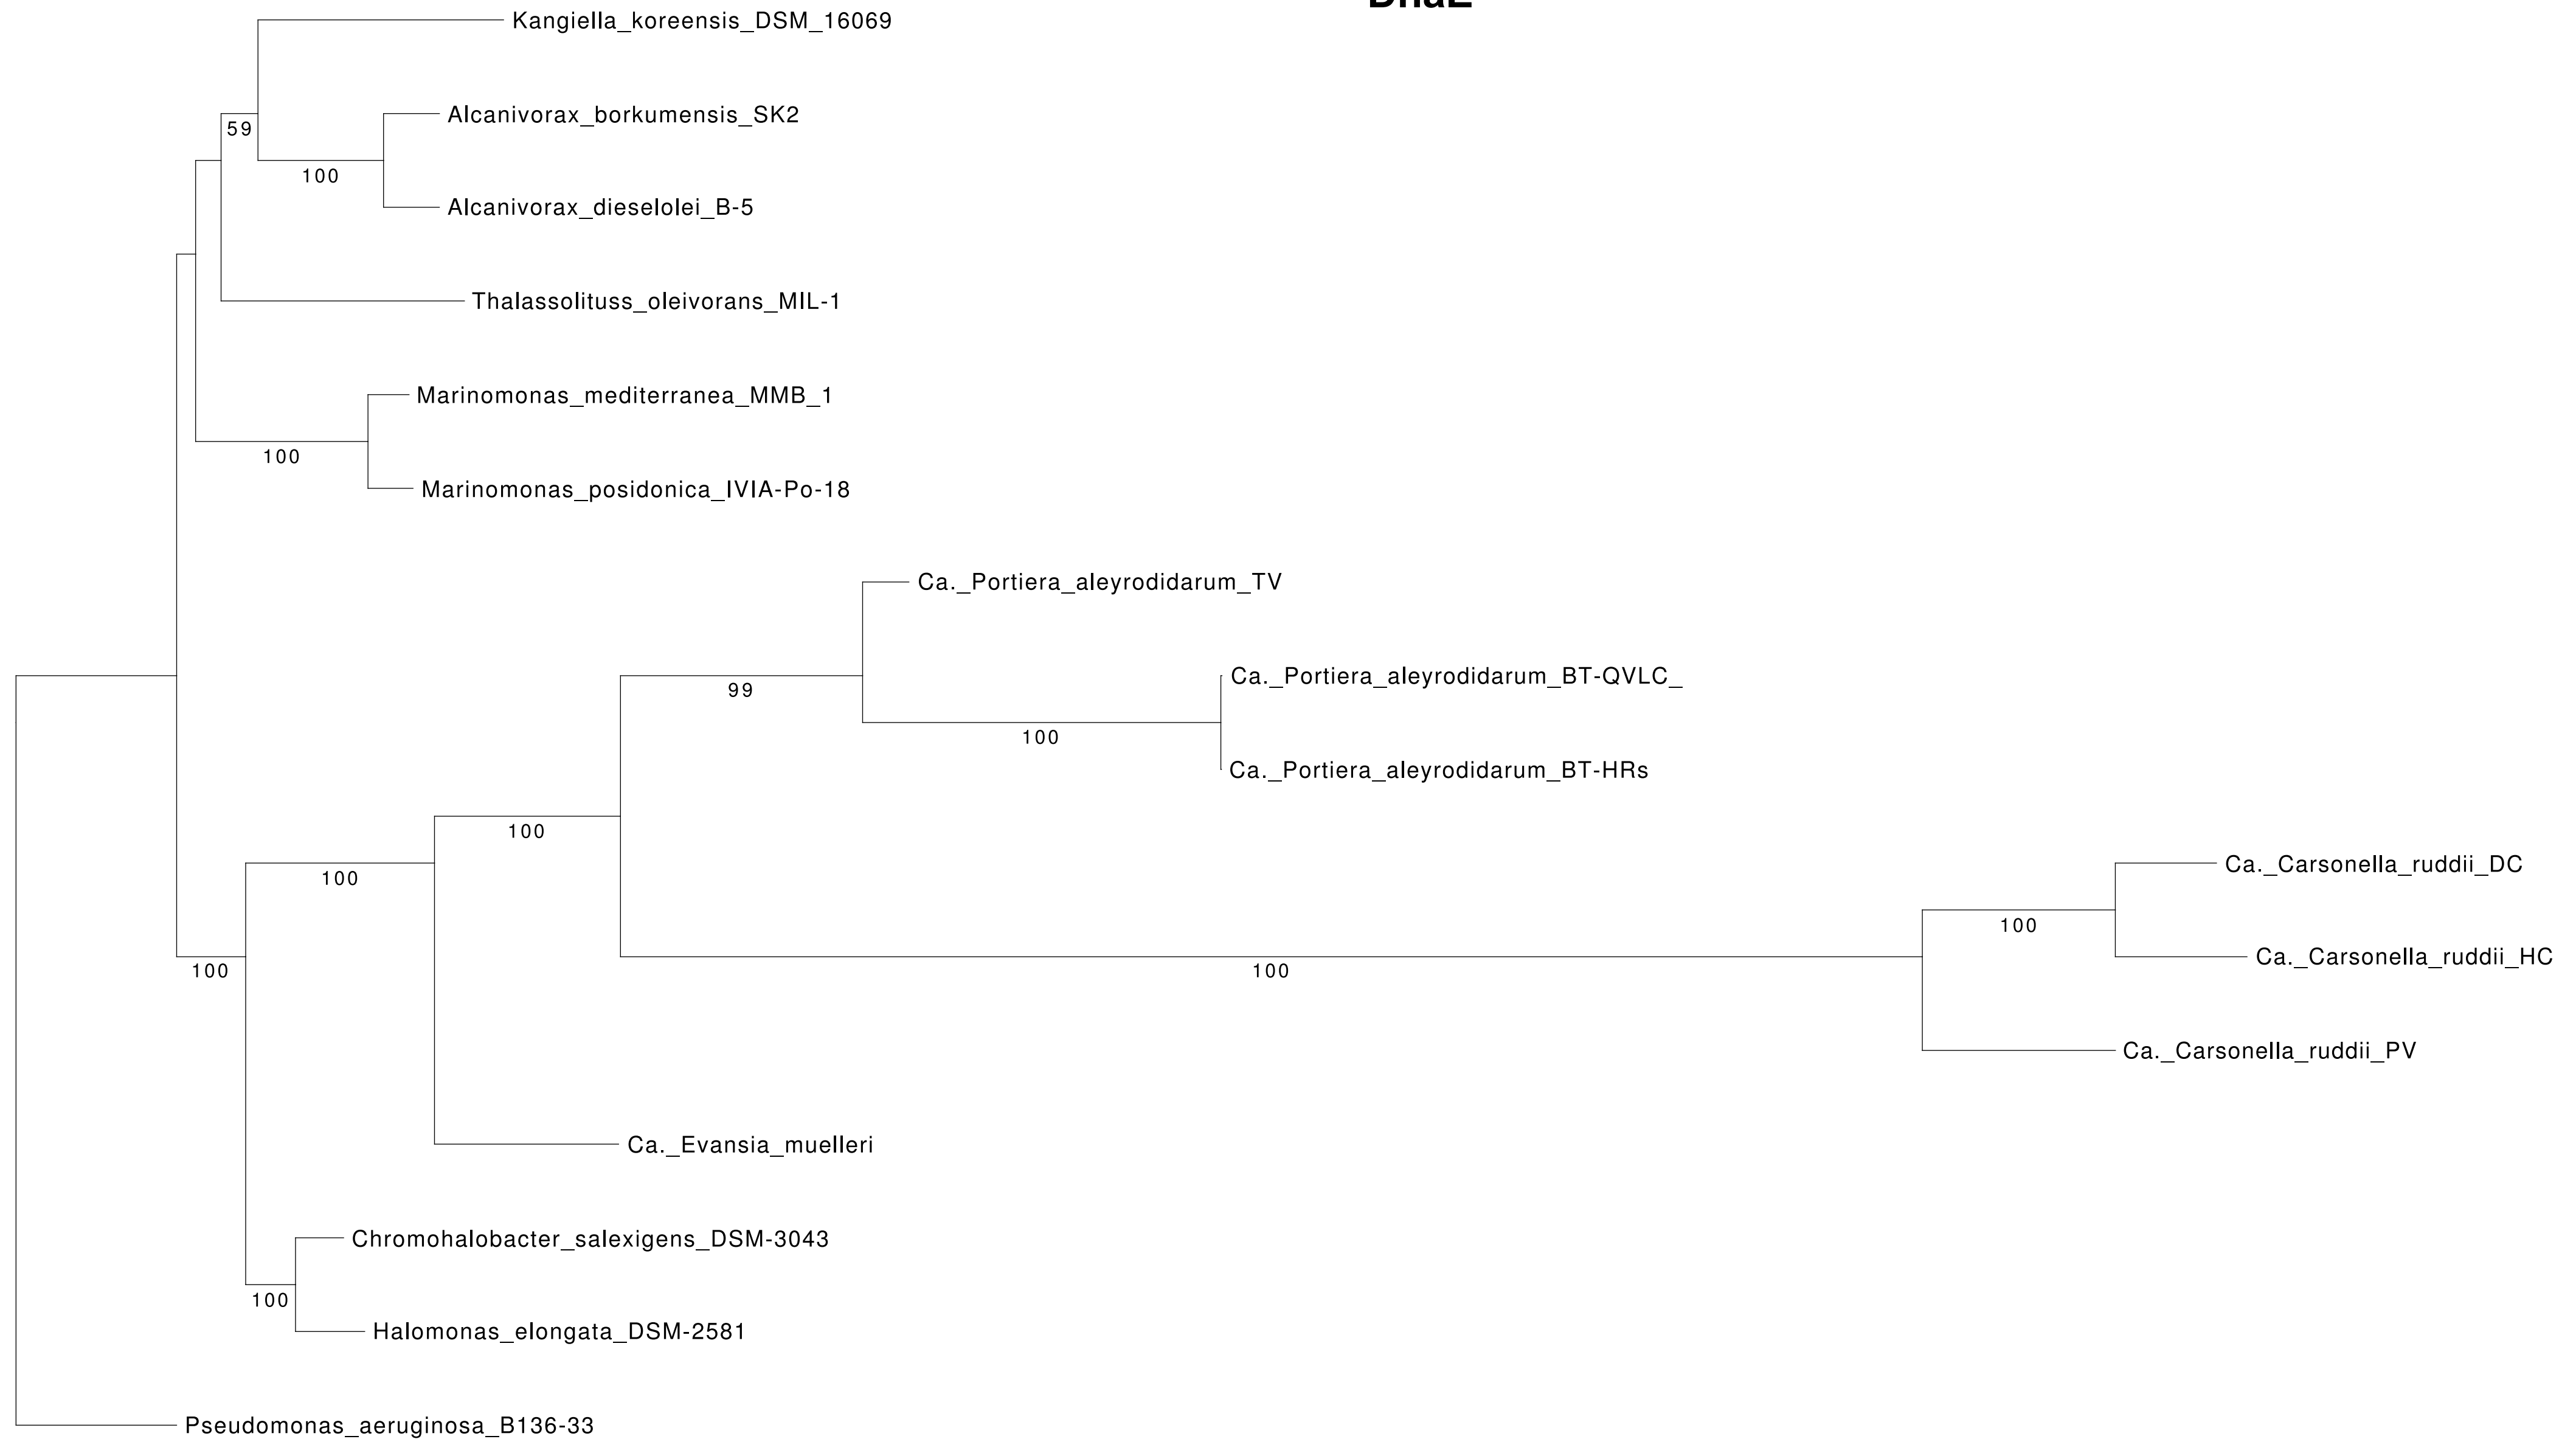

# DnaK

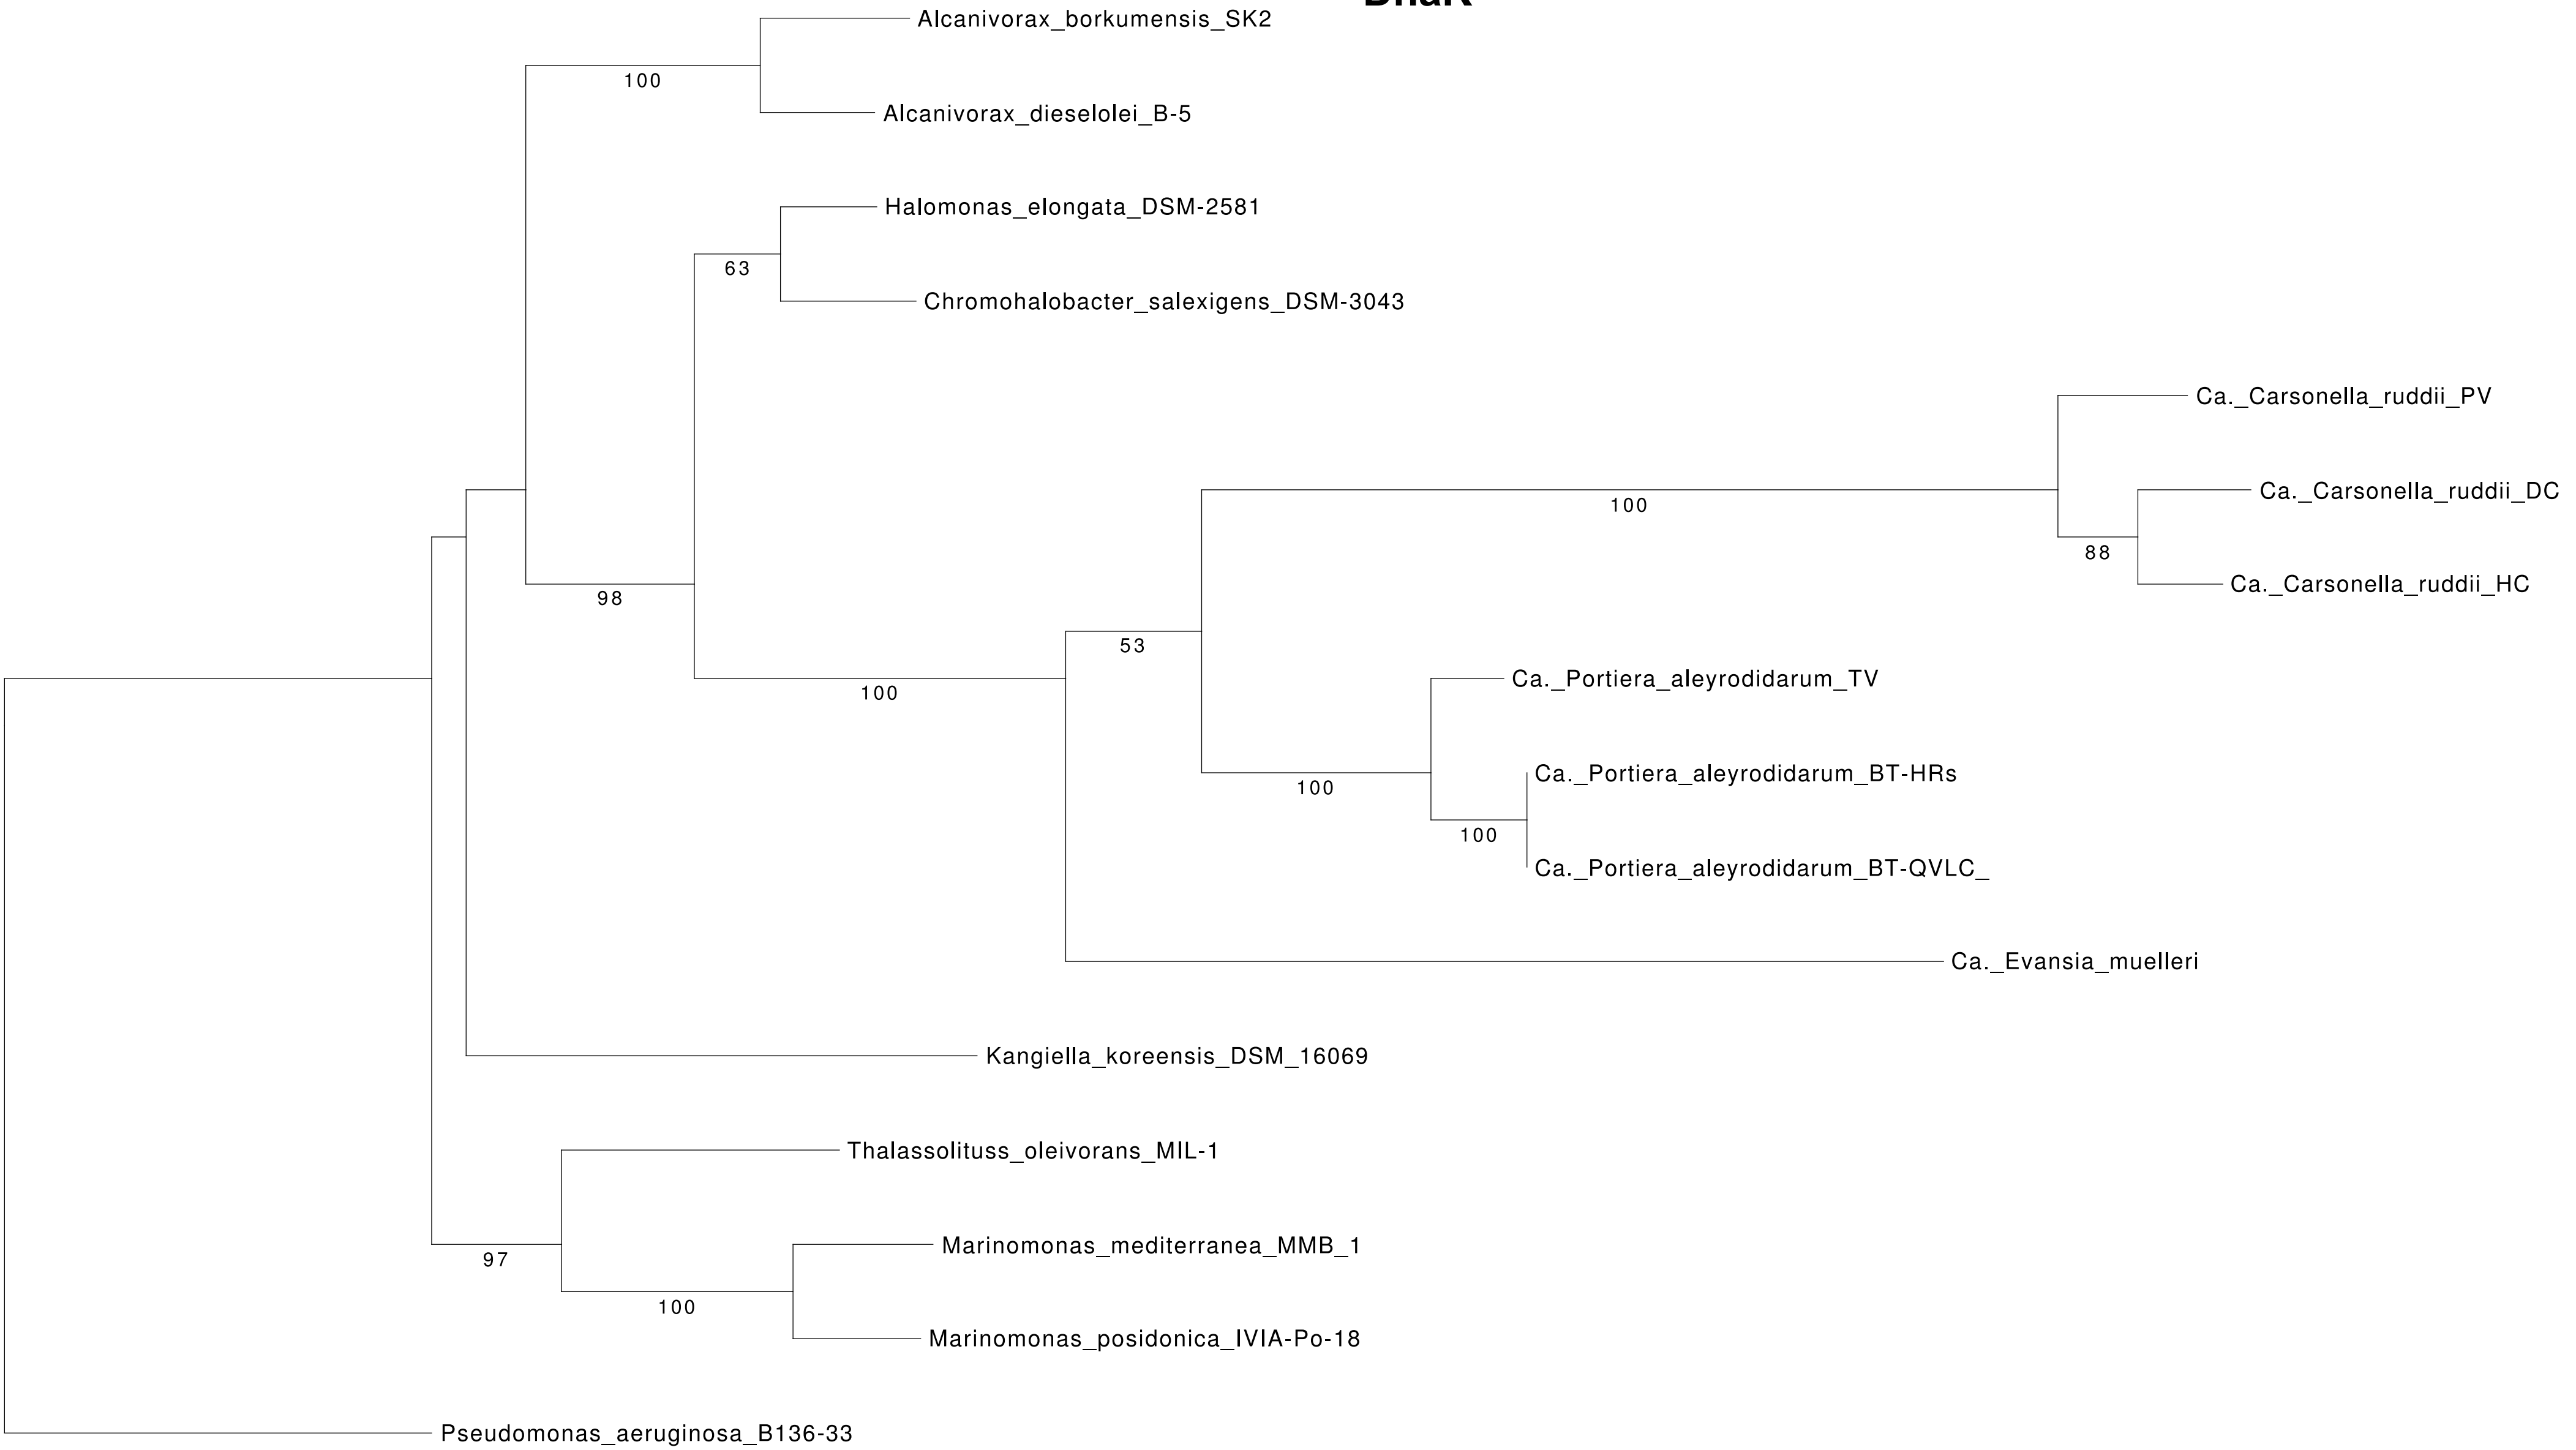



# FusA

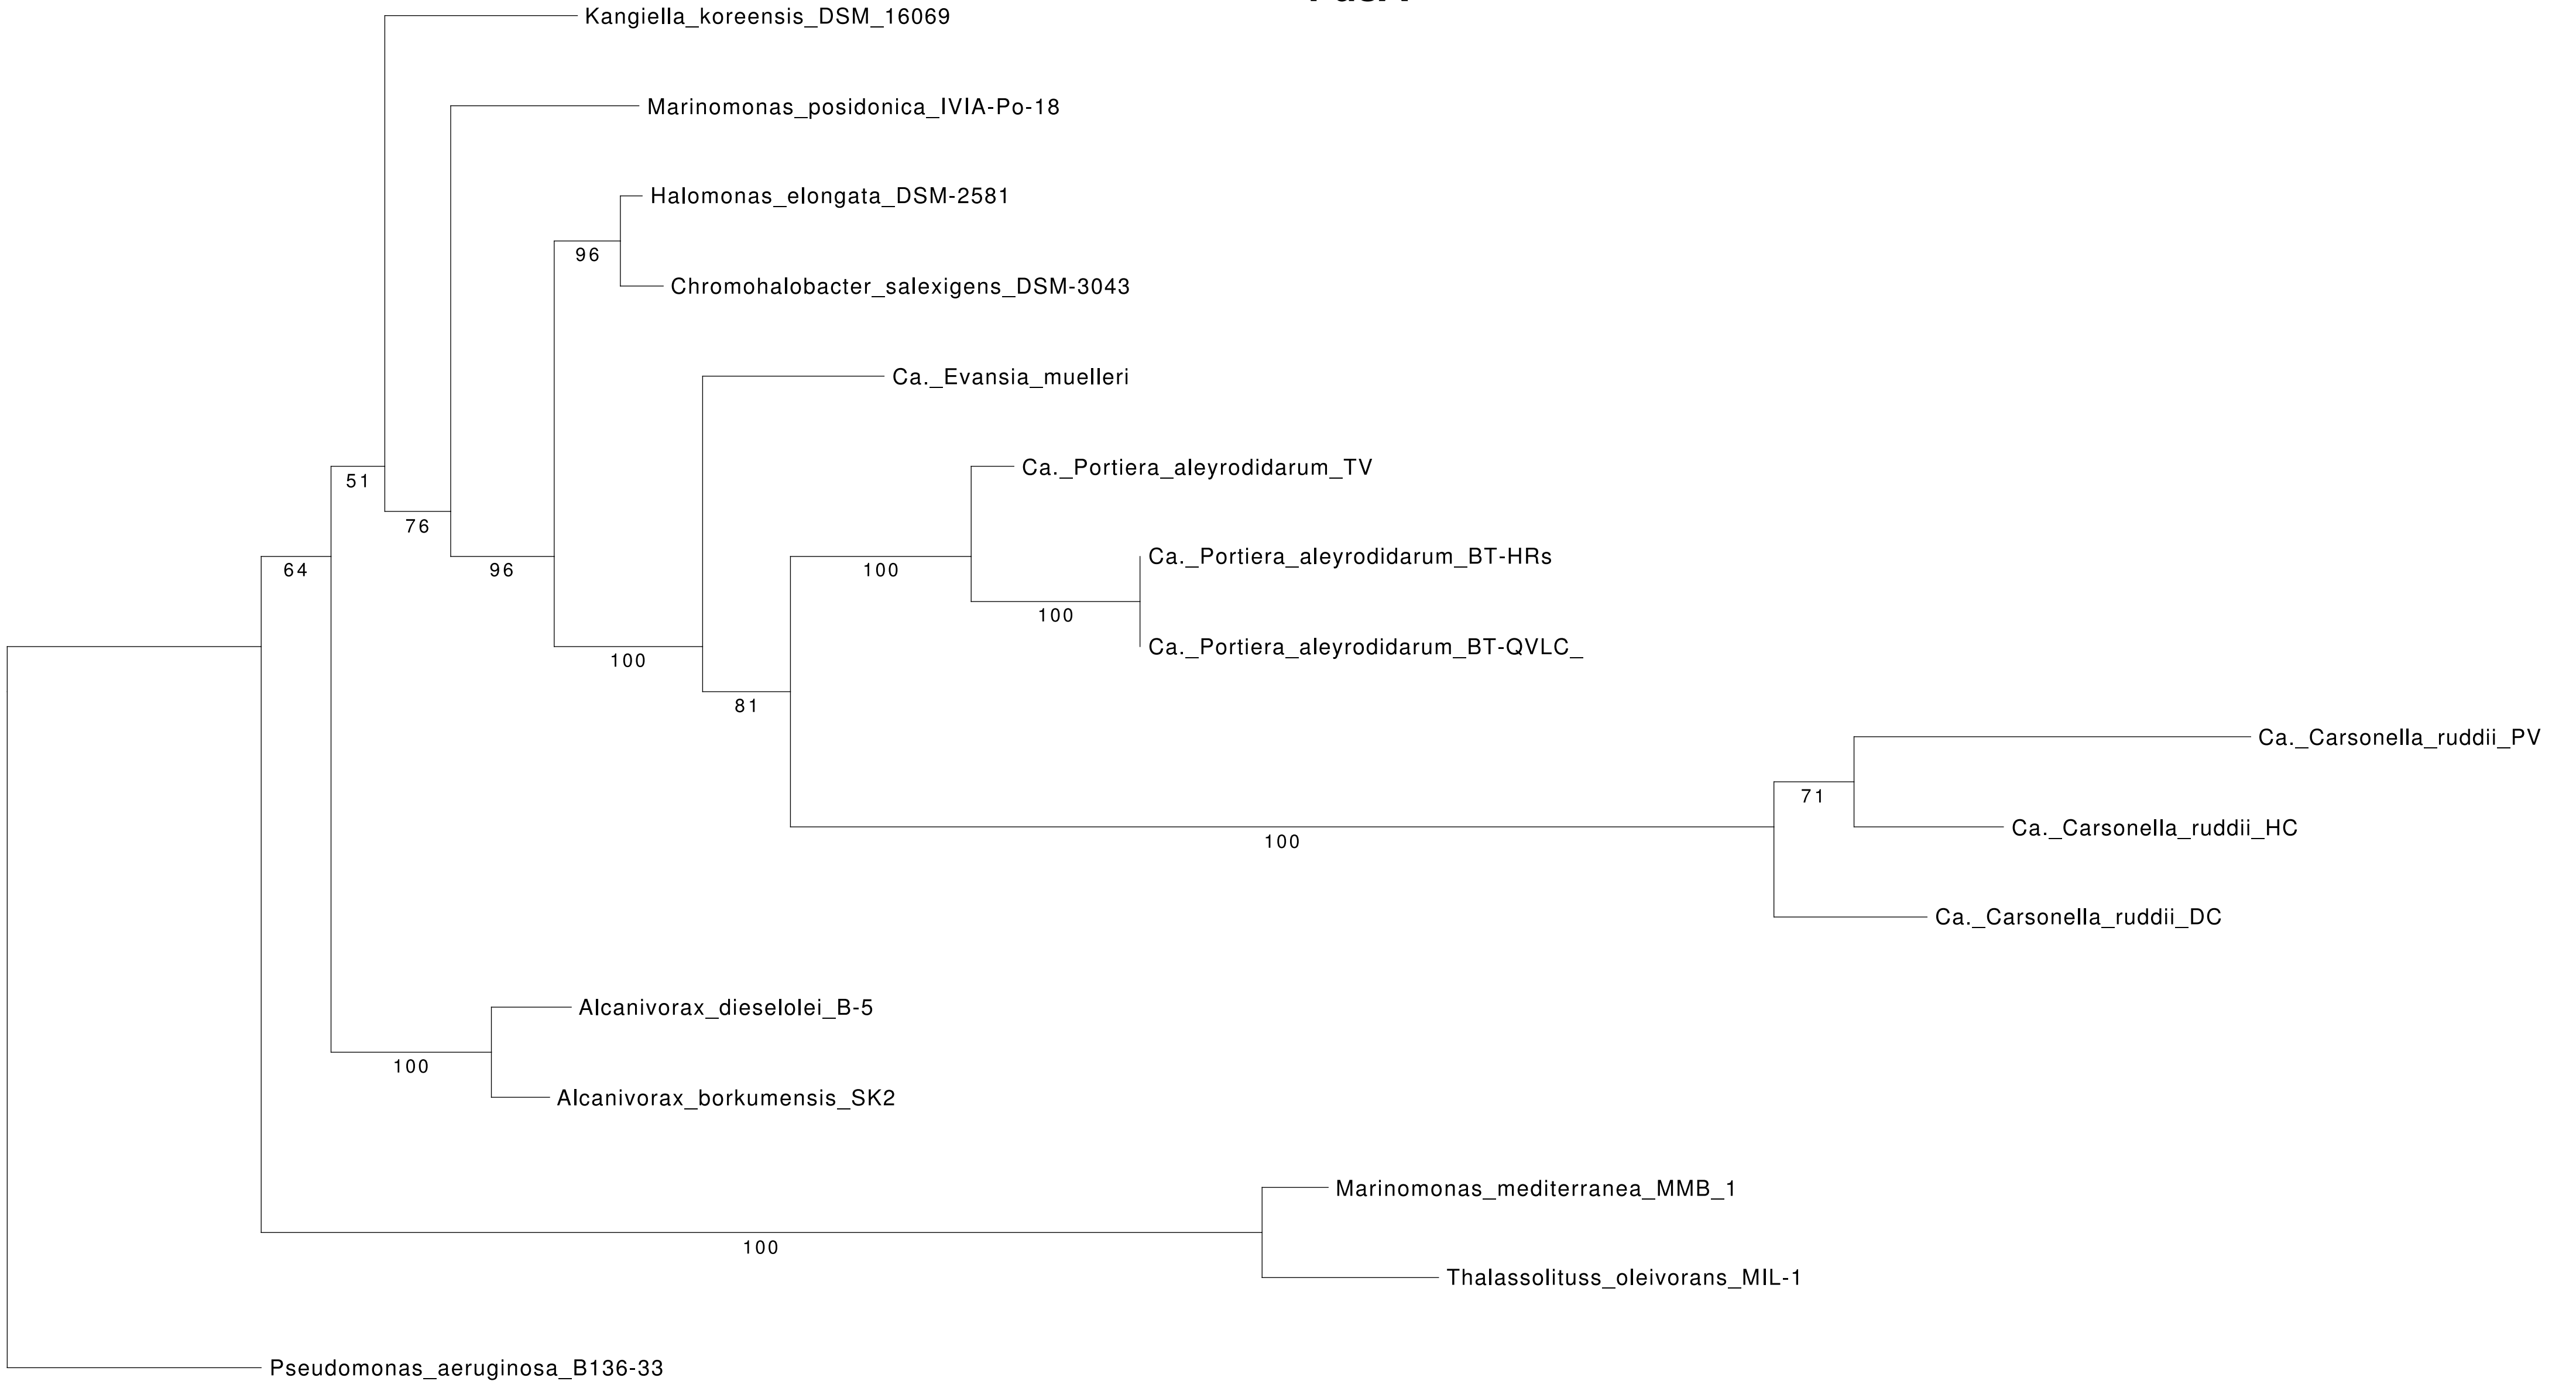

# GroEL

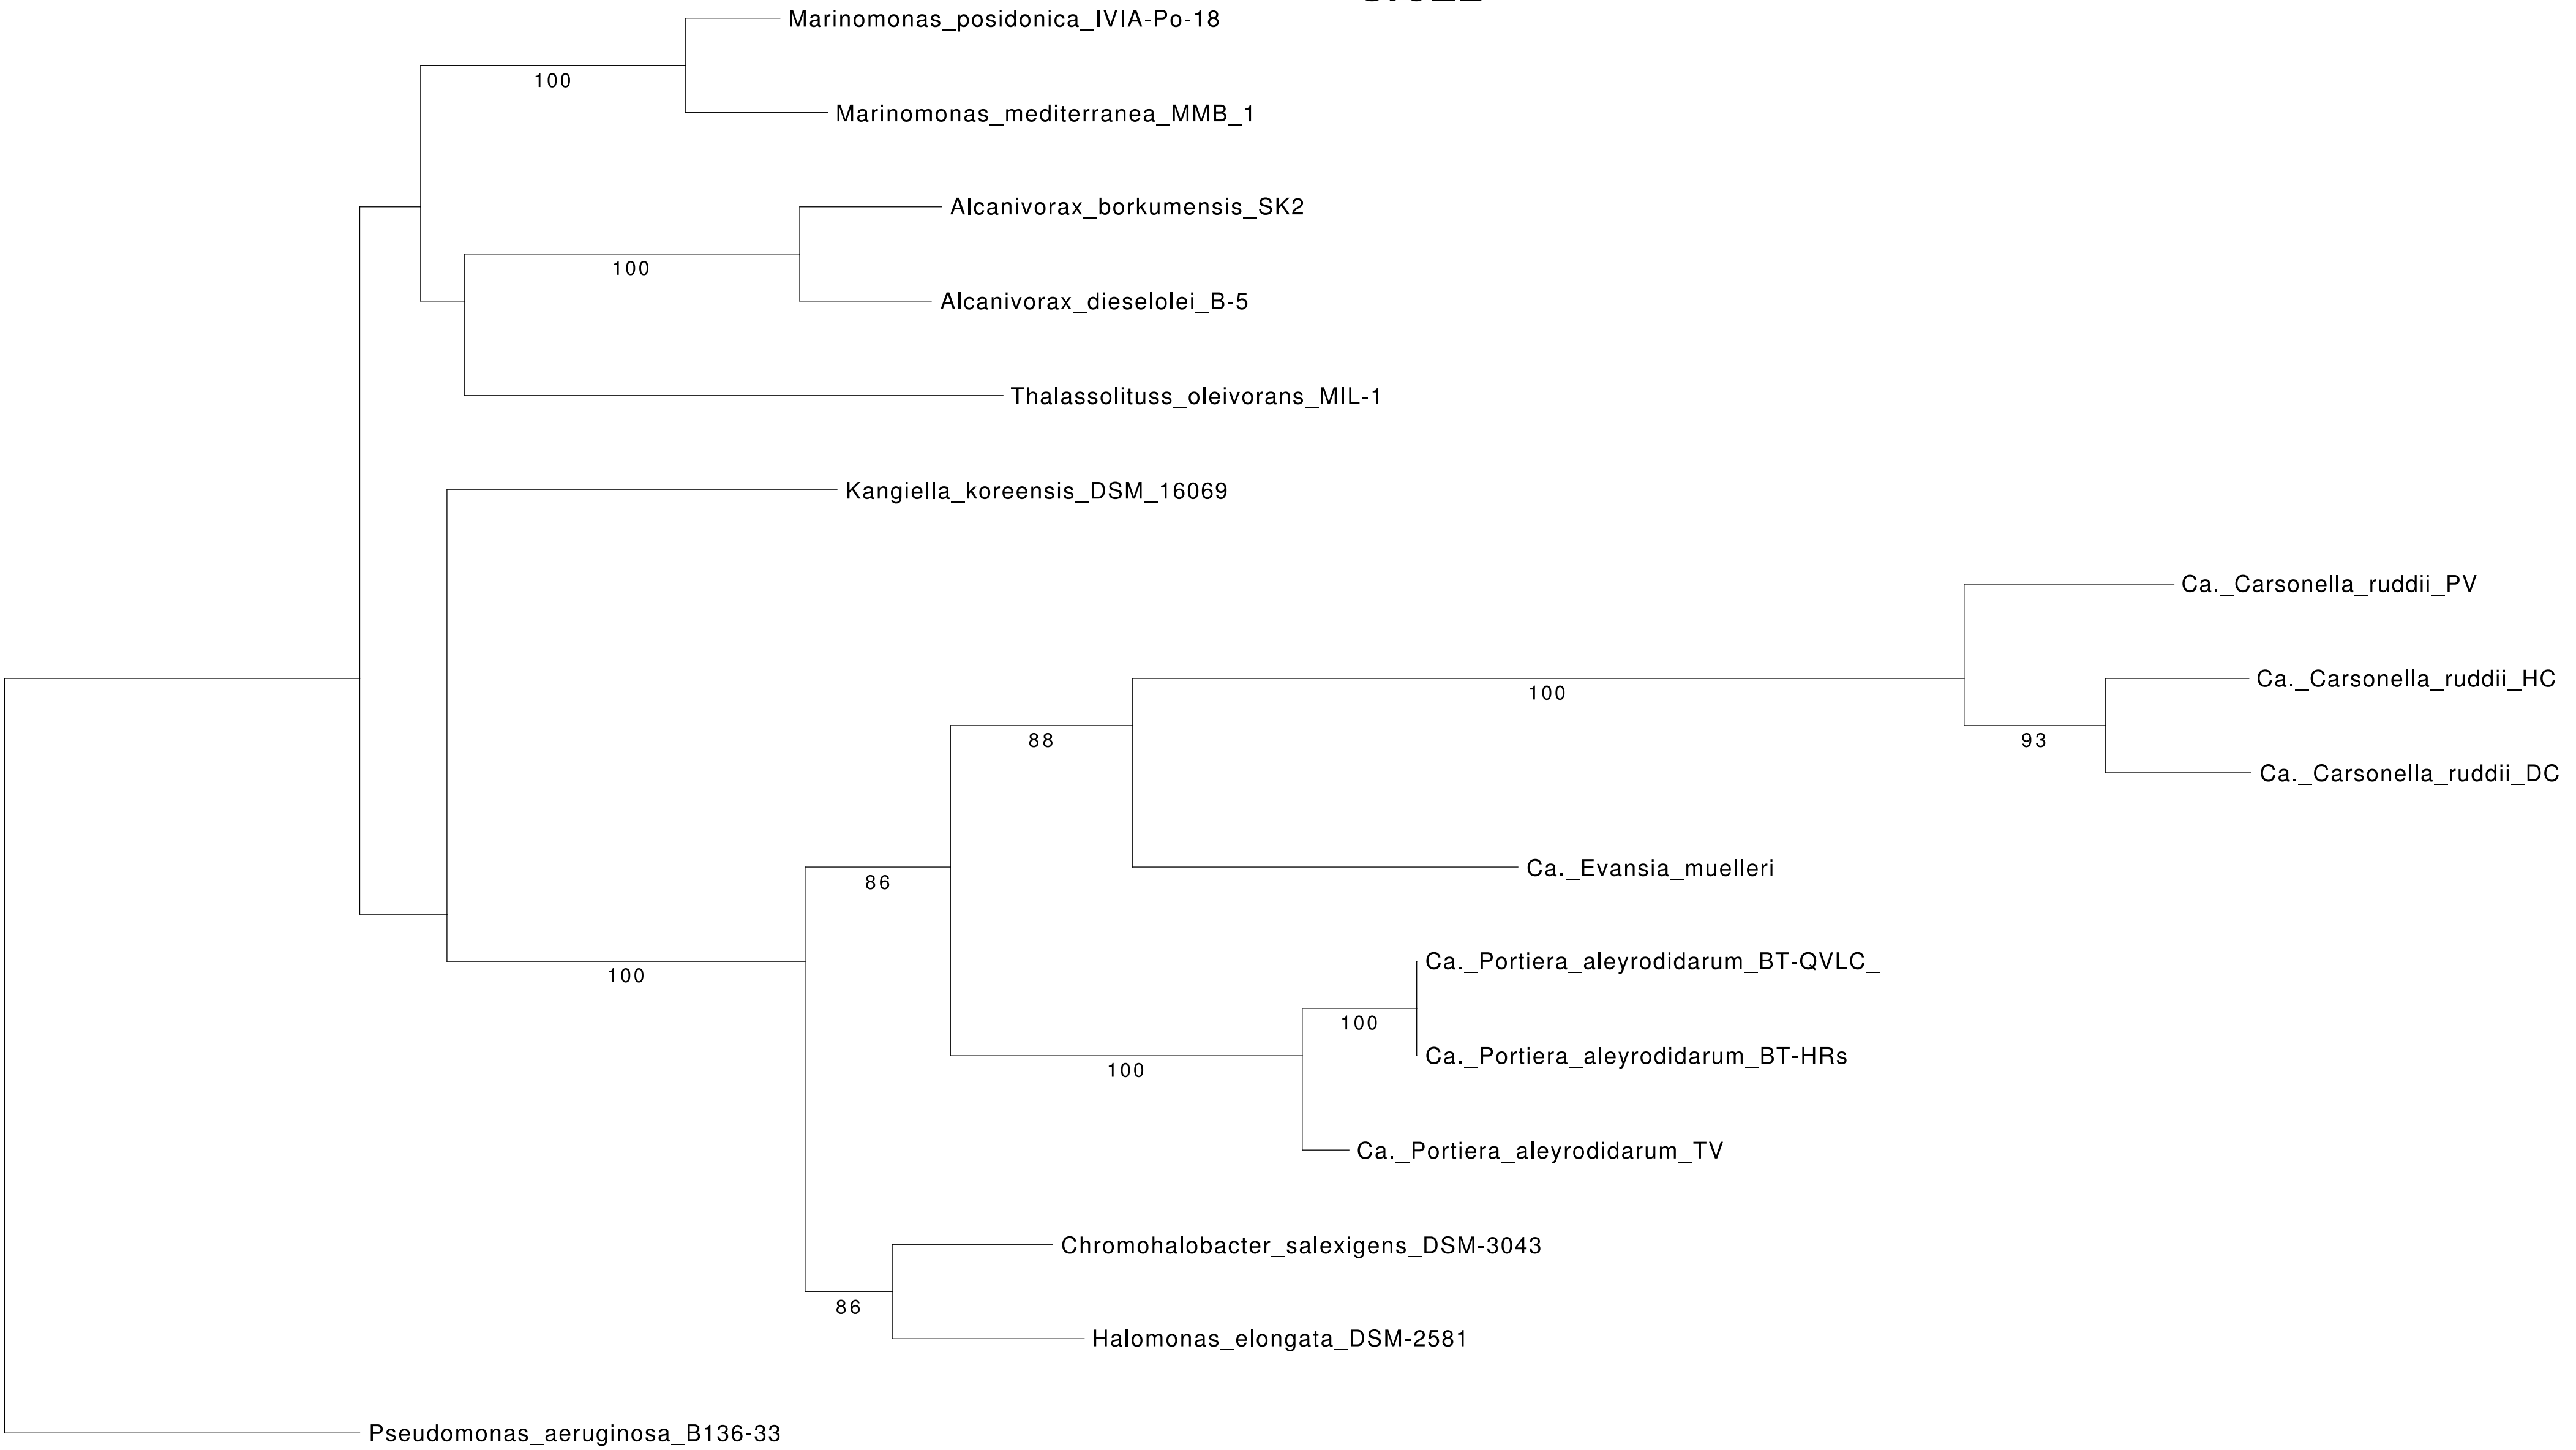

# IleS

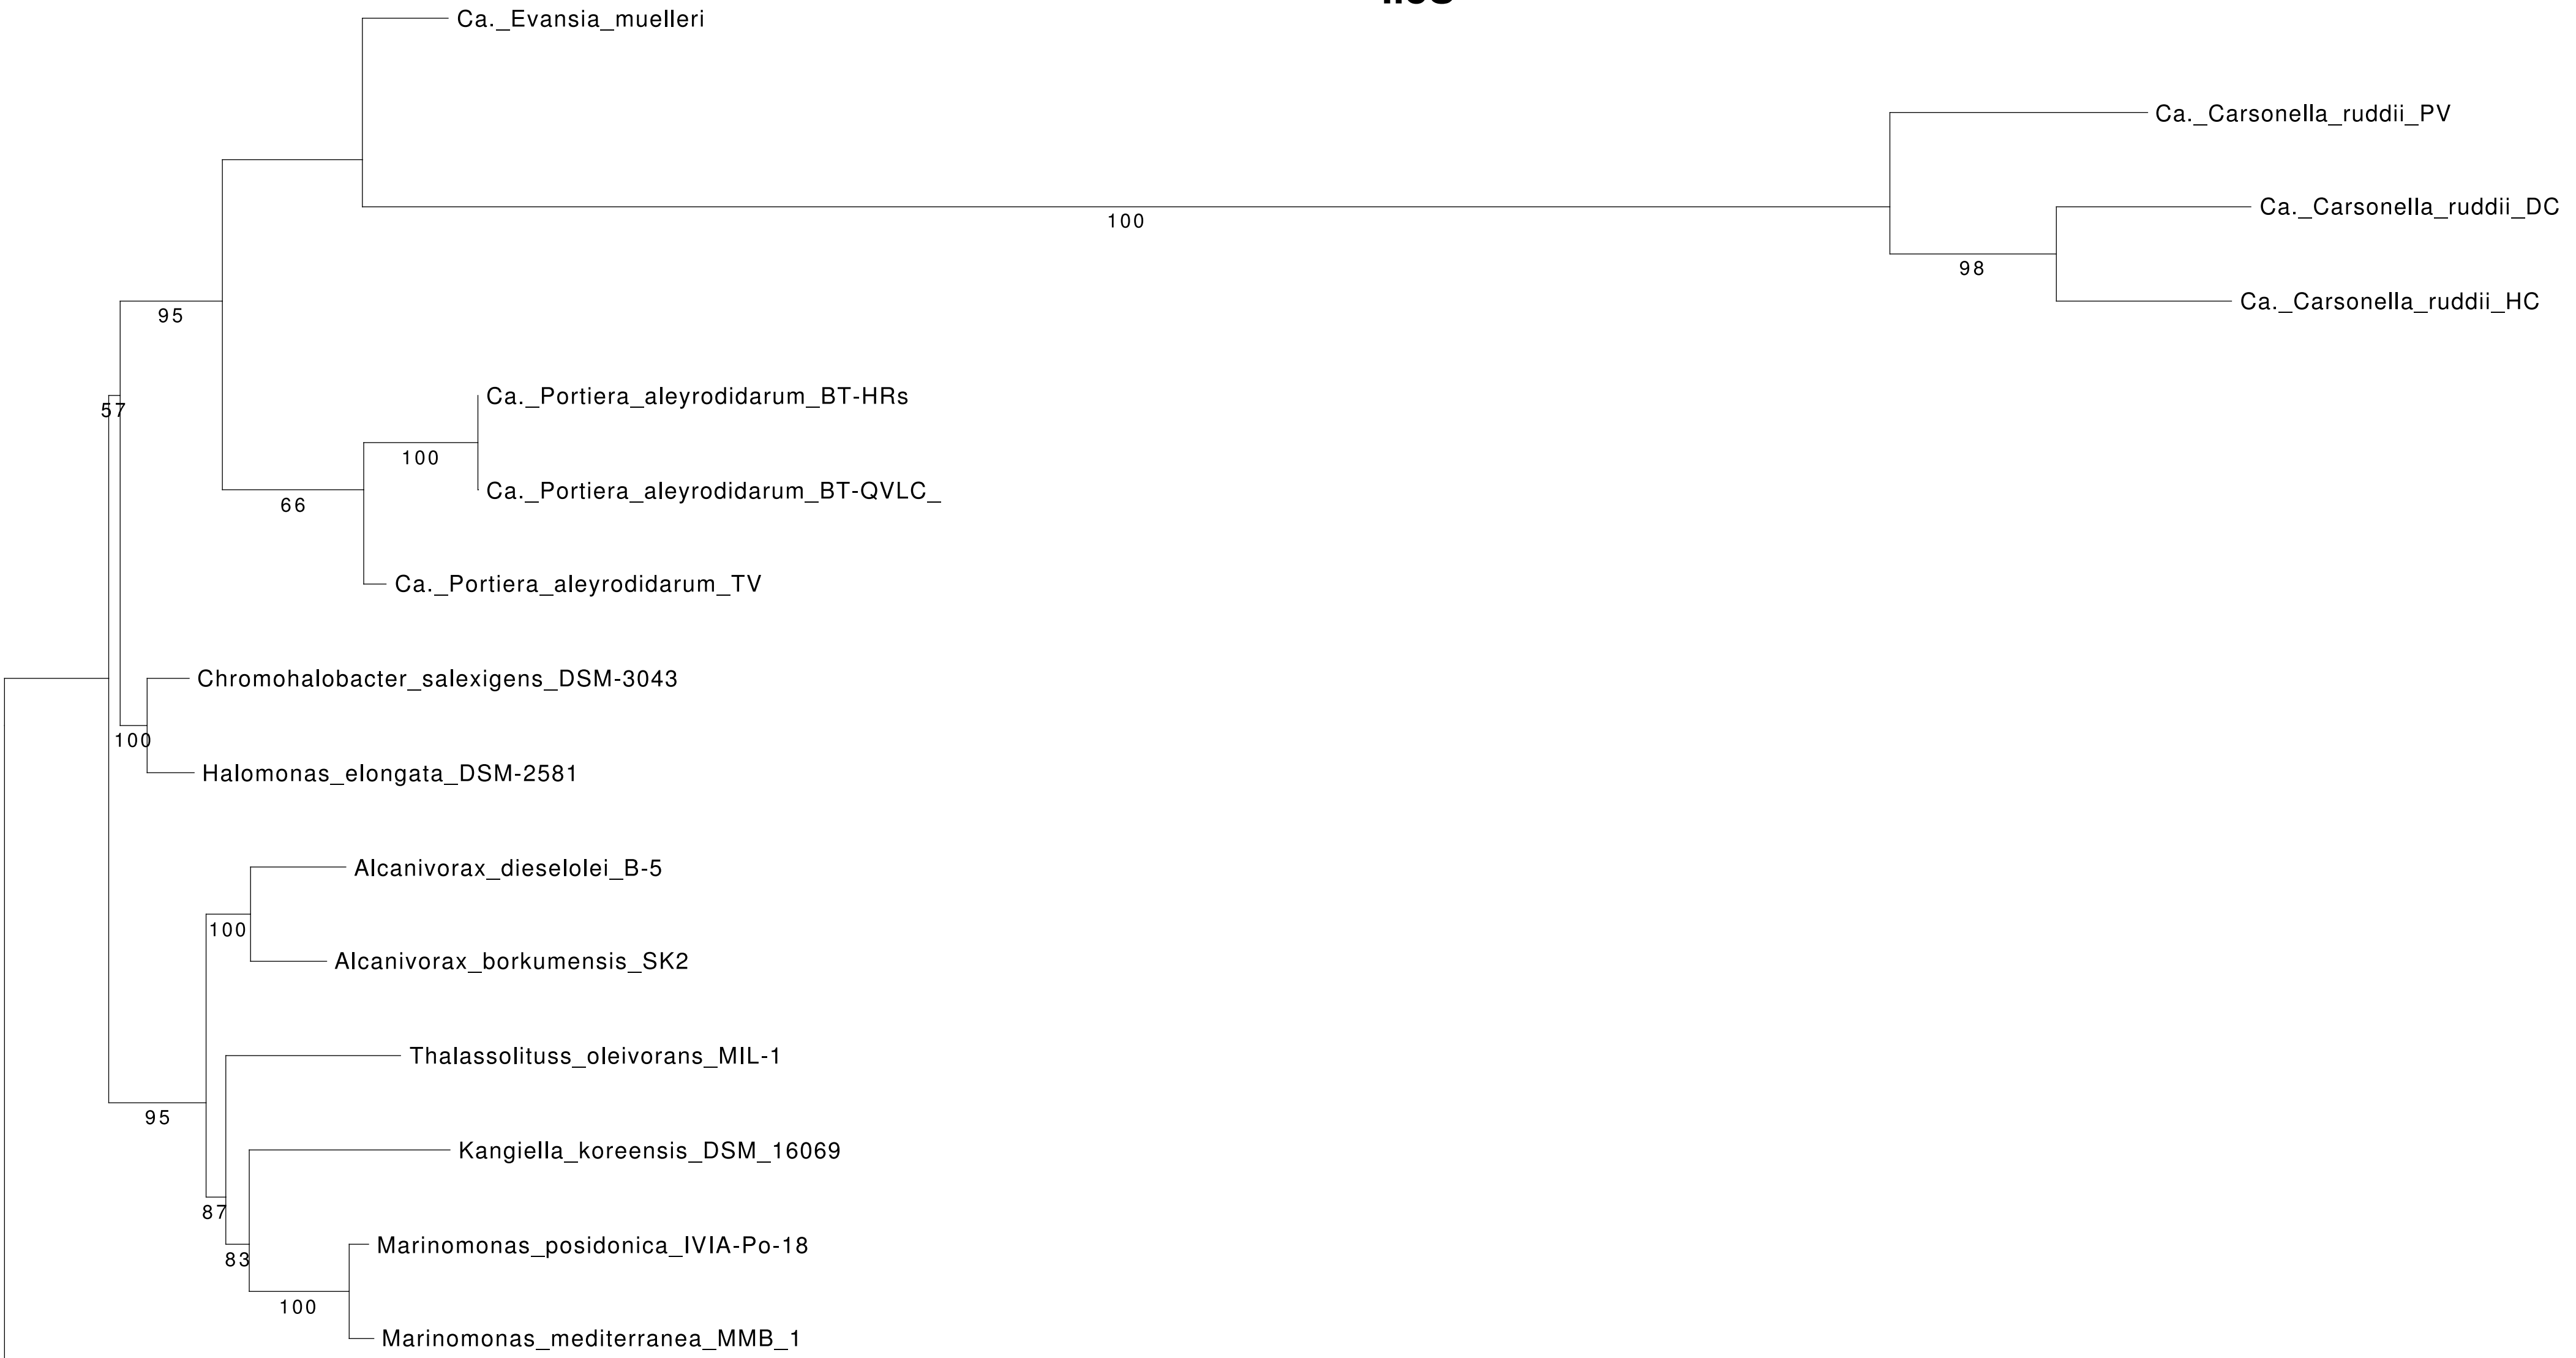

1.0

# LeuB

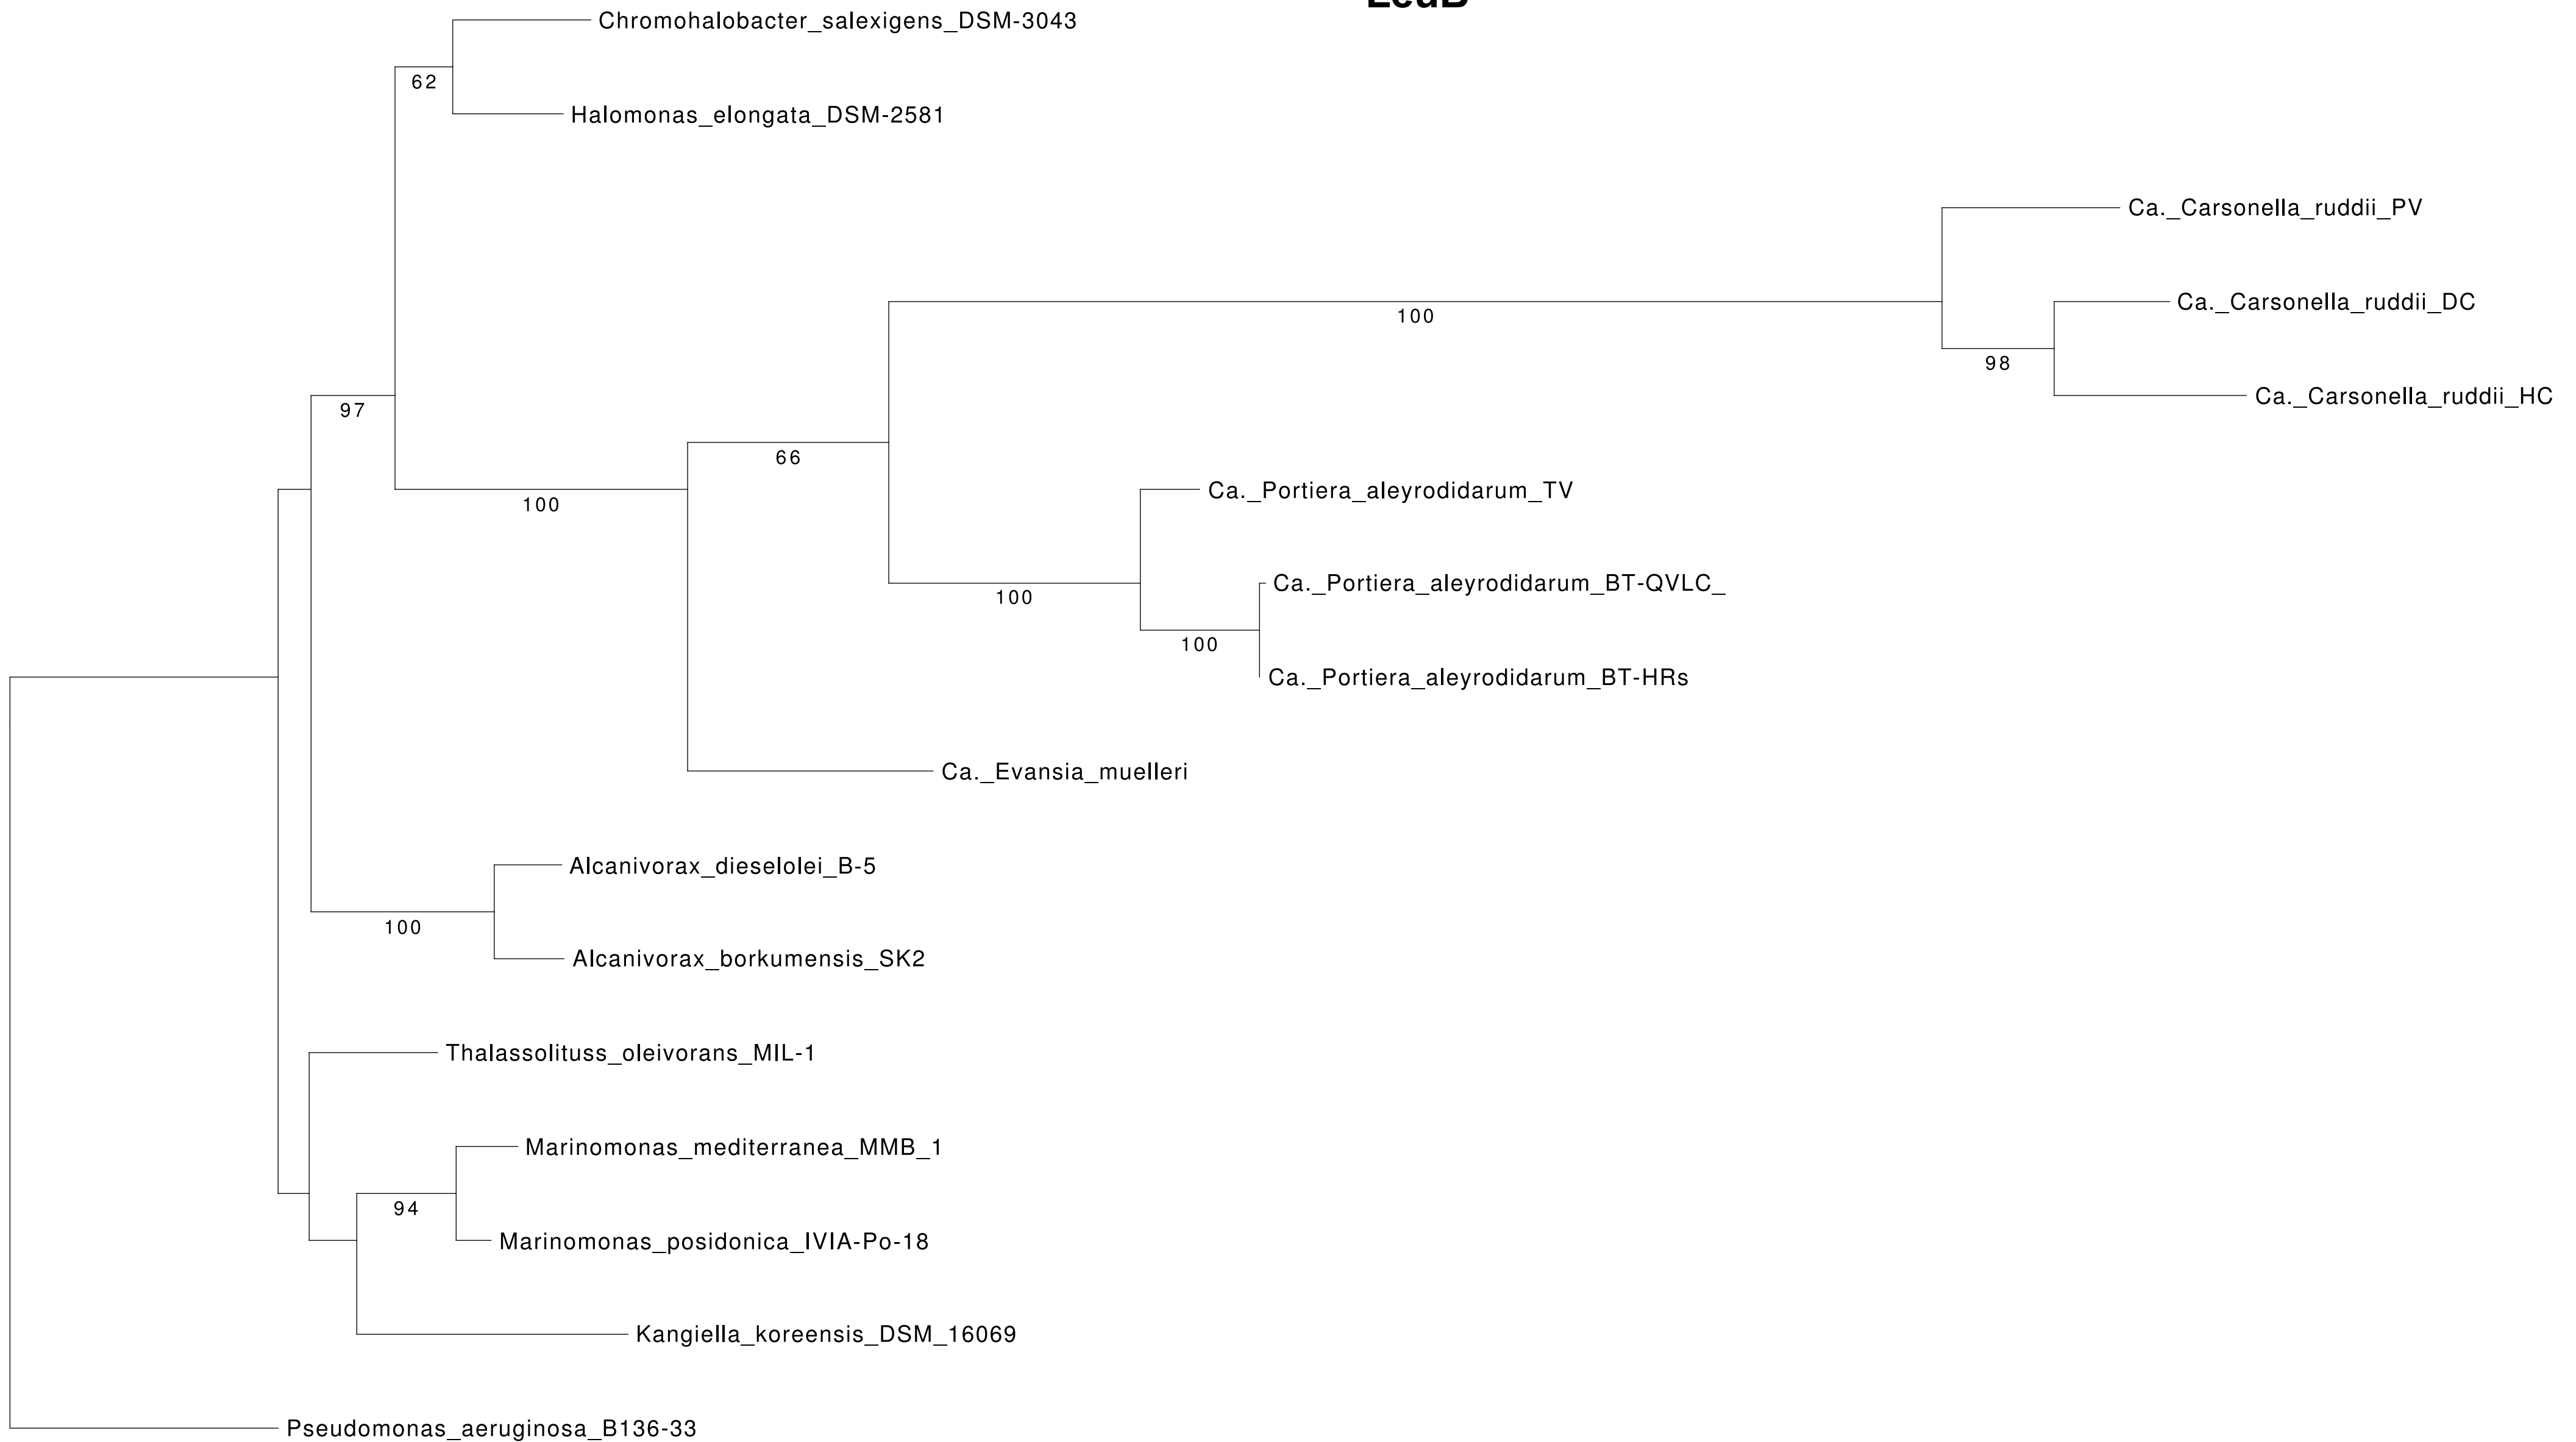

# LeuC

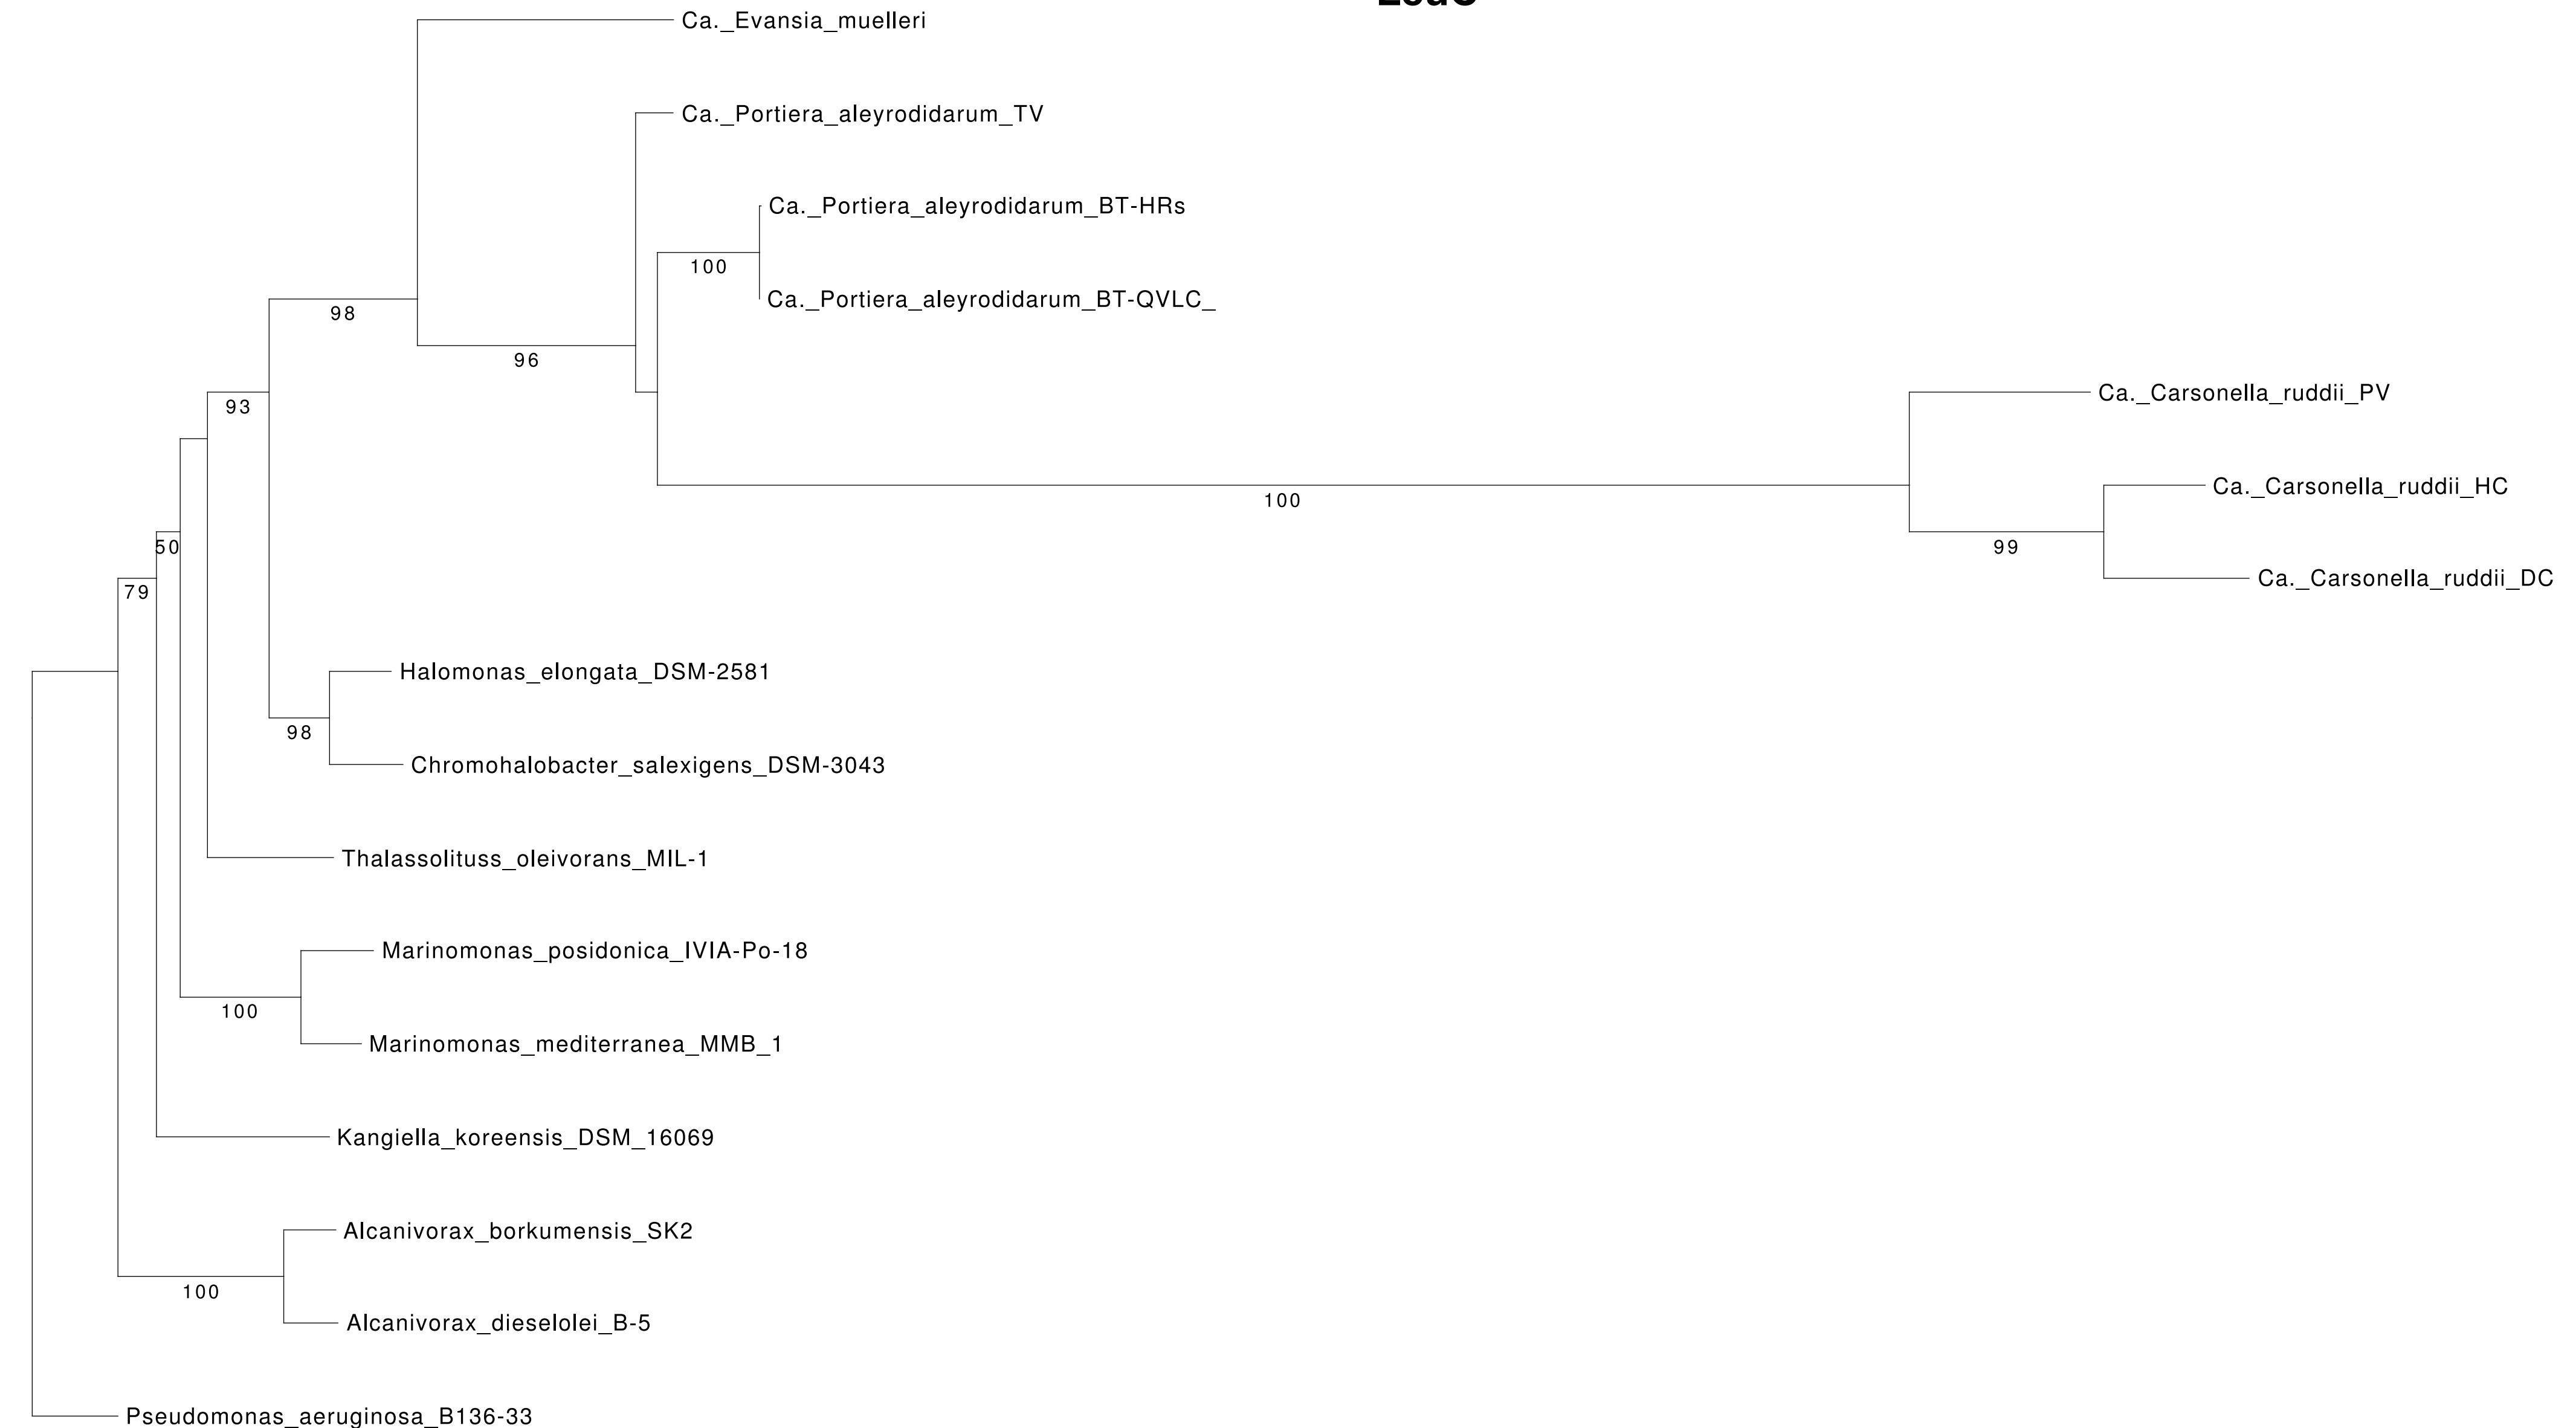

# LeuS

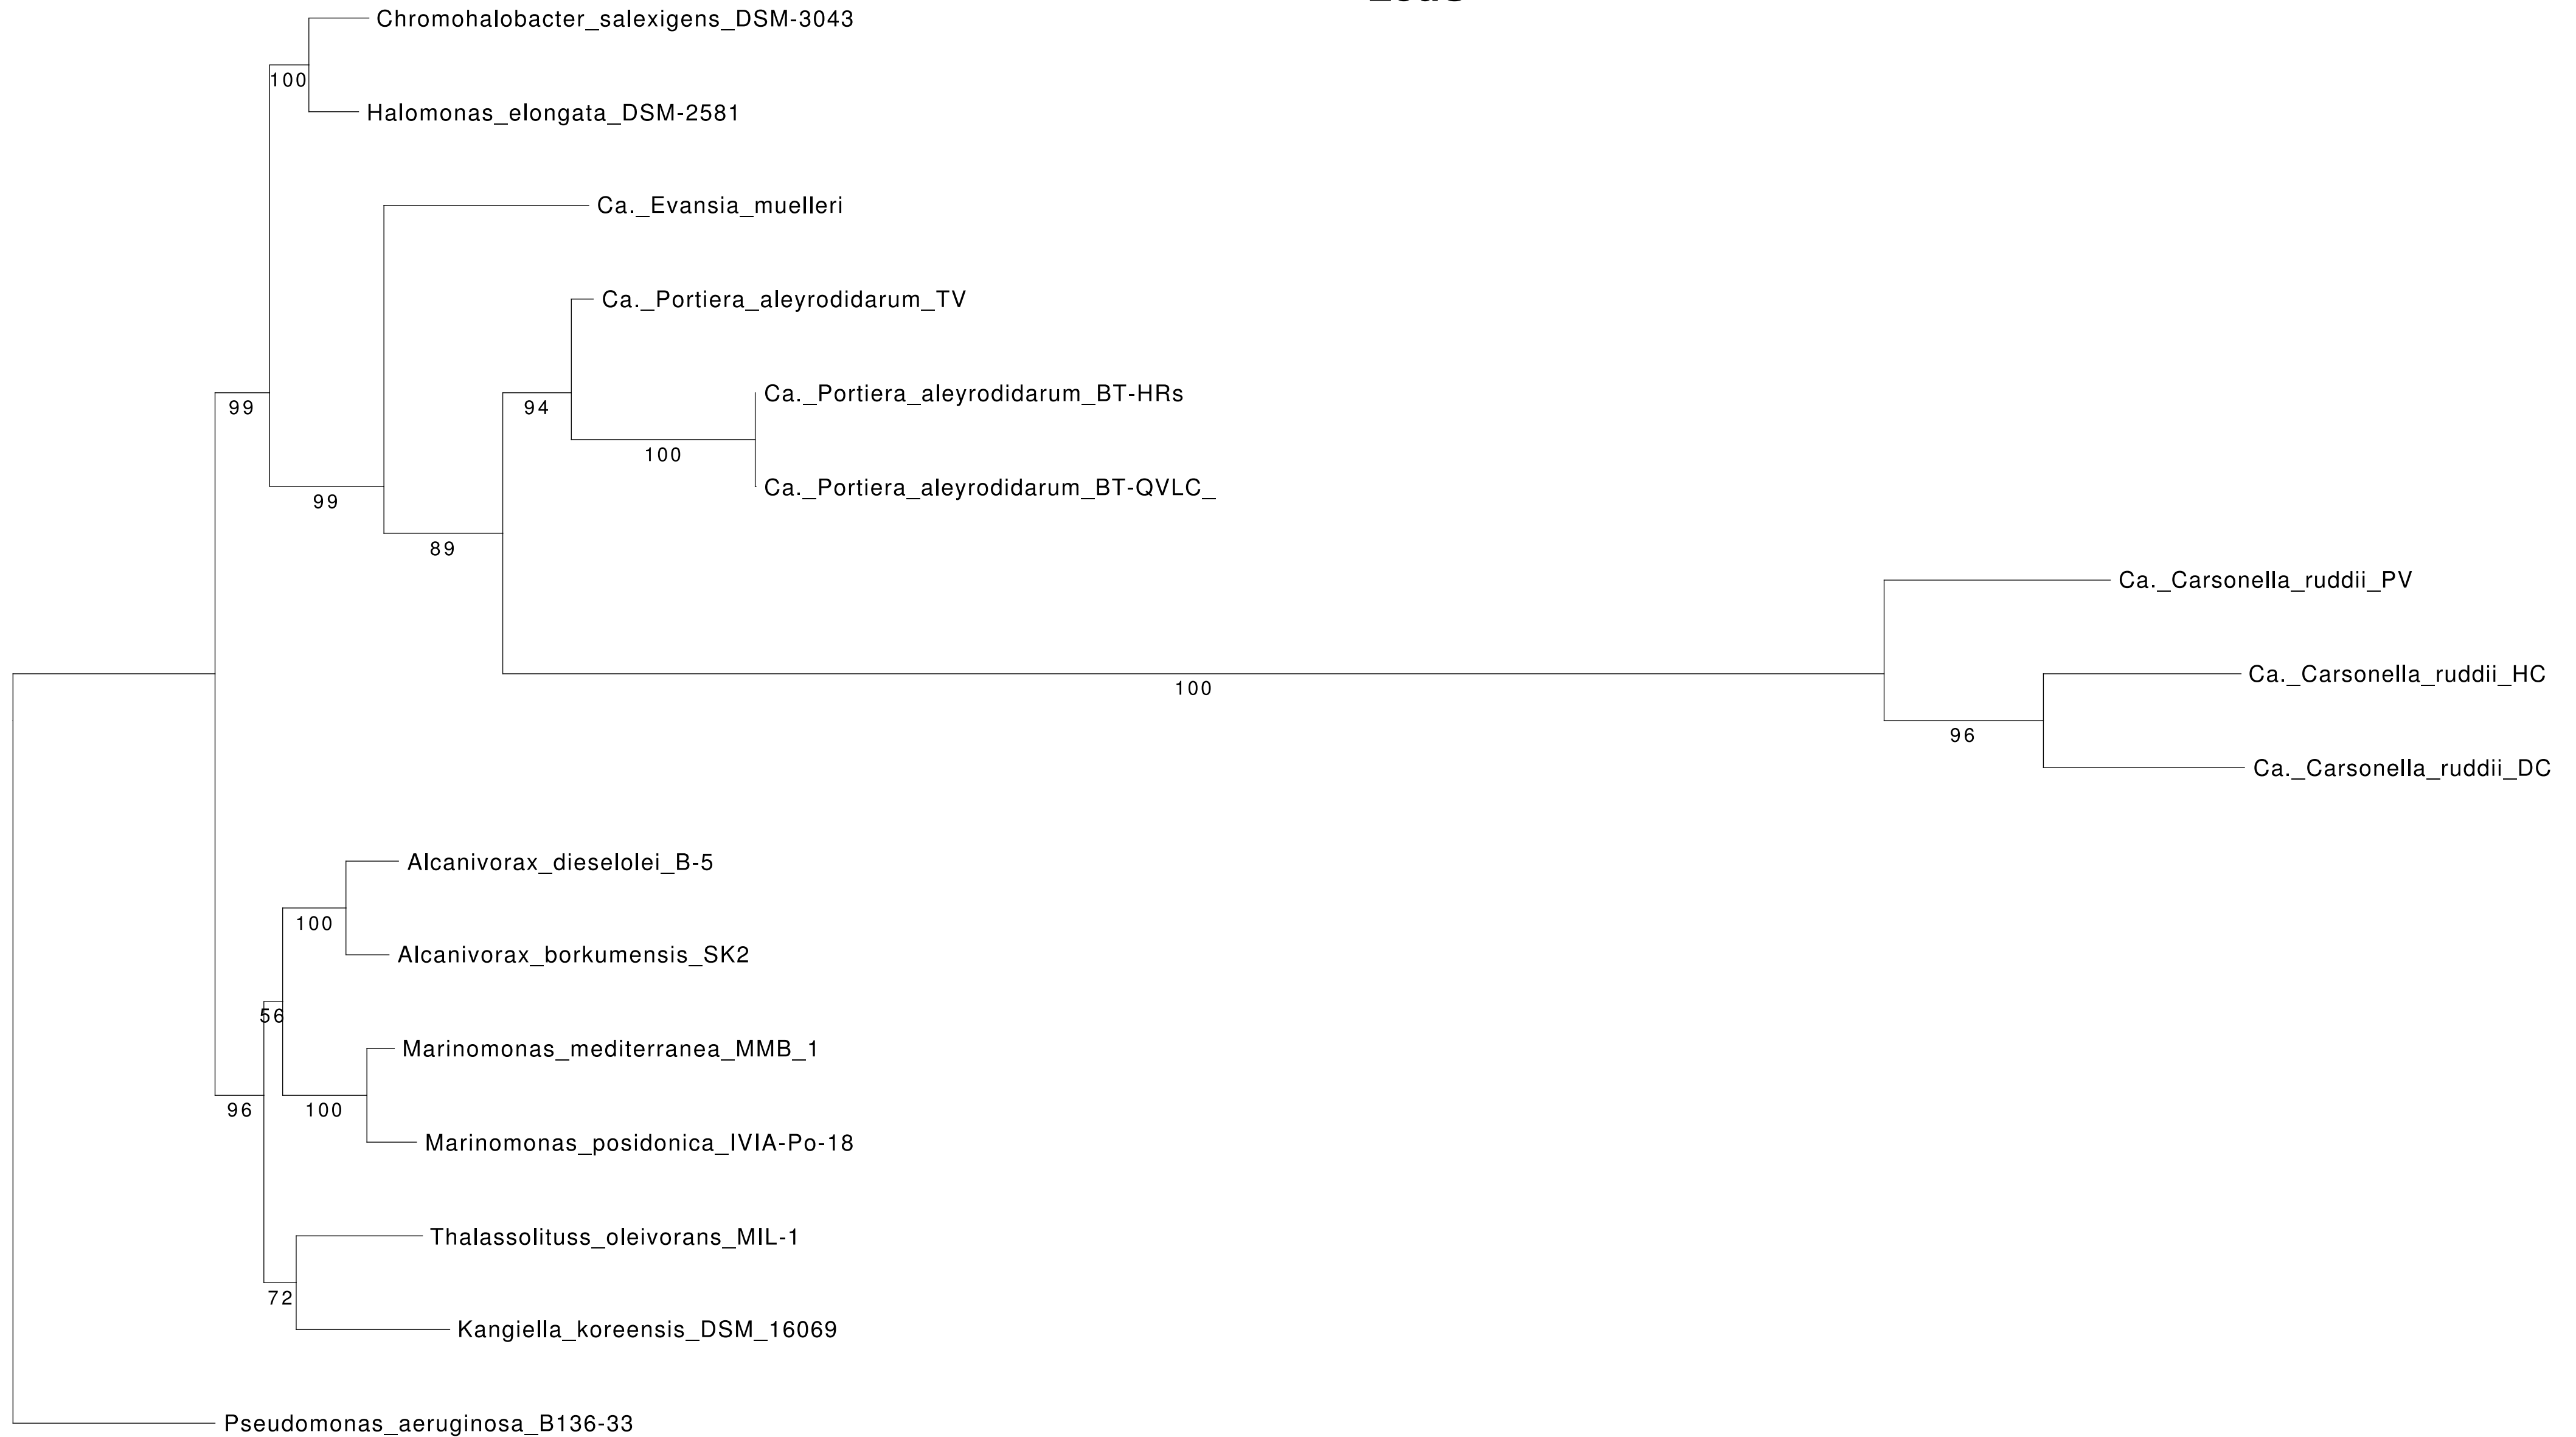

# LysC

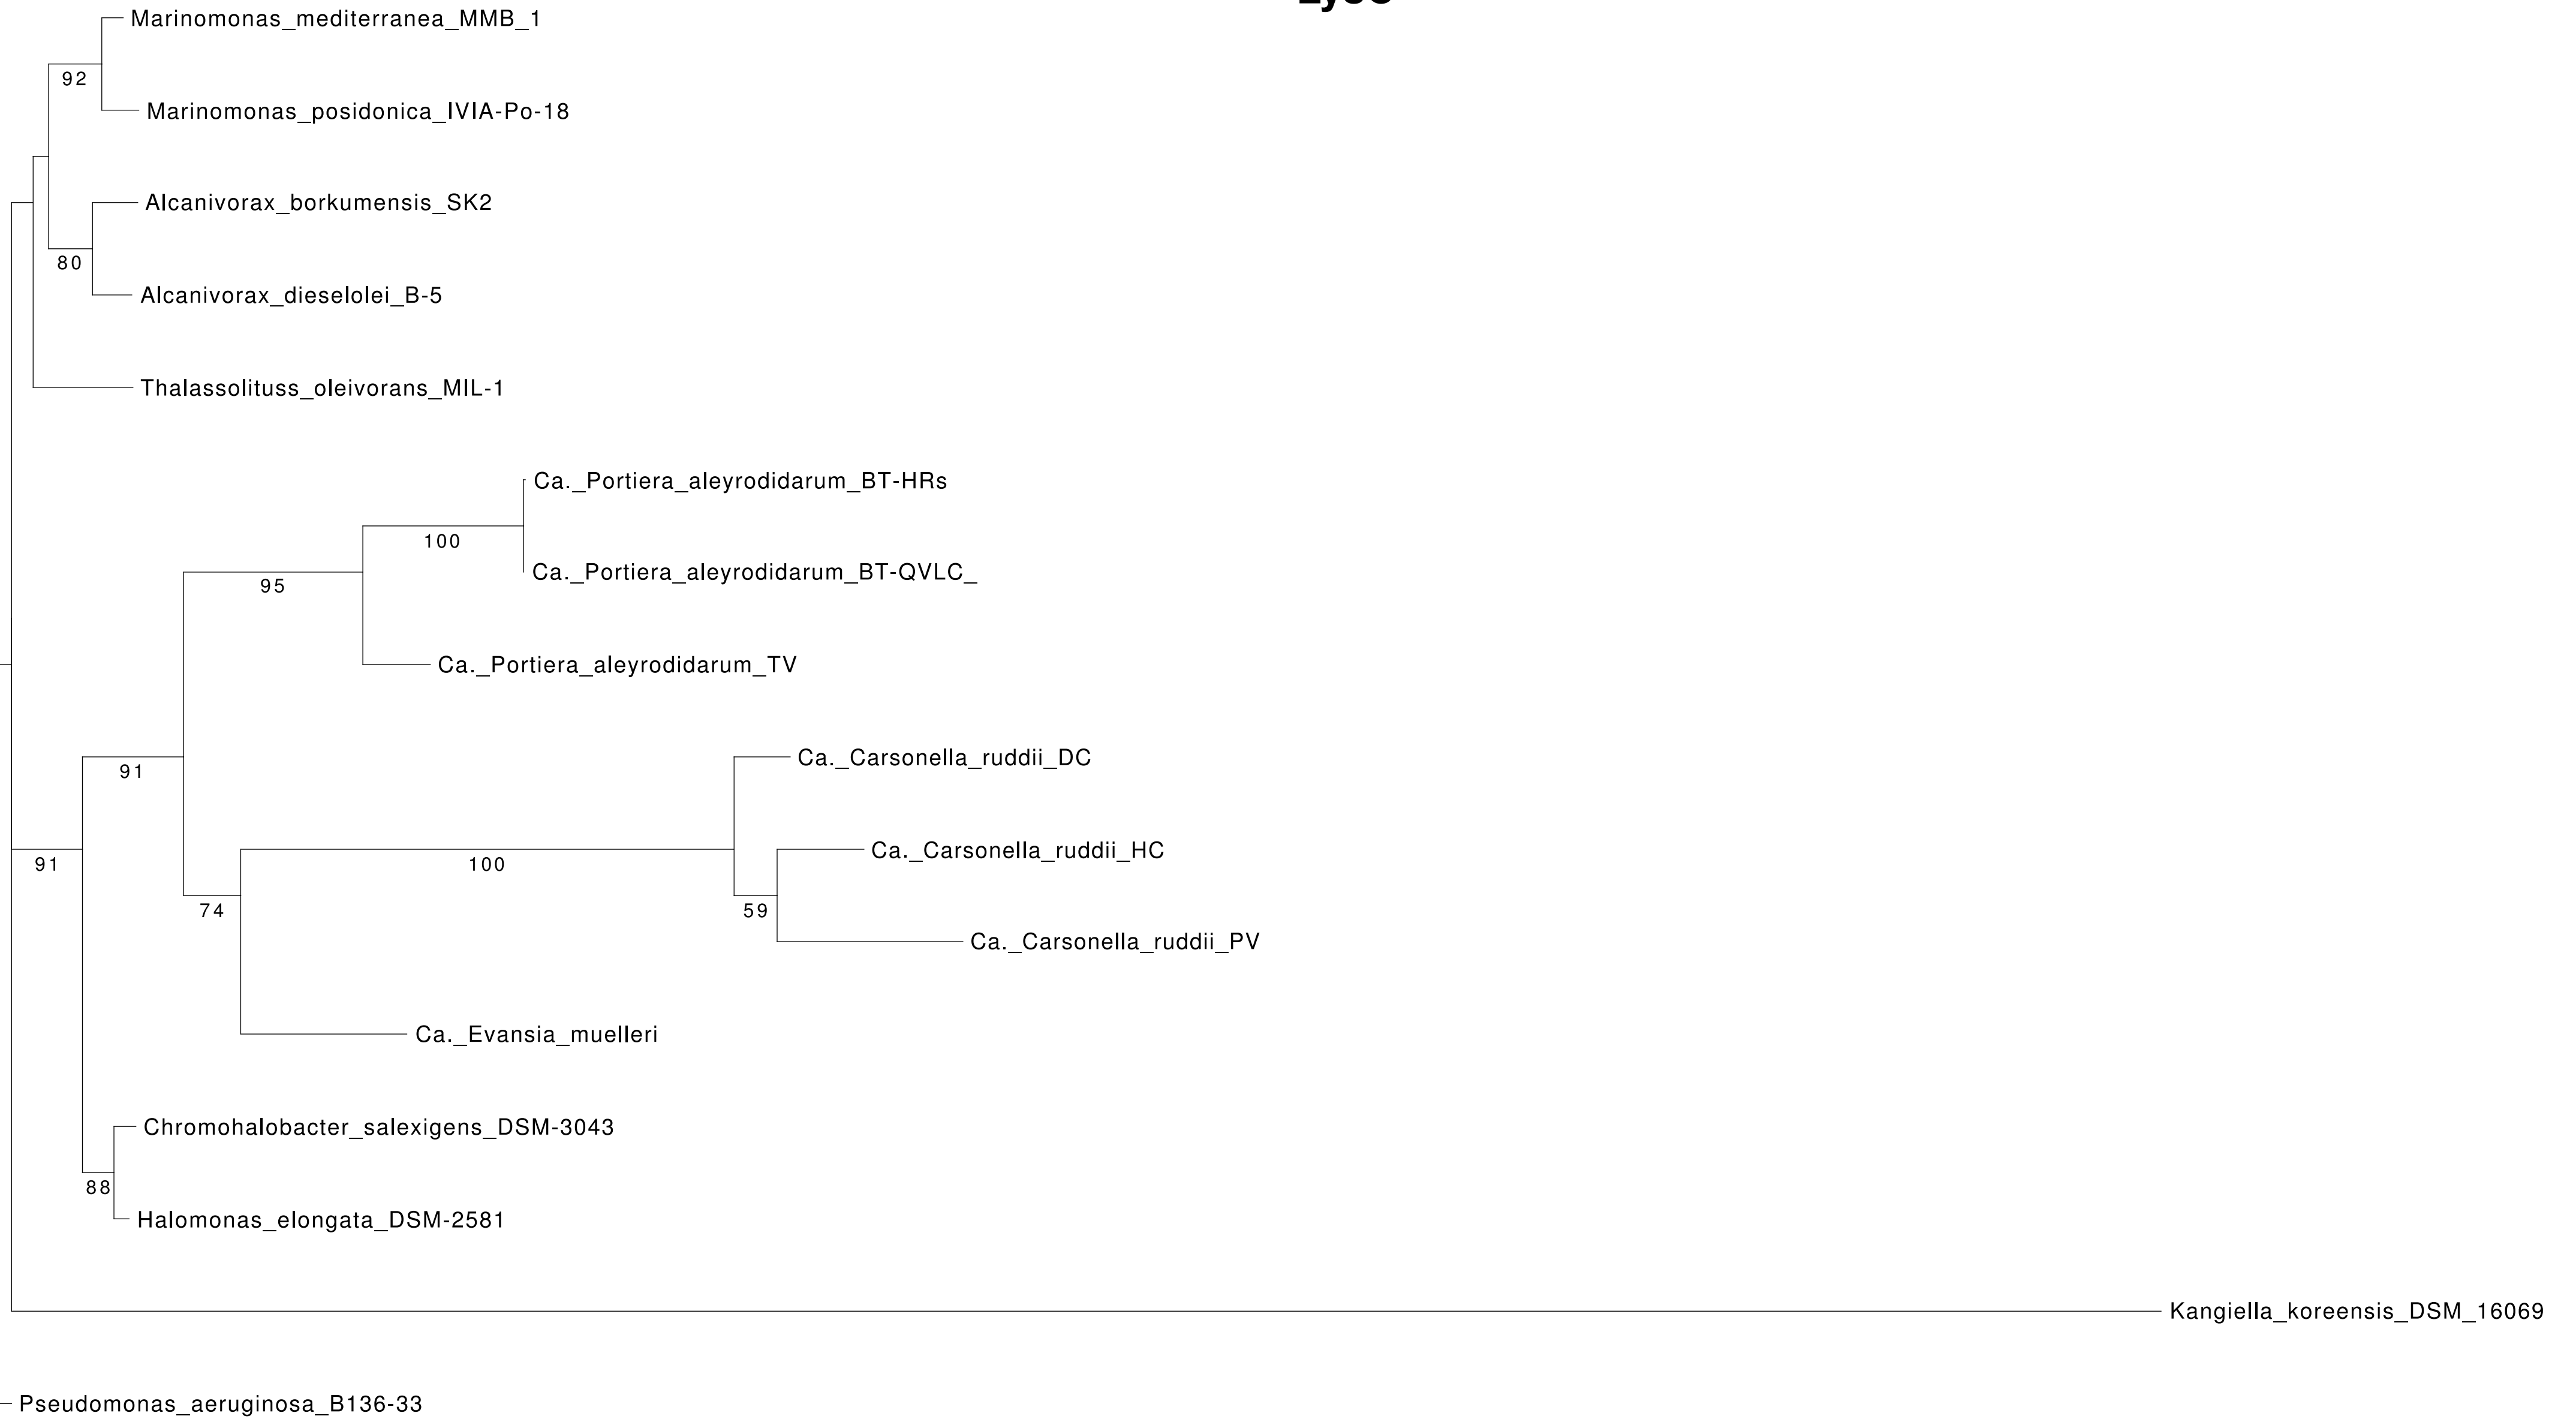

# MnmeE

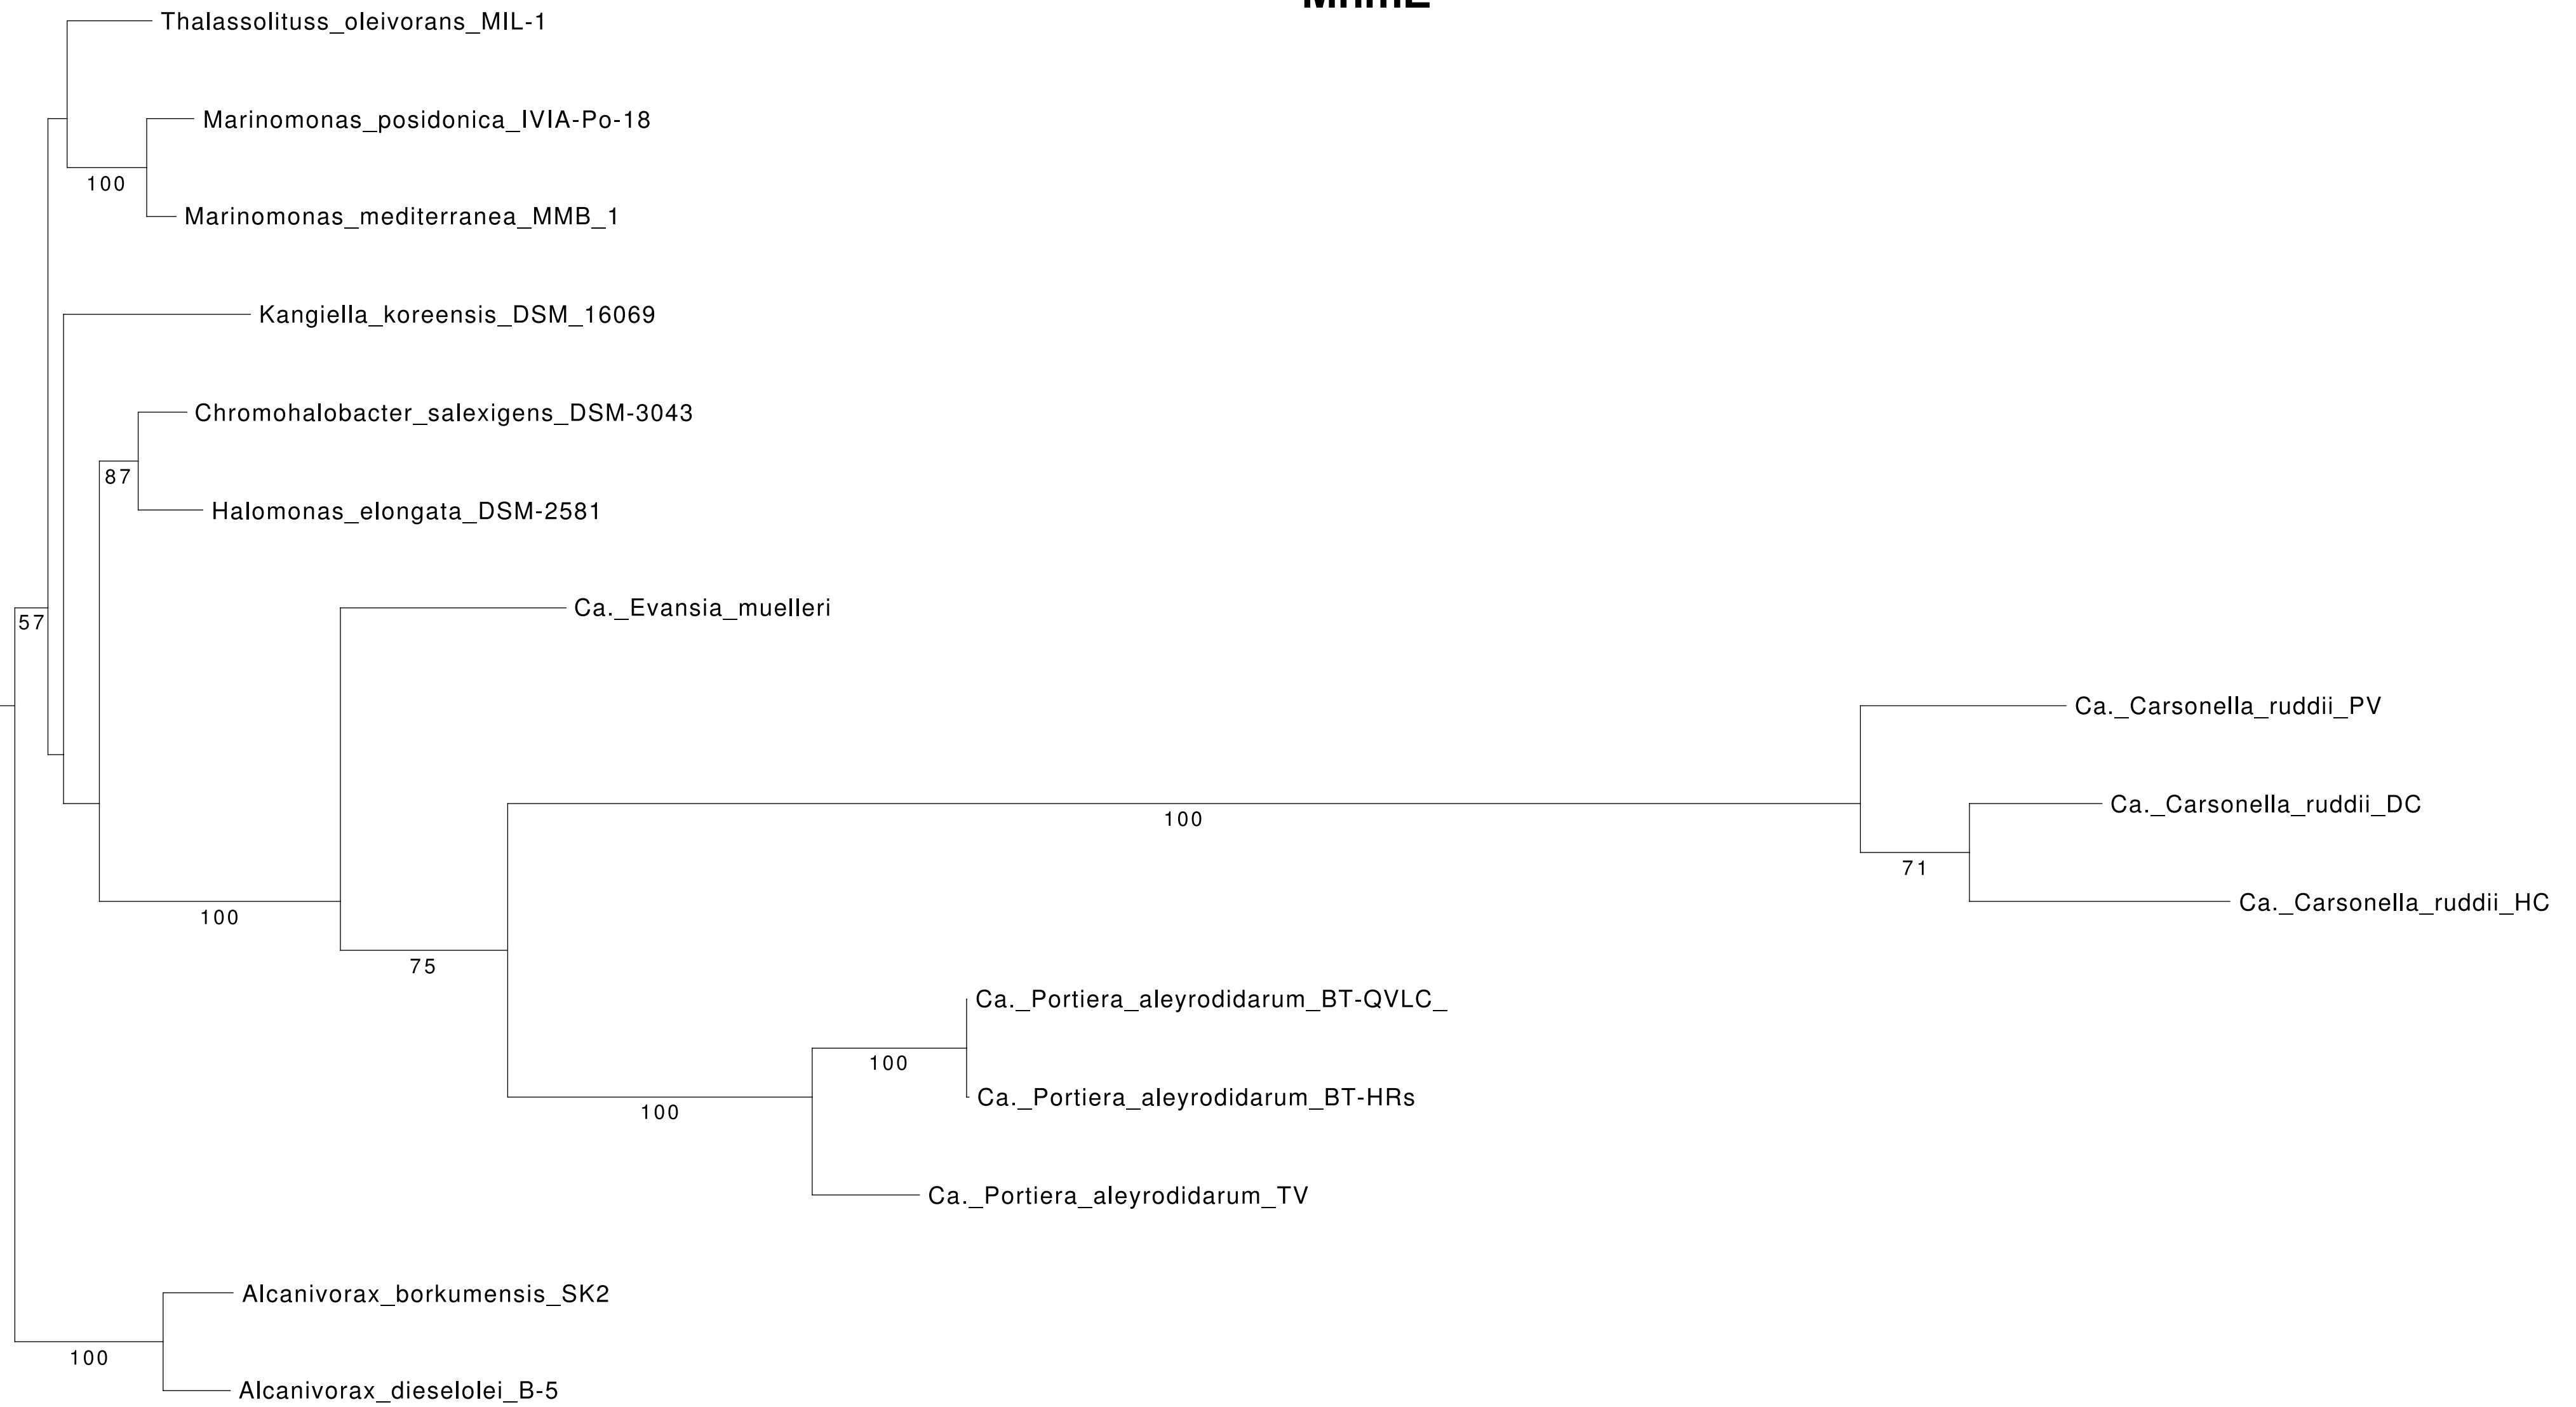

0.1



# MnmG

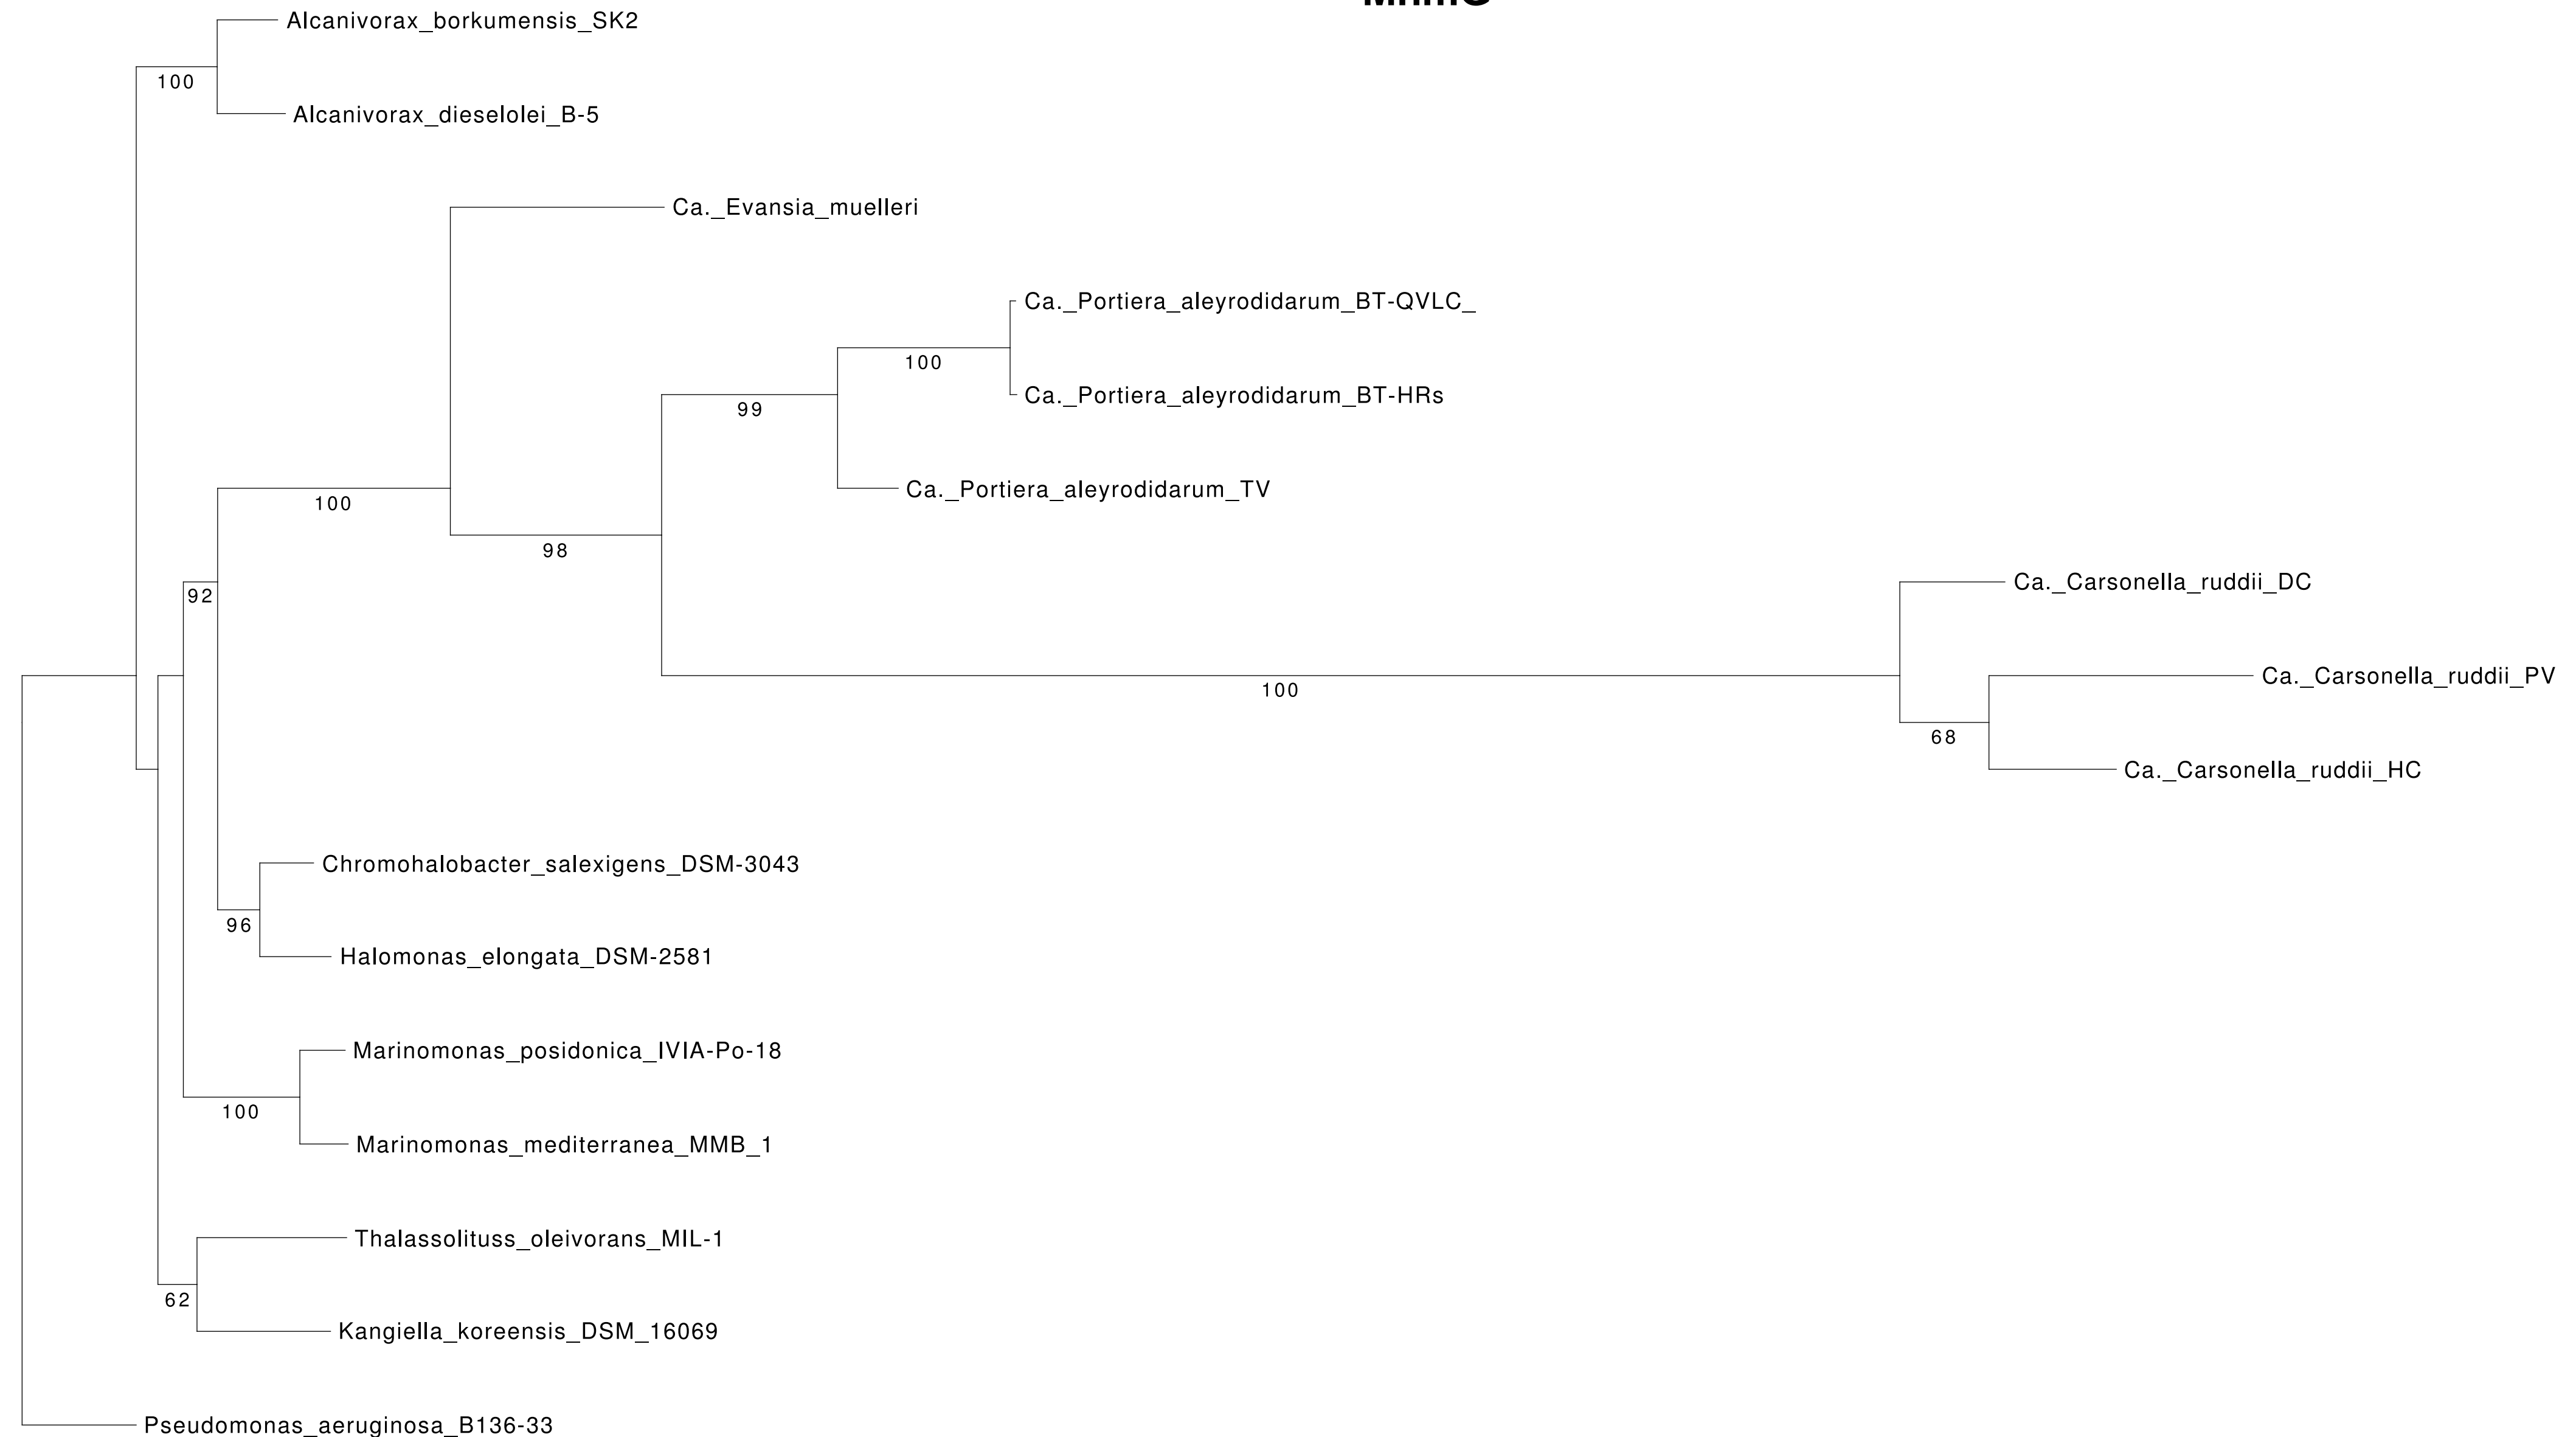

# PrfA

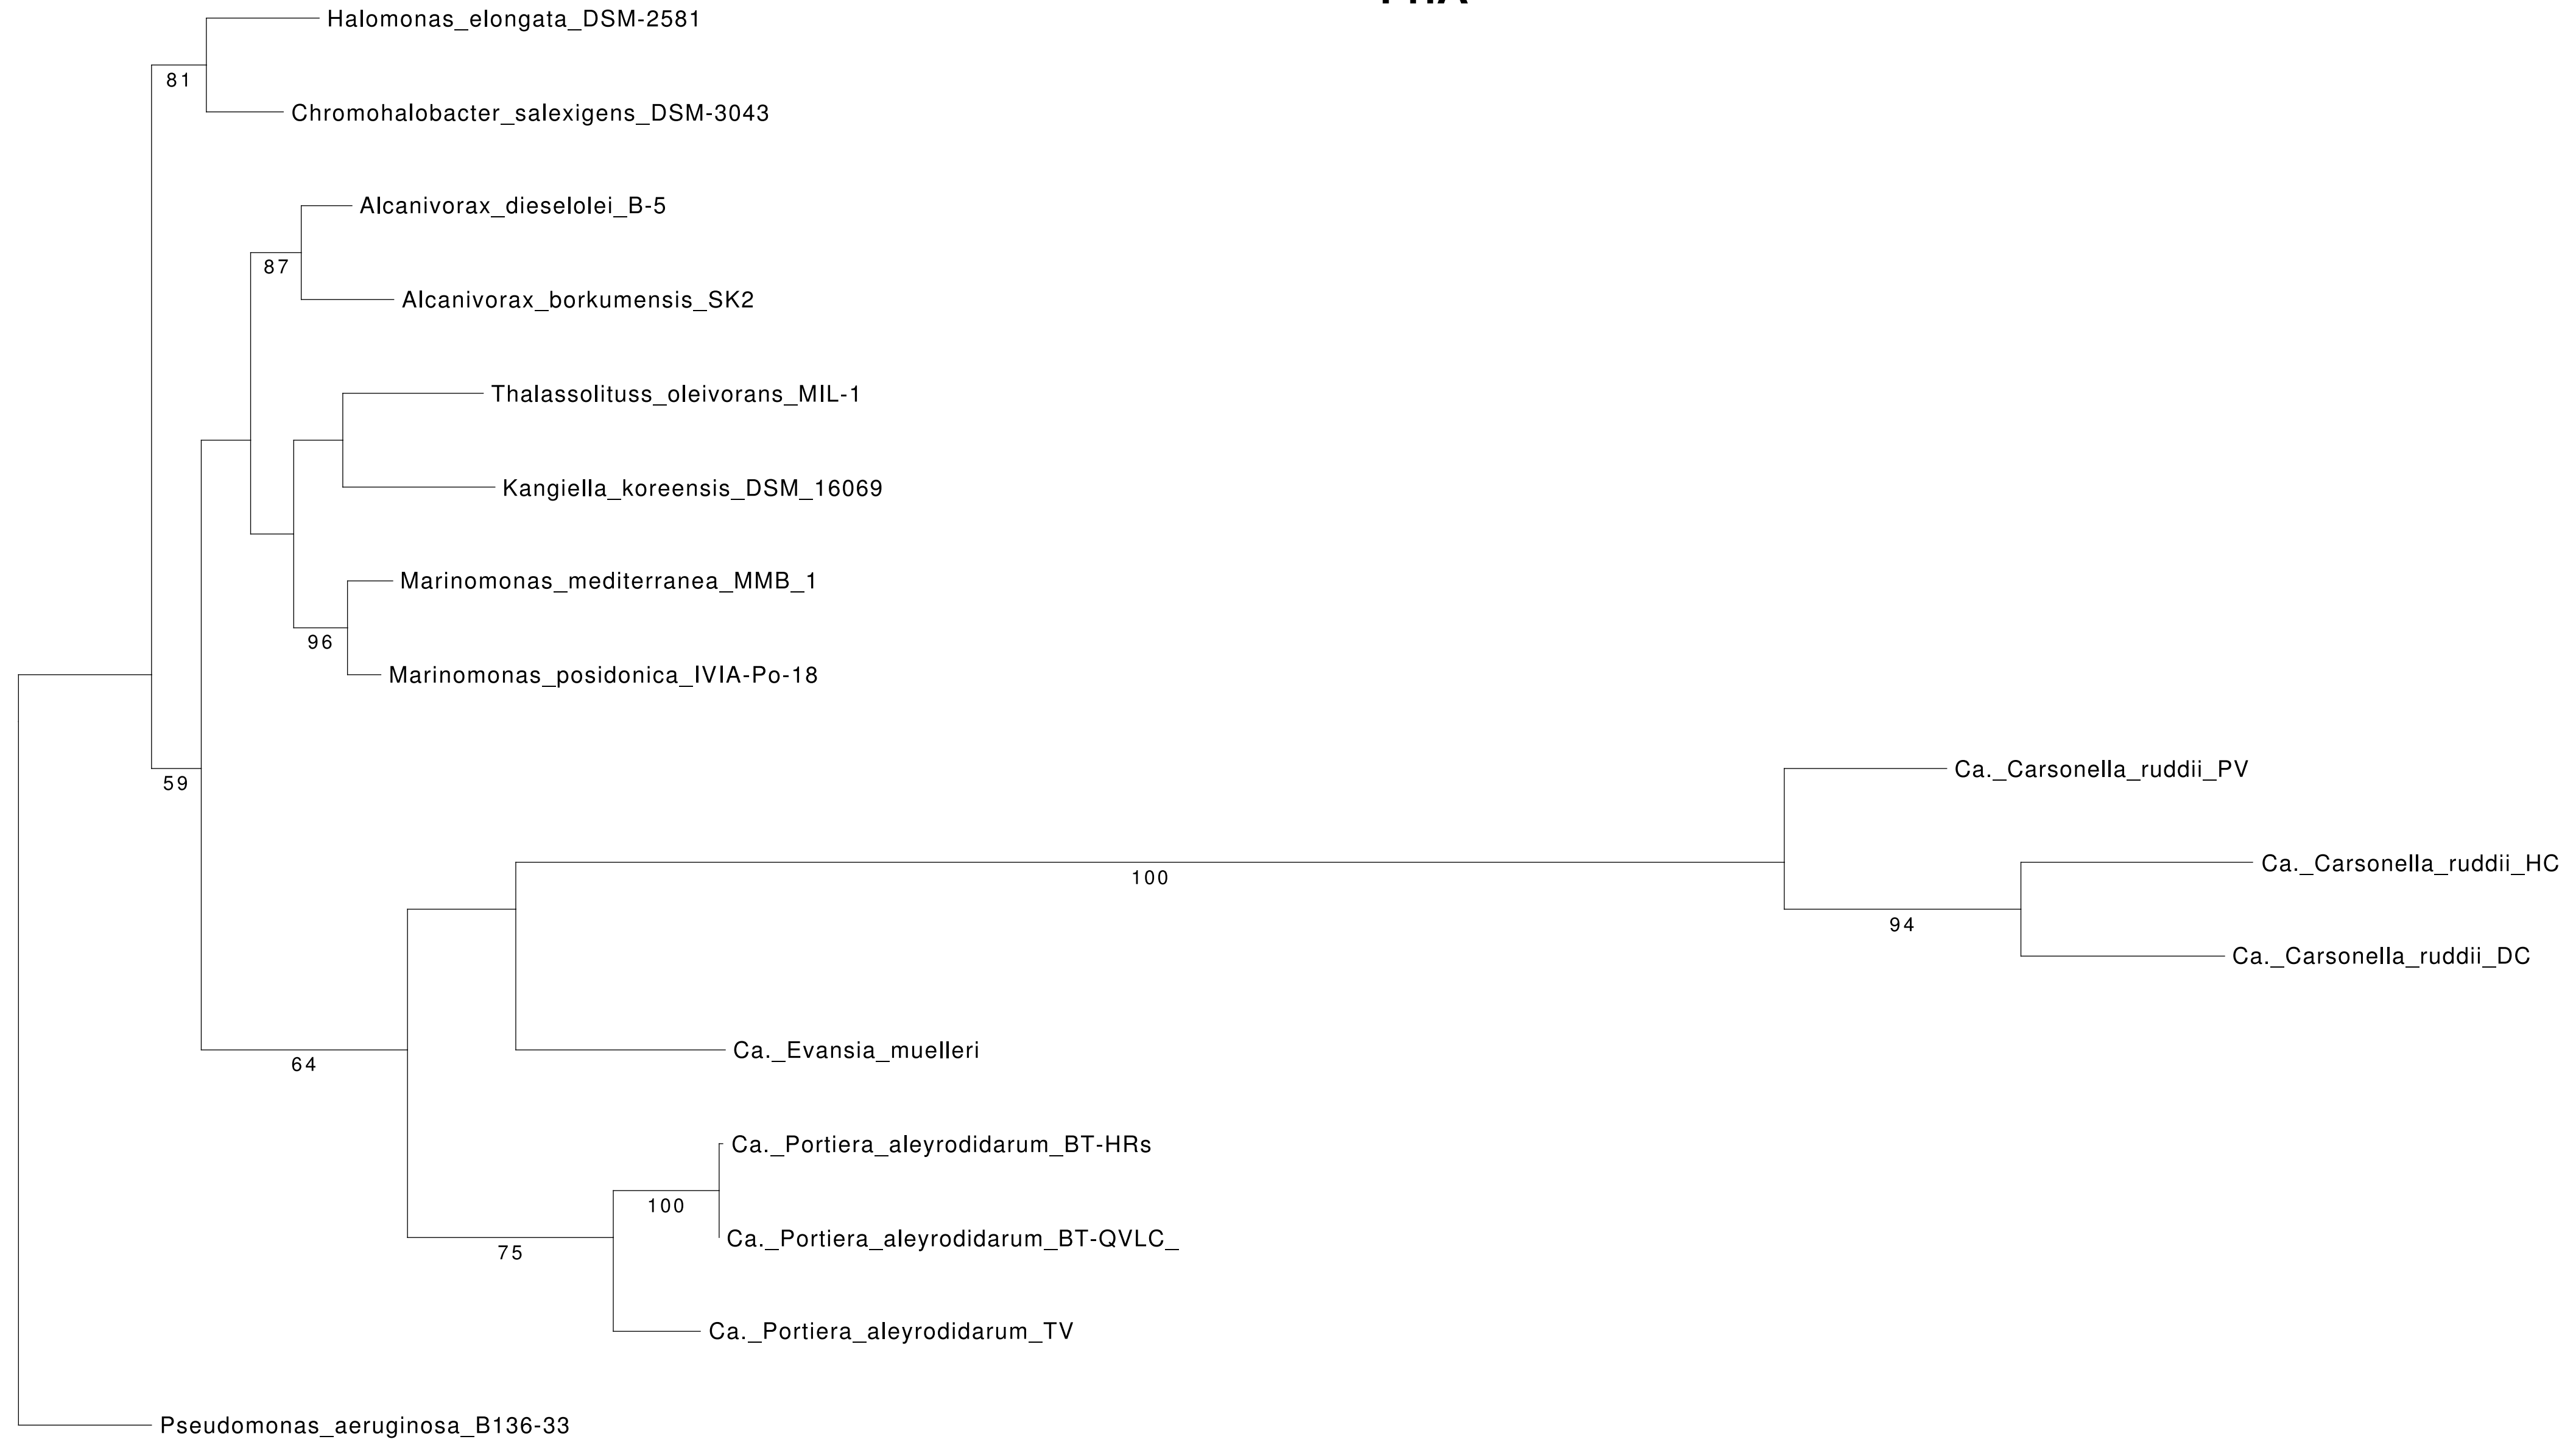

0.1

# RpIB

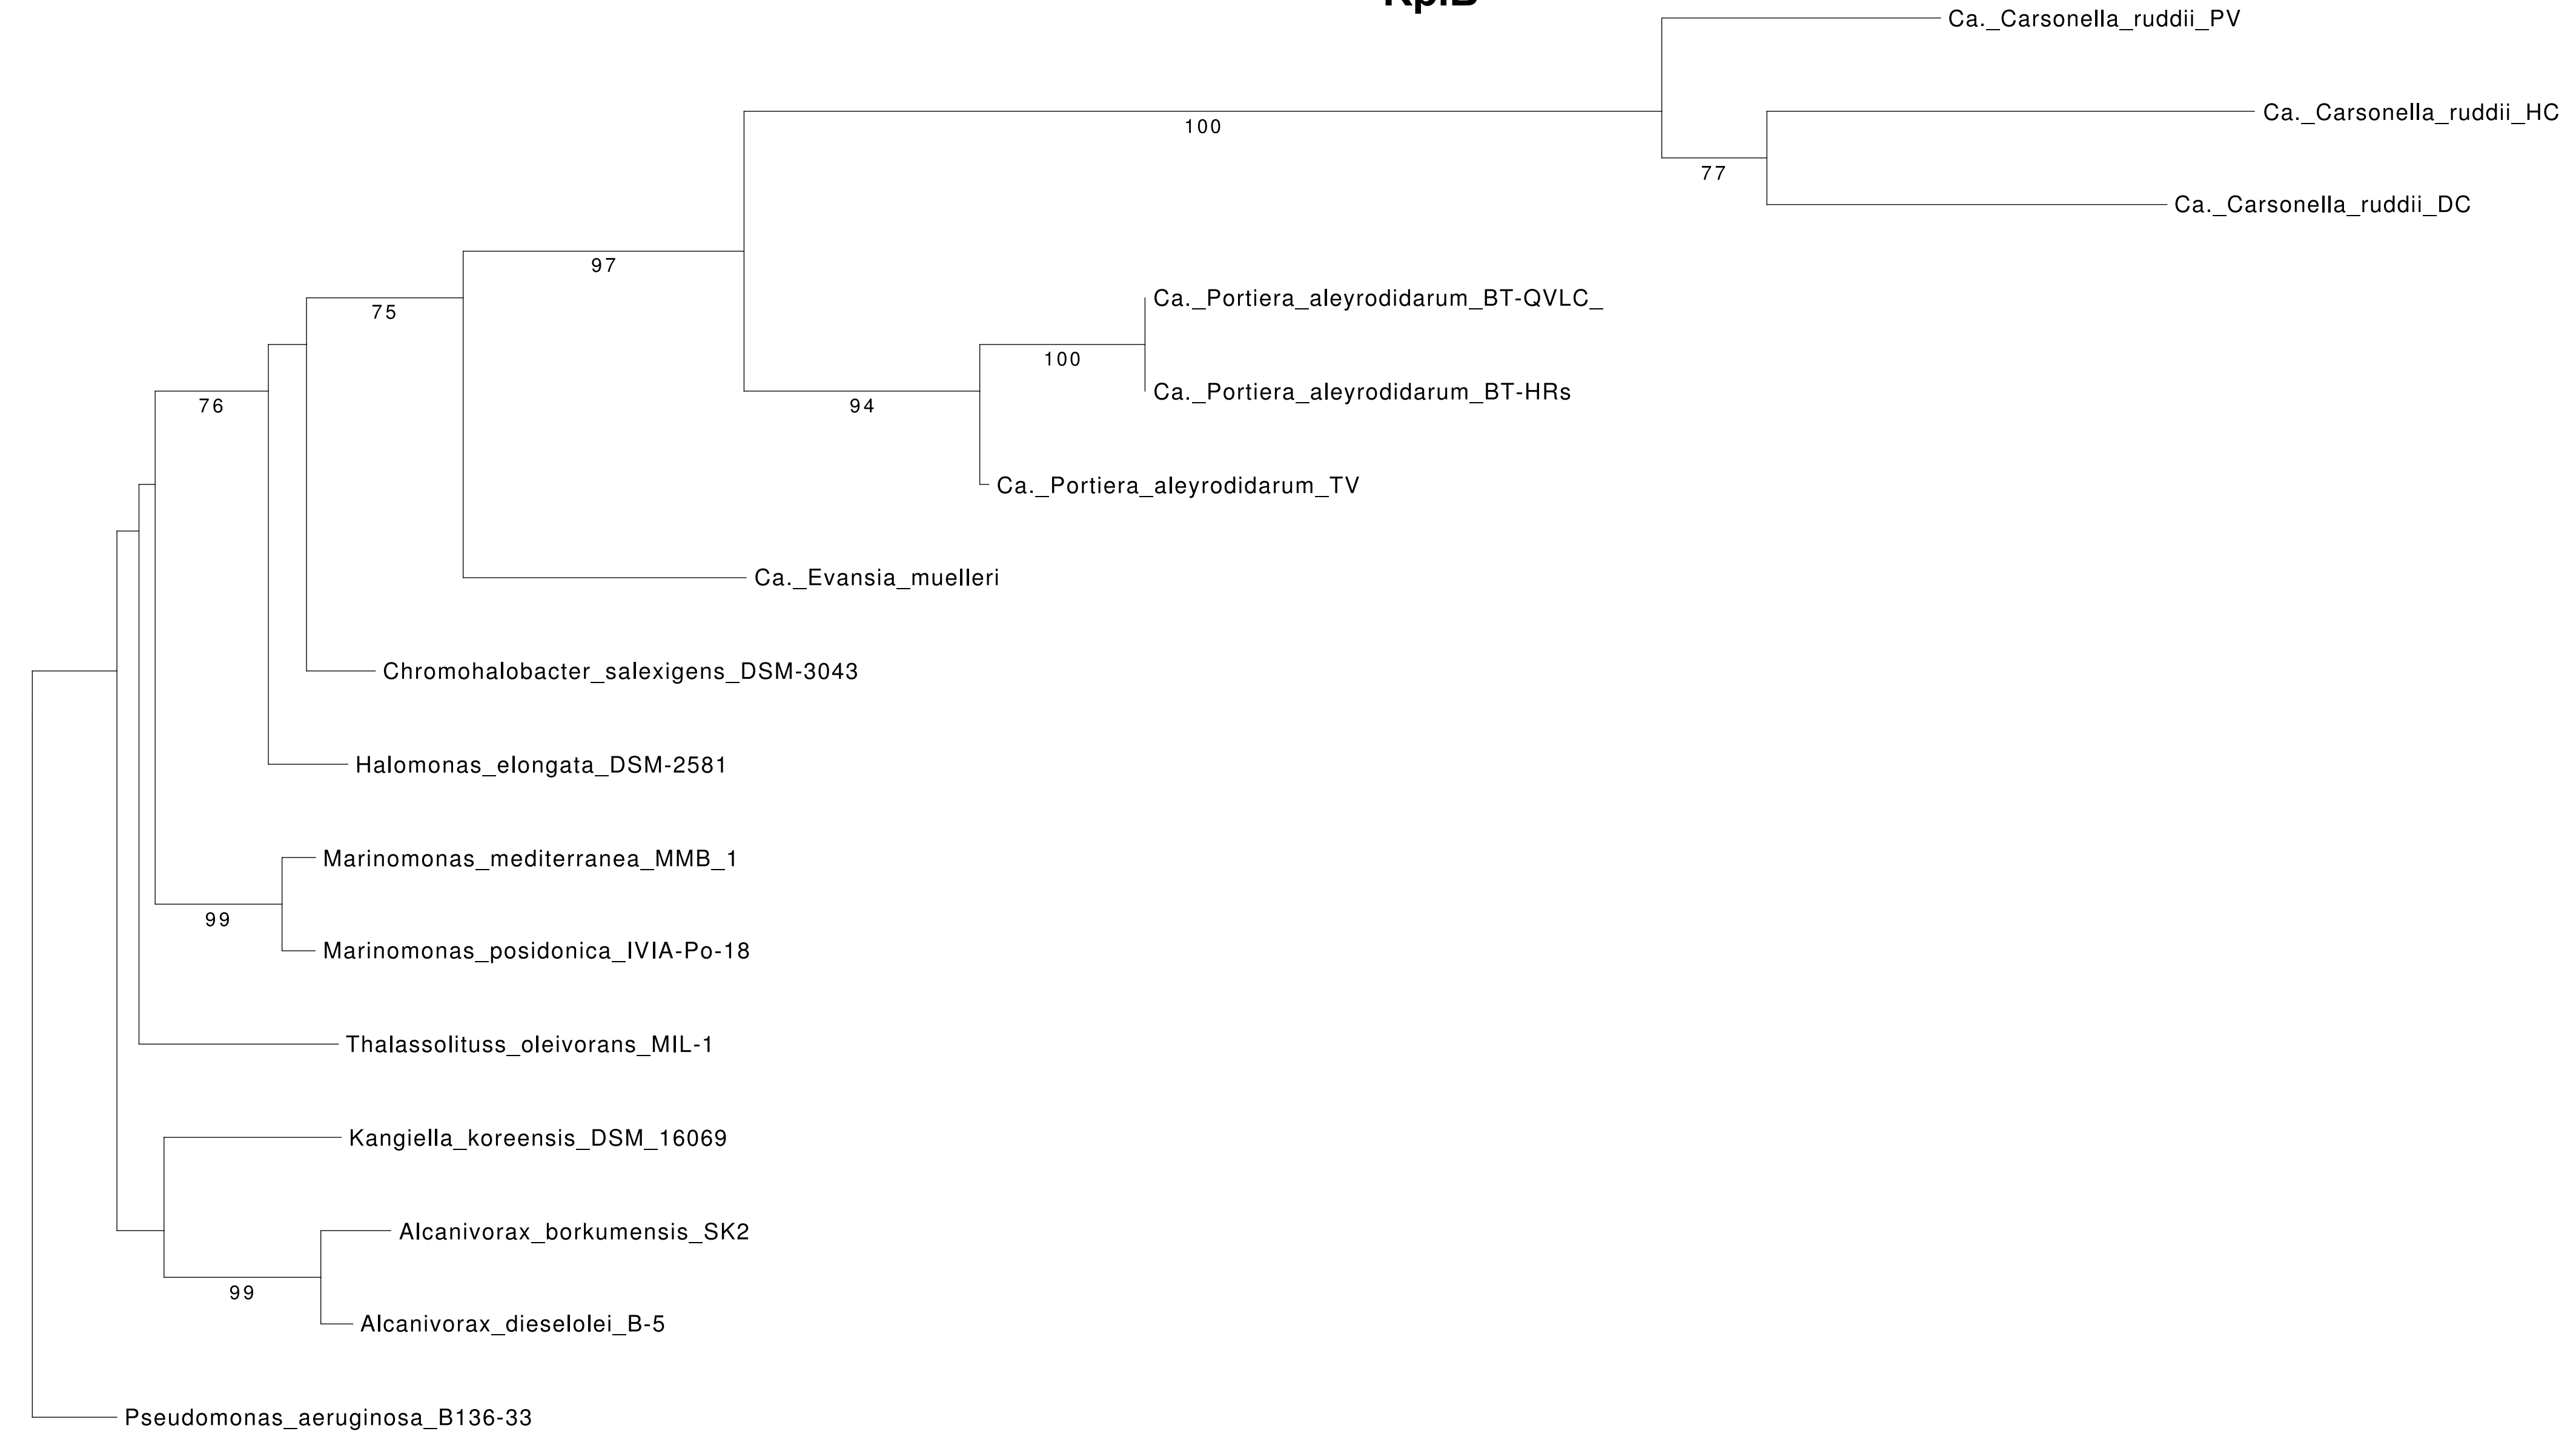

# RpoB

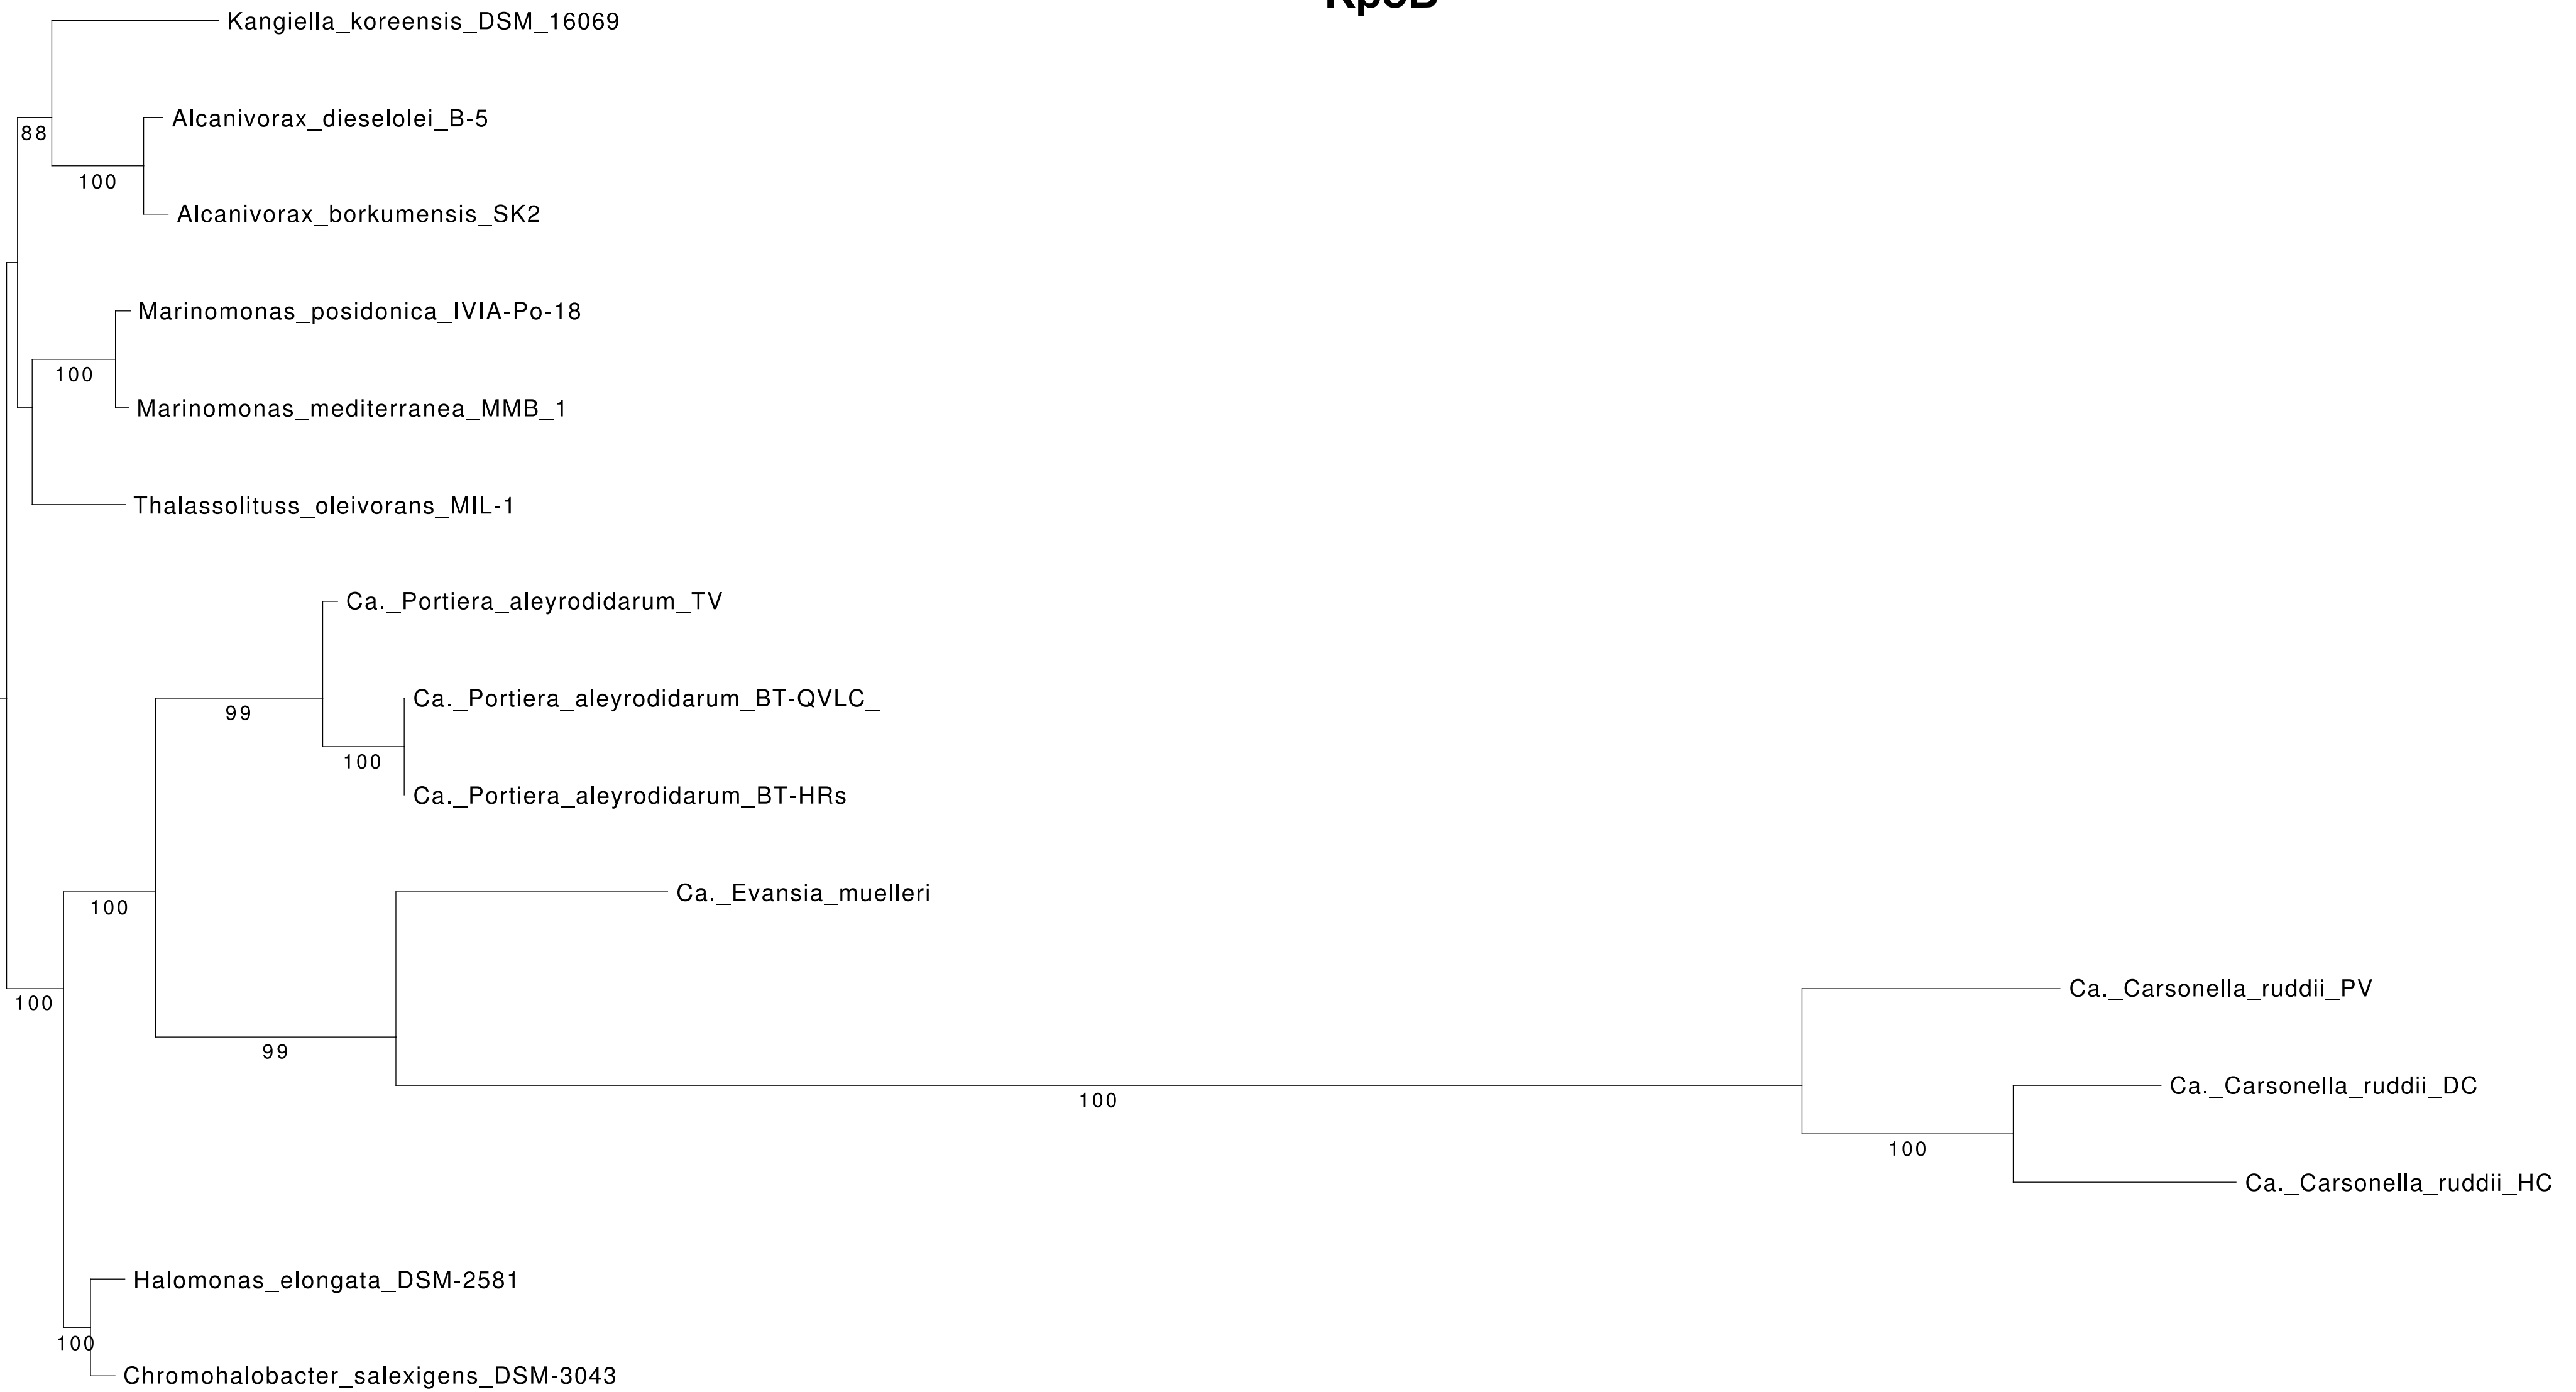

*Pseudomonas aeruginosa* B136-33

0.1

# RpoC

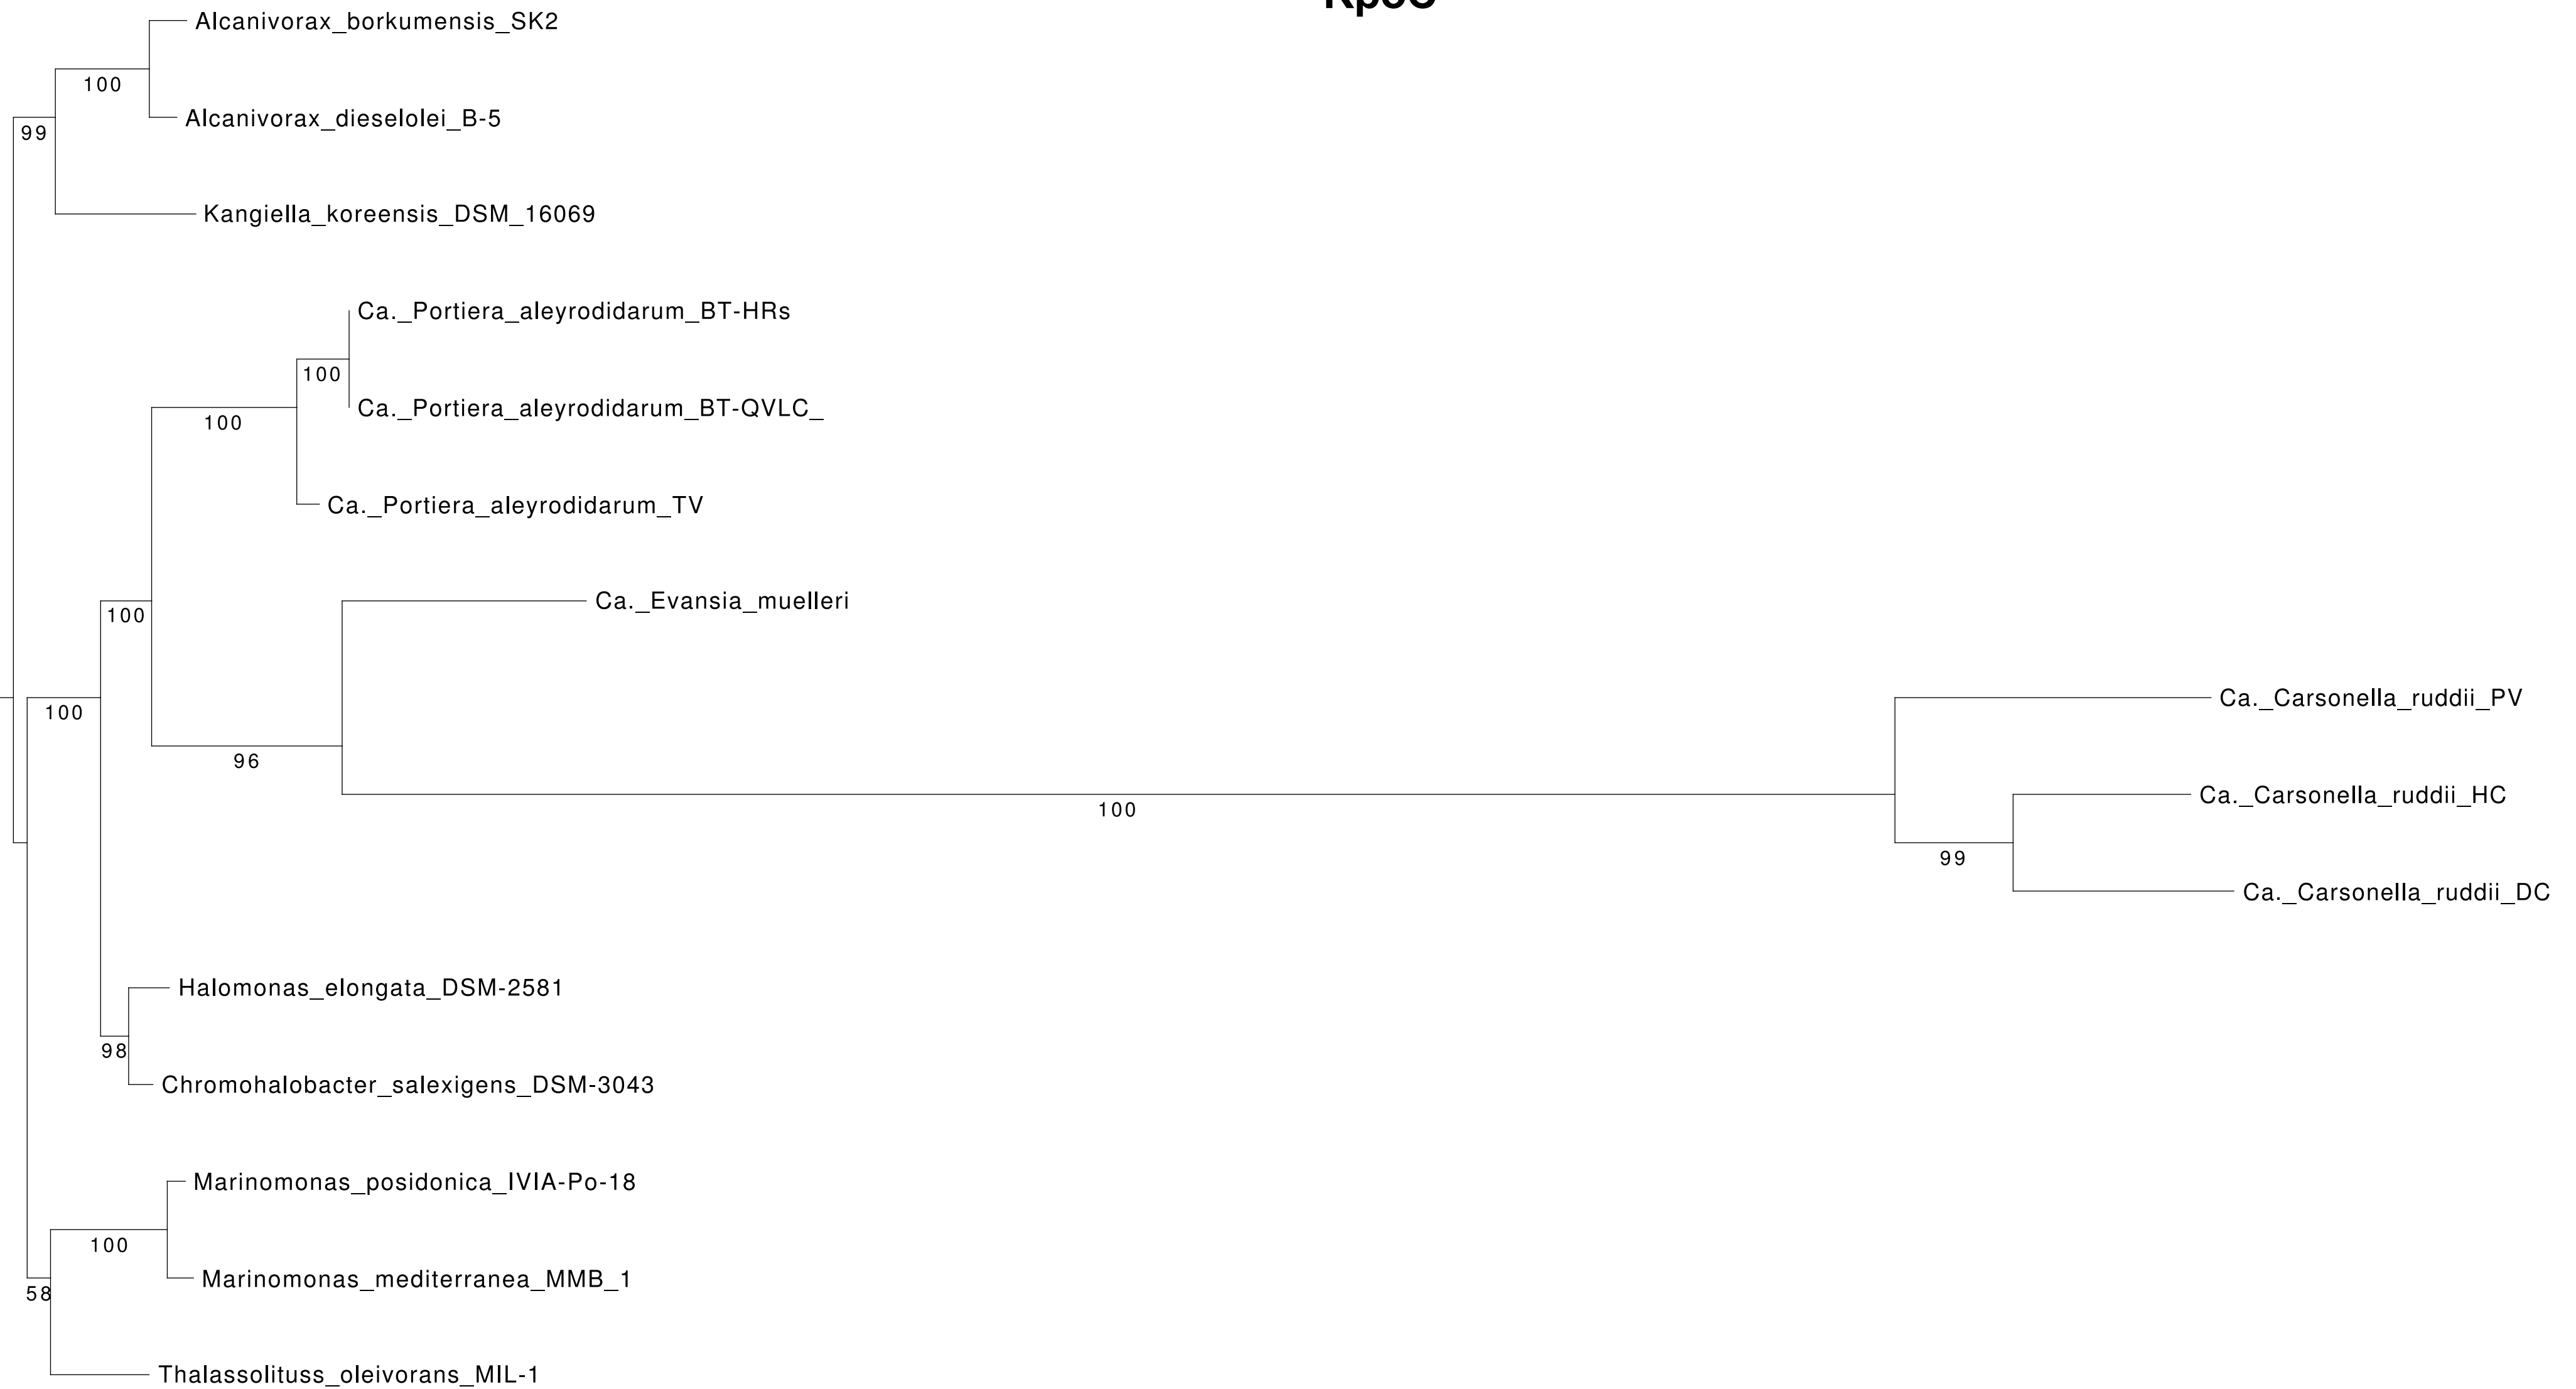

0.1

# Tu

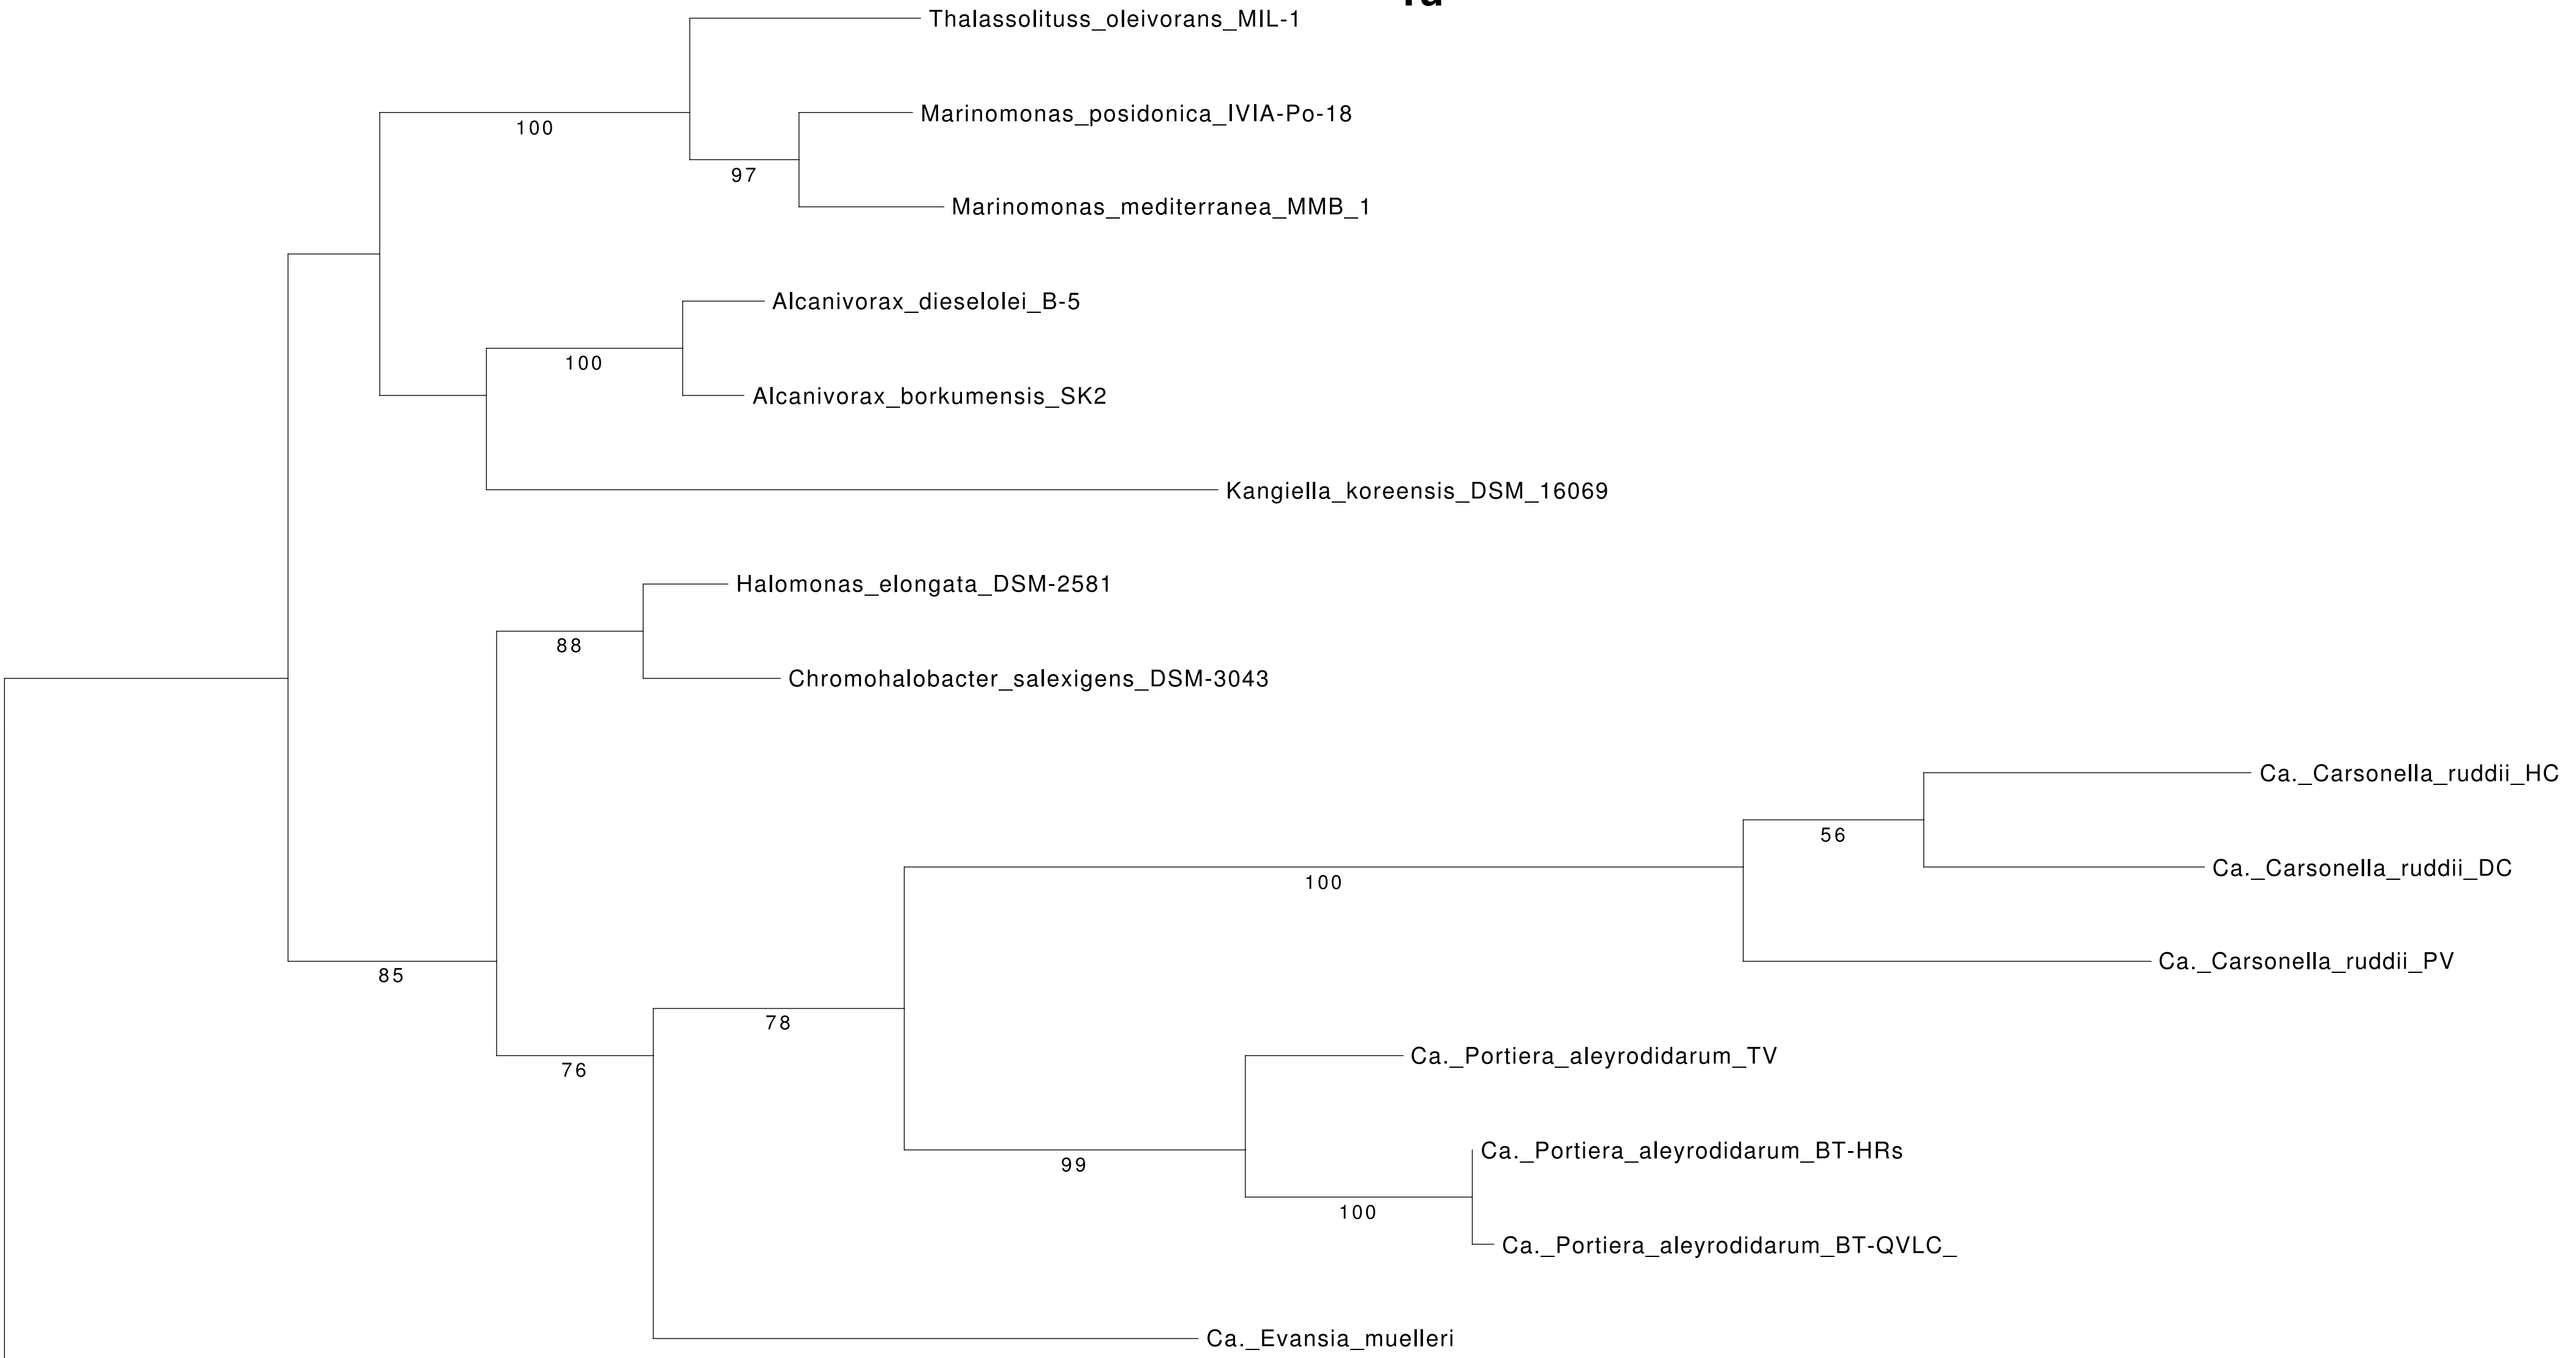

0.1

# Vals

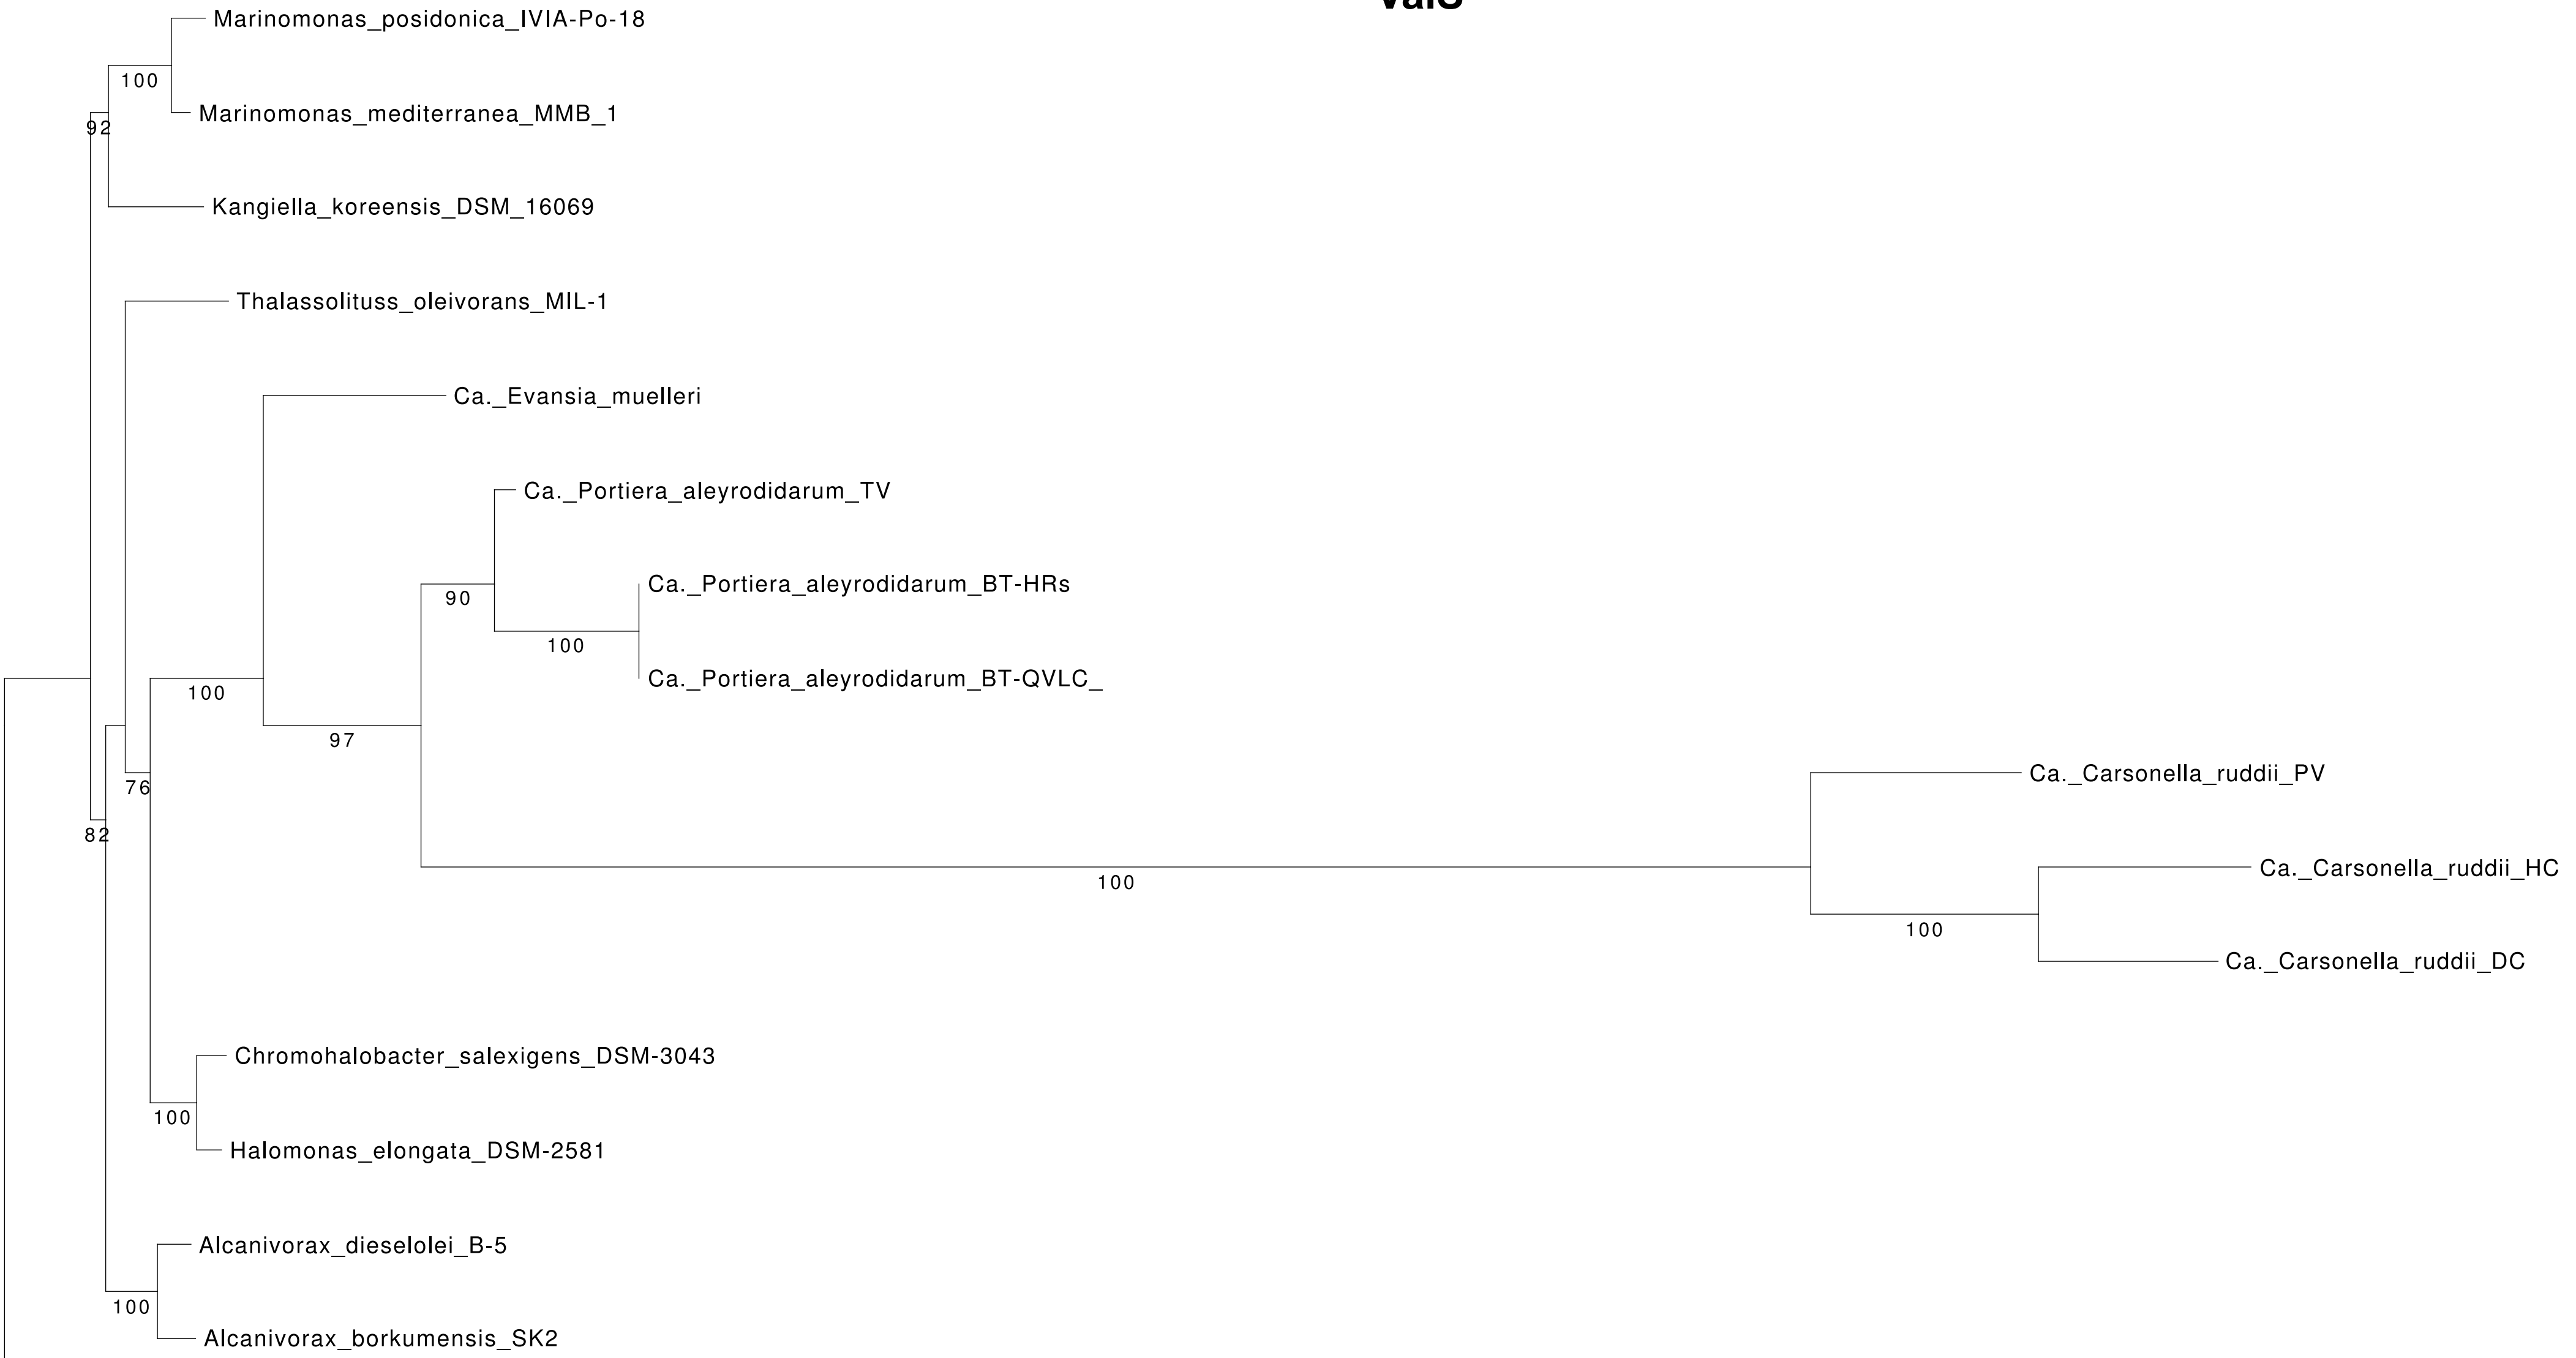

1.0
